# Supplementary material for: Catalytic reductive deoxygenation of esters to ethers driven by hydrosilane activation through non-covalent interactions with a fluorinated borate salt
Source: Royal Society of Chemistry journal article supplement (doi:10.1039/d0cy00775g), 2020-01-01
Supplement: d0cy00775g1.pdf [file d0cy00775g1.pdf]

## Supporting Information

# Catalytic reductive deoxygenation of esters to ethers driven by a hydrosilane activation through non-covalent interactions with a fluorinated borate salt

Vincent Rysak,<sup>a</sup> Ruchi Dixit,<sup>b</sup> Xavier Trivelli,<sup>c</sup> Nicolas Merle,<sup>a</sup> Francine Agbossou-Niedercorn,<sup>a</sup> Kumar Vanka<sup>\*b</sup> and Christophe Michon<sup>\*a,d</sup>

*a. Univ. Lille, CNRS, Centrale Lille, Univ. Artois, UMR 8181 - UCCS - Unité de Catalyse et Chimie du Solide, F-59000 Lille, France.*

*b. Physical and Material Chemistry Division, CSIR-National Chemical Laboratory, Dr. Homi Bhabha Road, Pune 411008, Maharashtra, India.*

*E-mail: k.vanka@ncl.res.in*

*c. Univ. Lille, CNRS, INRA, Centrale Lille, Univ. Artois, FR 2638 – IMEC – Institut Michel-Eugène Chevreul, Lille, F-59000, France.*

*d. New address: Université de Strasbourg, Université de Haute-Alsace, Ecole Européenne de Chimie, Polymères et Matériaux, CNRS, LIMA, UMR 7042, 25 rue Becquerel, 67087 Strasbourg, France.*

*E-mail: cmichon@unistra.fr*

|                                                                              |           |
|------------------------------------------------------------------------------|-----------|
| <i>I) General methods and instrumentation.</i>                               | <i>2</i>  |
| <i>II) Additional experimental data.</i>                                     | <i>3</i>  |
| <i>III) Additional computational data</i>                                    | <i>10</i> |
| <i>IV) General procedures.</i>                                               | <i>23</i> |
| <i>V) Characterization of compounds.</i>                                     | <i>24</i> |
| <i>VI) References.</i>                                                       | <i>28</i> |
| <i>VII) <sup>1</sup>H, <sup>13</sup>C NMR spectra of isolated compounds.</i> | <i>30</i> |
| <i>VIII) Computational details</i>                                           | <i>46</i> |

## I) General methods and instrumentation.

All solvents were dried using standard methods and stored over molecular sieves (4 Å). All salts were weighted in a glovebox filled of Argon below 5 ppm of H<sub>2</sub>O and O<sub>2</sub>. All reactions were carried out under a dry nitrogen atmosphere and were repeated at least twice.

Analytical thin layer chromatography (TLC) was performed on Merck pre-coated 0.20 mm silica gel Alugram Sil 60 G/UV<sub>254</sub> plates.

Flash chromatography was carried out with Macherey silica gel (Kieselgel 60).

Gas chromatography analyses were done on GC Shimadzu 2010+ with FID detectors using Supelco SPB-5 column (30 m, 0.25 mm, 0.25 μm) and with nitrogen as gas carrier with tetradecane as internal standard.

GC-MS analyses were performed on a Shimadzu QP2010+ using Supelco column SLBTM-5ms (30 m, 0.25 mm, 0.25 μm).

Routine <sup>1</sup>H (300 MHz) and <sup>13</sup>C (75 or 125 MHz) NMR spectra were acquired on Bruker Avance spectrometers. Chemical shifts (δ) are reported downfield of Me<sub>4</sub>Si in ppm and coupling constants are expressed in Hz. 1,3,5-trimethoxybenzene and 1,2,4,5-tetrachlorobenzene were used as internal standards when needed.

HRMS-ESI analyses were performed on a ThermoFisher Scientific Exactive spectrometer with a resolution of 100.000 at PSM-GRITA-Pharm. Dept.-University Lille Nord de-France.

BARF salts were purchased from Strem or prepared as reported<sup>S1</sup> and subsequently dried under high vacuum (10<sup>-7</sup>mbar, 14h, 50°C). All BARF salts were stored and weighted in a glovebox.

Ester substrates were purchased and used as received or prepared following our general procedure.

## II) Additional experimental data: screenings

**Table S1. Screening of other catalysts and reaction conditions.**

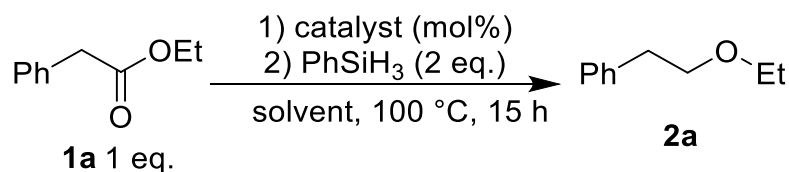

| Entry | Catalyst (mol%)                                                                             | Solvent              | Time (h) | Yield 2a (%) <sup>[a]</sup> |
|-------|---------------------------------------------------------------------------------------------|----------------------|----------|-----------------------------|
| 1     | Ph <sub>3</sub> CB(C <sub>6</sub> F <sub>5</sub> ) <sub>4</sub> (5) <sup>[c]</sup>          | TCE <sup>[b]</sup>   | 15       | 0                           |
| 2     | Ph <sub>3</sub> CB(C <sub>6</sub> F <sub>5</sub> ) <sub>4</sub> (5) <sup>[c]</sup>          | 1,4-dioxane          | 15       | 0                           |
| 3     | Ph <sub>3</sub> CB(C <sub>6</sub> F <sub>5</sub> ) <sub>4</sub> (5) <sup>[c]</sup>          | Anisole              | 15       | 0                           |
| 4     | Ph <sub>3</sub> CB(C <sub>6</sub> F <sub>5</sub> ) <sub>4</sub> (5) <sup>[c]</sup>          | (nBu) <sub>2</sub> O | 15       | 0                           |
| 5     | Ph <sub>3</sub> CB(C <sub>6</sub> F <sub>5</sub> ) <sub>4</sub> (5) <sup>[c]</sup>          | CPME <sup>[d]</sup>  | 15       | 19                          |
| 6     | Ph <sub>3</sub> CB(C <sub>6</sub> F <sub>5</sub> ) <sub>4</sub> (5) <sup>[c]</sup>          | decane               | 15       | 0                           |
| 7     | Ph <sub>3</sub> CB(C <sub>6</sub> F <sub>5</sub> ) <sub>4</sub> (5) <sup>[c]</sup> + KH (5) | TCE                  | 15       | 0                           |
| 8     | Ph <sub>3</sub> CB(C <sub>6</sub> F <sub>5</sub> ) <sub>4</sub> (5) <sup>[c]</sup> + KH (5) | Toluene              | 15       | 0                           |
| 9     | KOH                                                                                         | TCE                  | 15       | 0                           |
| 10    | KOH                                                                                         | Toluene              | 15       | 0                           |
| 11    | KH                                                                                          | TCE                  | 15       | 0                           |
| 12    | KH                                                                                          | Toluene              | 15       | 0                           |
| 13    | KCl                                                                                         | TCE                  | 15       | 0                           |
| 14    | KF                                                                                          | TCE                  | 15       | 0                           |
| 15    | KF                                                                                          | Toluene              | 15       | 0                           |
| 16    | KPF <sub>6</sub>                                                                            | TCE                  | 15       | 0                           |

<sup>[a]</sup> Determined by GC. <sup>[b]</sup> TCE: 1,1',2,2'-tetrachloroethane. <sup>[c]</sup> trityl tetra(pentafluorophenyl)borate. <sup>[d]</sup> CPME: cyclopentylmethylether.

**Table S2. Screening of hydrosilanes.**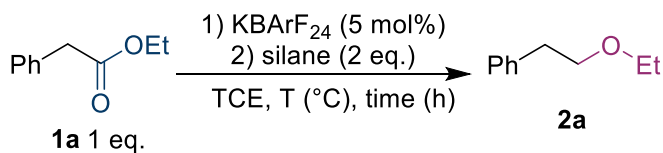

| Entry | Silane (eq.)                         | Time (h) | Yield <sup>a</sup> (%) |
|-------|--------------------------------------|----------|------------------------|
| 1     | PhSiH <sub>3</sub> (2)               | 15       | 100                    |
| 2     | PhSiH <sub>3</sub> (1)               | 15       | 31                     |
| 3     | PhSiH <sub>3</sub> (2)               | 6        | 95                     |
| 4     | Ph <sub>2</sub> SiH <sub>2</sub> (2) | 6        | 85                     |
| 5     | HexylSiH <sub>3</sub> (2)            | 6        | 86                     |
| 6     | PhMe <sub>2</sub> SiH (2)            | 6        | 44                     |
| 7     | TMDS (2)                             | 6        | 24                     |
| 8     | Et <sub>3</sub> SiH (2)              | 24       | 32                     |
| 9     | (EtO) <sub>3</sub> SiH (2)           | 24       | 0                      |
| 10    | Ph <sub>3</sub> SiH (2)              | 6        | 0                      |

[a] Determined by GC. [b] TCE: 1,1',2,2'-tetrachloroethane.

**Table S3. Screening of solvents.**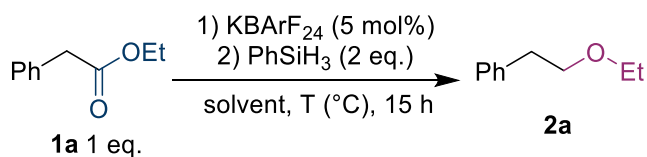

| Entry | Solvent                | T (°C) | Yield (%) <sup>[a]</sup> |
|-------|------------------------|--------|--------------------------|
| 1     | TCE <sup>[b]</sup>     | 100    | 100                      |
| 2     | TCE <sup>[b]</sup>     | 50     | -                        |
| 3     | Dichloromethane        | 40     | -                        |
| 4     | Toluene                | 100    | -                        |
| 5     | Anisole                | 100    | -                        |
| 6     | Tetrahydrofuran        | 65     | -                        |
| 7     | Cyclopentylmethylether | 100    | -                        |
| 8     | Dioxane                | 100    | -                        |
| 9     | Acetonitrile           | 100    | -                        |

[a] Determined by GC. [b] TCE: 1,1',2,2'-tetrachloroethane.

## NMR study

NMR experiments were performed on the following spectrometers:

- AvanceIII HD 600 equipped with a 5 mm cryo-probe HDCNF (CP-QCI) at 298 K and 343 K.
- AvanceIII 300 equipped with a 5 mm probe broad-band direct (BBO) at 298 K and 373 K.

The following experiments were performed : 1D-<sup>1</sup>H, 1D-<sup>1</sup>H{<sup>19</sup>F}, 1D-<sup>1</sup>H-TOCSY selective (*T*<sub>m</sub>=200 ms), 1D-<sup>1</sup>H-NOESY selective (*T*<sub>m</sub>=500 ms)

2D-<sup>1</sup>H-*T*1(*inversion recovery*), 2D-<sup>1</sup>H-DOSY,

1D-<sup>11</sup>B{<sup>1</sup>H}, 1D-<sup>11</sup>B{<sup>1</sup>H} (*inverse-gated*, DEPTH and Hahn echoes), 2D-<sup>1</sup>H-<sup>11</sup>B-HSQC(10 Hz),

1D-<sup>19</sup>F{<sup>1</sup>H}, 2D-<sup>19</sup>F-*T*1(*inversion recovery*), 2D-<sup>19</sup>F-DOSY,

1D-<sup>13</sup>C{<sup>1</sup>H/<sup>19</sup>F}, 1D-<sup>1</sup>H-<sup>13</sup>C-DEPT135(167 Hz), 1D-<sup>19</sup>F-<sup>13</sup>C-DEPT45(250 Hz), 2D-<sup>1</sup>H-<sup>13</sup>C-

HSQC(167 Hz), 2D-<sup>1</sup>H-<sup>13</sup>C-{<sup>19</sup>F}-HMBC(10 Hz), 2D-<sup>19</sup>F-<sup>13</sup>C-HSQC(250 Hz), 2D-<sup>19</sup>F-<sup>13</sup>C-

HMQC(250 Hz), 2D-<sup>19</sup>F-<sup>13</sup>C-HMBC(10 Hz),

2D-<sup>1</sup>H-<sup>29</sup>Si-HSQC(200 Hz), 2D-<sup>1</sup>H-<sup>29</sup>Si-HSQC-DEPT(200 Hz).

Three samples were studied:

- **sample A**: NaBArF<sub>24</sub> (1.12 mmol) in TCE-d<sup>2</sup> (0.6 mL, dry)
- **sample B**: NaBArF<sub>24</sub> (1.12 mmol) + PhSiH<sub>3</sub> (1 eq., 1.12 mmol) in TCE-d<sup>2</sup> (0.6 mL, dry)
- **sample C**: NaBArF<sub>24</sub> (1.12 mmol) + PhSiH<sub>3</sub> (10 eq., 11.2 mmol) in TCE-d<sup>2</sup> (0.6 mL, dry)

**Table S4.** <sup>1</sup>H and <sup>13</sup>C NMR data of samples **B** and **C** in TCE-d<sup>2</sup> at 343 K focusing on PhSiH<sub>3</sub>.

PhSiH<sub>3</sub>

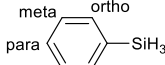

|                 |                        | H <sub>n</sub> Si<br>CS ( <sup>1</sup> H)<br>/ CS ( <sup>13</sup> C) | Ipso C<br><sup>2</sup> J (H <sub>Si</sub> -C <sub>i</sub> )<br>CS ( <sup>13</sup> C) | Ortho CH<br>CS ( <sup>1</sup> H)<br>/ CS ( <sup>13</sup> C) | Meta CH<br>CS ( <sup>1</sup> H)<br>/ CS ( <sup>13</sup> C) | Para CH<br>CS ( <sup>1</sup> H)<br>/ CS ( <sup>13</sup> C) |
|-----------------|------------------------|----------------------------------------------------------------------|--------------------------------------------------------------------------------------|-------------------------------------------------------------|------------------------------------------------------------|------------------------------------------------------------|
| <b>Sample B</b> | Major species <b>1</b> | 4.16<br>/ nd                                                         | -<br>128.2                                                                           | 7.55<br>/ 135.8                                             | 7.31<br>/ 127.9                                            | 7.36<br>/ 129.7                                            |
|                 | Minor species <b>2</b> | 5.19<br>/ nd                                                         | -<br>130.1                                                                           | 7.64<br>/ 133.8                                             | 7.40<br>/ ca.128.2                                         | 7.46<br>/ ca.131.0                                         |
| <b>Sample C</b> | Major species <b>1</b> | 4.15<br>/ -58.9                                                      | 4.4<br>128.1                                                                         | 7.55<br>/ 135.7                                             | 7.32<br>/ 127.9                                            | 7.37<br>/ 129.7                                            |
|                 | Minor species <b>2</b> | 5.18<br>/ -17.1                                                      | 8.8<br>130.0                                                                         | 7.64<br>/ 134.2                                             | 7.42<br>/ 128.3                                            | 7.45<br>/ 131.1                                            |

According to the <sup>1</sup>H and <sup>13</sup>C NMR data of samples **B** and **C** (Table S4), we observed 2 silane species in solution, a major **1** (PhSiH<sub>3</sub>) and a minor **2**, which were not in exchange. Trace amounts of other species were observed but not reported. Investigations by <sup>29</sup>Si NMR experiments failed in characterizing the species.

**Table S5.**  $^1\text{H}$ ,  $^{13}\text{C}$  and  $^{19}\text{F}$  NMR data of samples **A**, **B** and **C** (averaged values) in TCE- $d^2$  at 343 K focusing on  $\text{NaBArF}_{24}$ .

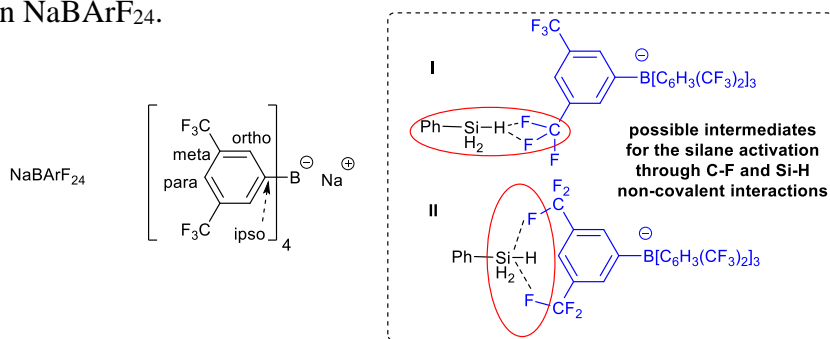

| Species                          | Ipso<br>C<br>CS ( $^{13}\text{C}$ ) | Ortho<br>CH<br>CS ( $^1\text{H}$ ) (d)<br>/ CS ( $^{13}\text{C}$ ) | Meta<br>C<br>CS ( $^{13}\text{C}$ )<br>/ $^2J(\text{C-F})$ | Meta<br>CF <sub>3</sub><br>CS ( $^{19}\text{F}$ )<br>/ CS ( $^{13}\text{C}$ )<br>/ $^1J(\text{C-F})$ | Para<br>CH<br>CS ( $^1\text{H}$ ) (t)<br>/ CS ( $^{13}\text{C}$ ) | Presence<br>in sample<br>(relative<br>abundance<br>Ref. 1.000) |
|----------------------------------|-------------------------------------|--------------------------------------------------------------------|------------------------------------------------------------|------------------------------------------------------------------------------------------------------|-------------------------------------------------------------------|----------------------------------------------------------------|
| <b>1</b><br>possible<br>adduct   | 141.8                               | 7.95<br>137.5                                                      | 131.8<br>33.6                                              | -62.7<br>122.9<br>273.8                                                                              | 8.16<br>126.4                                                     | B (0.65)<br>and<br>C (0.72)                                    |
| <b>2</b>                         | 150.0                               | 7.55<br>132.6                                                      | 131.0<br>33.0                                              | -62.5<br>123.5<br>273.5                                                                              | 7.77<br>120.7                                                     | B (0.40)                                                       |
| <b>3</b><br>$\text{NaBArF}_{24}$ | 161.5                               | 7.67<br>134.6                                                      | 128.7<br>31.4                                              | -62.0<br>124.5<br>273.2                                                                              | 7.49<br>117.3                                                     | A (1.00)<br>and B (1.00)<br>and C (1.00)                       |
| <b>4</b>                         | -                                   | 7.79<br>128.6                                                      | 131.4<br>33.4                                              | -62.6<br>123.2<br>272.8                                                                              | 7.84<br>122.3                                                     | A (0.11)<br>and B (0.20)<br>and C (0.12)                       |
| <b>5</b>                         | -                                   | 8.12<br>133.8                                                      | 131.5<br>33.4                                              | -62.62<br>23.1<br>273.3                                                                              | 8.02<br>125.2                                                     | A (0.12)                                                       |

According to the  $^1\text{H}$ ,  $^{13}\text{C}$  and  $^{19}\text{F}$  NMR data of samples **A**, **B** and **C** (Table S5), we observed 5 species in solution. Among the most abundant, **3** was the starting  $\text{NaBArF}_{24}$  and **1** may appear as a possible adduct between  $\text{NaBArF}_{24}$  and  $\text{PhSiH}_3$  (intermediates **I** and/or **II** vide supra Table S5). It was worth to note an exchange was observed between species **1** and **2**. Other species were minor compounds: **4** and **5** being impurities present with the  $\text{NaBArF}_{24}$  reagent and **2** being a transient intermediate only observed in sample **B**. By comparing species **3** ( $\text{NaBArF}_{24}$ ) and **1**, the latter showed the averaged para aromatic carbons and related protons comprised between the  $\text{CF}_3$  groups had deshielded chemical shifts respectively of about 10 ppm and 0.65 ppm (Table S5). While averaged ipso aromatic carbons bound to the boron atom were shielded of about 20 ppm, the related meta and ortho aromatic carbons as well as ortho protons had higher chemical shifts. Though these NMR features may suggest an adduct between  $\text{NaBArF}_{24}$  and  $\text{PhSiH}_3$  with possible interactions between the silane  $\sigma(\text{Si-H})$  and the borate  $\sigma(\text{C}_{\text{para-H}})$  and  $p(\text{C}_{\text{para}})$  orbitals (intermediates **I** and/or **II** vide supra Table S5), further interpretations proved to be difficult.

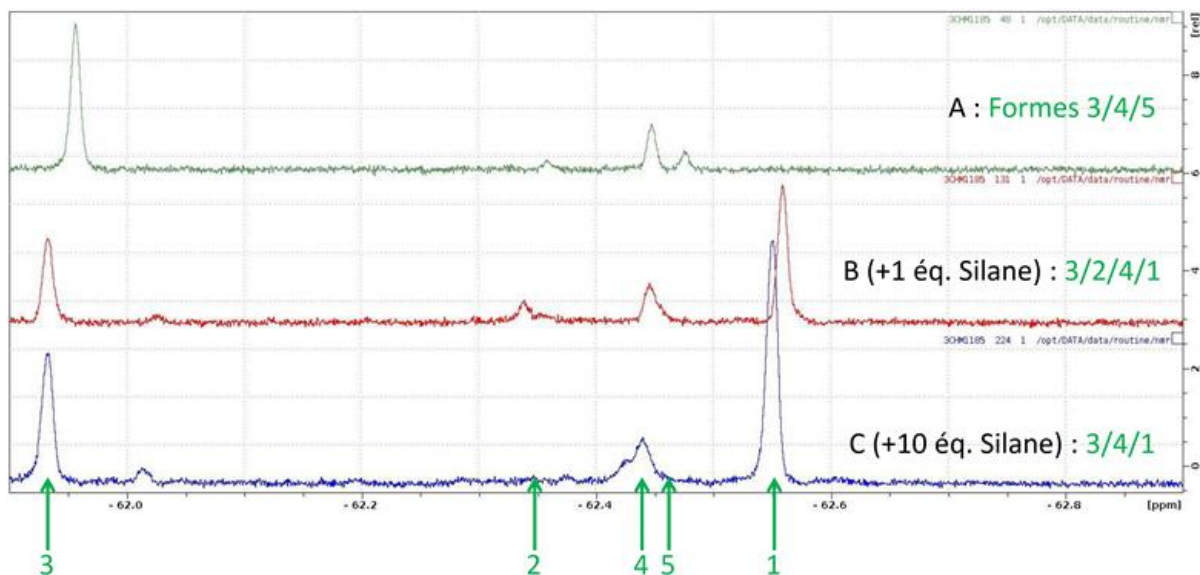

**Figure S1.**  $^{19}\text{F}\{\text{NON-}^1\text{H}\}$  NMR spectrum of samples **A**, **B** and **C** at 298 K. Species **3** is  $\text{NaBArF}_{24}$ . Species **1** is a possible adduct between  $\text{NaBArF}_{24}$  and  $\text{PhSiH}_3$ . Minor species **4** and **5** are impurities in the starting  $\text{NaBArF}_{24}$ . Species **2** appeared as an intermediate only present in sample **B**.

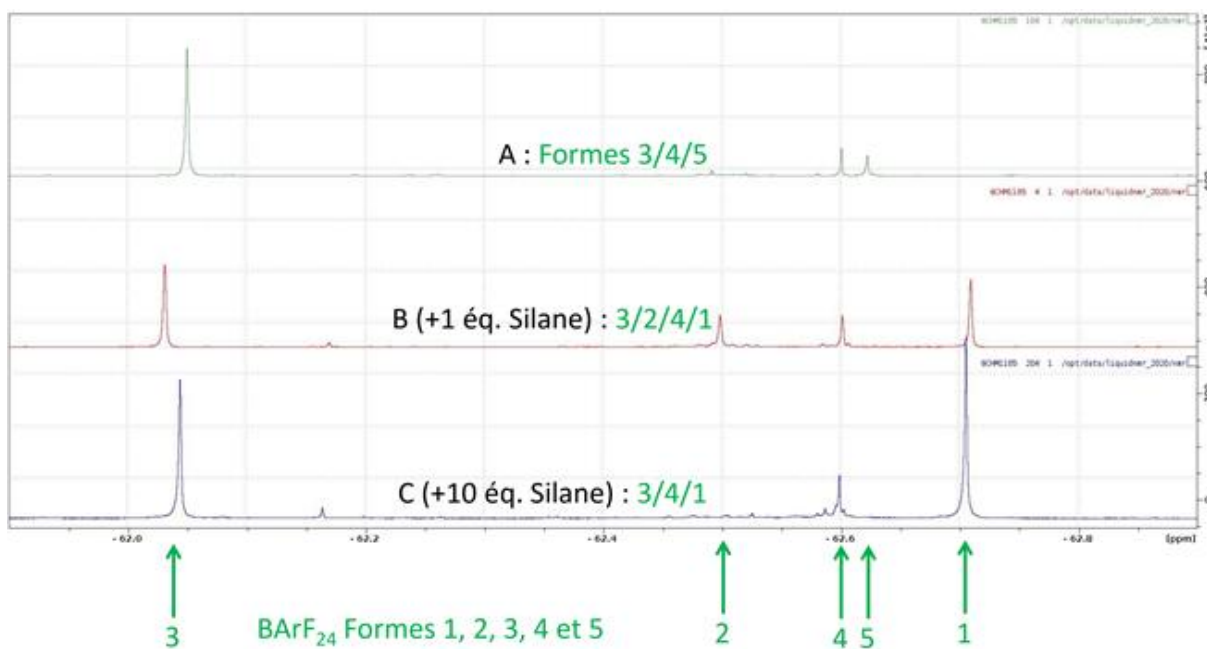

**Figure S2.**  $^{19}\text{F}\{^1\text{H}\}$  NMR spectrum of samples **A**, **B** and **C** at 343K. Species **3** is  $\text{NaBArF}_{24}$ . Species **1** is a possible adduct between  $\text{NaBArF}_{24}$  and  $\text{PhSiH}_3$ . Minor species **4** and **5** are impurities in the starting  $\text{NaBArF}_{24}$ . Species **2** appeared as an intermediate only present in sample **B**.

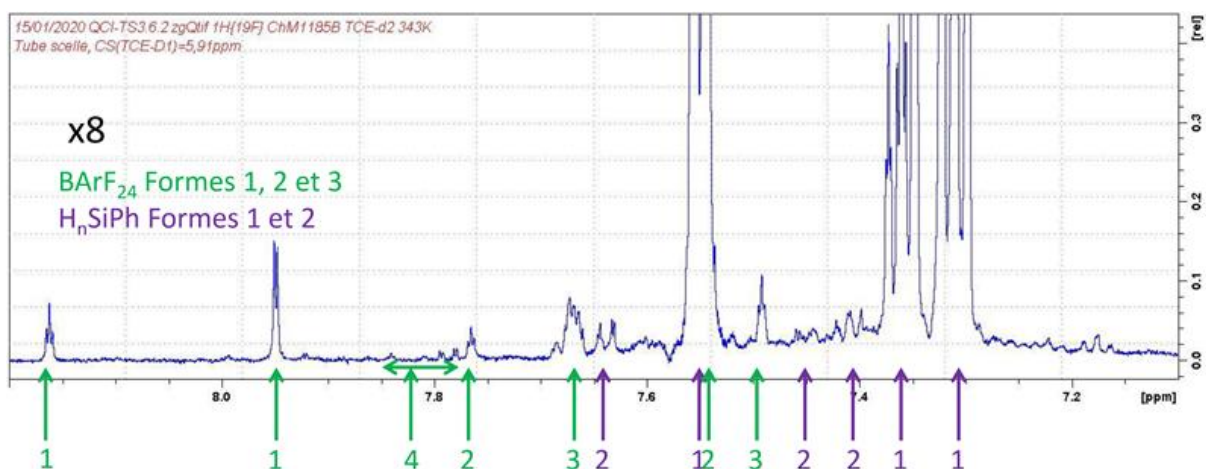

**Figure S3:**  $^1\text{H}\{^9\text{F}\}$  NMR spectrum (aromatic H) of sample **B** at 343K. Species **3** is  $\text{NaBArF}_{24}$ . Species **1** is a possible adduct between  $\text{NaBArF}_{24}$  and  $\text{PhSiH}_3$ . Minor species **4** and **5** are impurities in the starting  $\text{NaBArF}_{24}$ . Species **2** appeared as an intermediate only present in sample **B**.

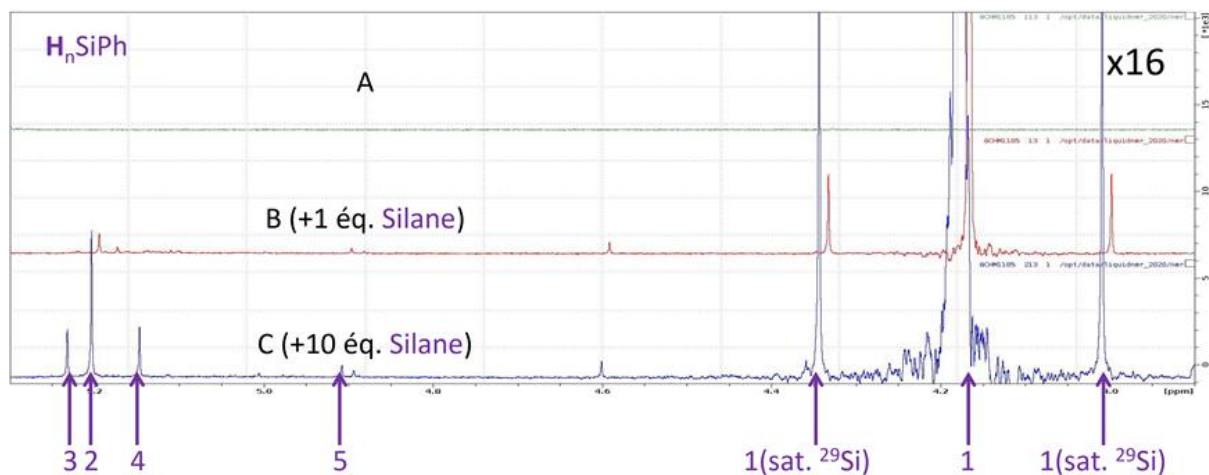

**Figure S4:**  $^1\text{H}\{^9\text{F}\}$  NMR spectrum (aliphatic H) of samples **A**, **B** and **C** at 343K. Species **3** is  $\text{NaBArF}_{24}$ . Species **1** is a possible adduct between  $\text{NaBArF}_{24}$  and  $\text{PhSiH}_3$ . Minor species **4** and **5** are impurities in the starting  $\text{NaBArF}_{24}$ . Species **2** appeared as an intermediate only present in sample **B**.



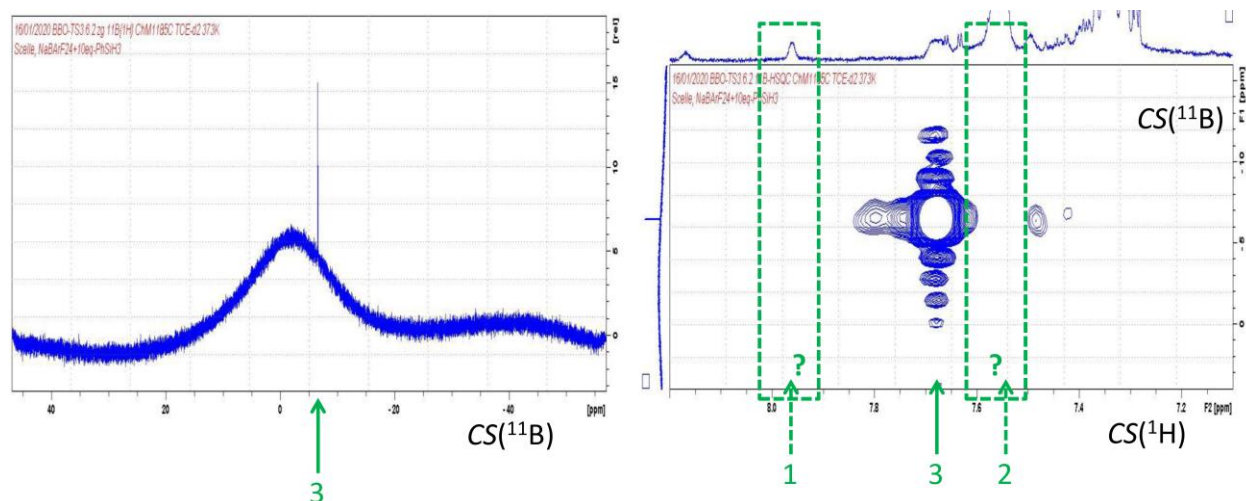

**Figure S5.**  $^{11}\text{B}\{^1\text{H}\}$ NMR spectrum of sample G (left). Same versus a 1D- $^1\text{H}$  spectrum non decoupled of  $^{19}\text{F}$  (right).

It was worth to note the boron of species **3** was the single observed in spite the existence of species **1** and **2** in similar abundance. The boron signal of species **3** is fine and proves the boron atom is in a tetrahedral environment. This might suggest the boron atoms of species **1** and **2** don't have a strict tetrahedral geometry and would imply unidentified broader signals which can be hardly resolved from the broad signals issued from the NMR tube (pyrex) and the probe glassware.

The couplings of the ortho 1H from species **1** (doublet at 7.95 ppm) and **2** (hidden under the silane) are clearly different from the one of species **3** (broad multiplet at 7.67 ppm).

### III) Additional computational data:

All the calculations in this study have been performed with density functional theory (DFT), with the aid of the Turbomole 7.1 suite of programs,<sup>S2</sup> using the PBE functional<sup>S3</sup>. The TZVP<sup>S4</sup> basis set has been employed. The resolution of identity (RI),<sup>S5</sup> along with the multipole accelerated resolution of identity (marij)<sup>S6</sup> approximations have been employed for an accurate and efficient treatment of the electronic Coulomb term in the DFT calculations. Solvent corrections were incorporated with optimization calculations using the COSMO model<sup>S7</sup>, with 1,1,2,2-tetrachloroethane ( $\epsilon = 8.2$ ) as the solvent. For the solvent free systems, the calculations were done without solvent correction. In addition, the intrinsic reaction coordinate (IRC)<sup>S8</sup> calculations were done with all the transition states in order to further confirm that they were the correct transition state, yielding the correct reactant and product structures. The values reported are  $\Delta G$  values, with zero-point energy corrections, internal energy and entropic contributions included through frequency calculations on the optimized minima, with the temperature set to 298.15 K. The translational entropy term in the calculated structures was corrected through a free volume correction introduced by Mammen *et al.*<sup>S9</sup> This volume correction is to account for the unreasonable enhancement in translational entropy that is generally observed in computational softwares. Harmonic frequency calculations were performed for all stationary points to confirm them as local minima or transition state structures. Then, in order to find the efficiency of the catalytic cycle in our mechanism, we have calculated the relative efficiency with the AUTOFS<sup>S10,S11</sup> program by employing the “Energetic Span Model” (ESM), on all the free energy profiles discussed in the manuscript. The turn over frequency (TOF) calculations take into account the principal rate-determining transition state, potentially rate-influencing transition states and intermediates during the catalysis process. The TOF were calculated by the following equation:

$$\text{TOF} = \frac{k_{\text{BT}}}{h} e^{-\delta E/RT}$$

$$\delta E = \text{TTDTS} - \text{TTDI} \quad \text{If TDTs appears after TDI}$$

$$\delta E = \text{TTDTS} - \text{TTDI} - \Delta G_r \quad \text{If TDTs appears before TDI}$$

This model has been employed to calculate the TOFs for the free energy profiles obtained for the mechanisms in solvent phase discussed in the manuscript. This model can also be employed for stoichiometric reactions, where the TOF would correspond to the efficiency of the reaction.

The nature of the interaction in intermediate species was investigated with the natural bond orbital (NBO) analysis procedures as implemented in the Gaussian 09 program. The analysis was performed at the PBEPBE/TZVP optimized geometry using the PBEPBE density functional together with the all electron TZVP basis set.

In order to gain insight into the interaction of the catalyst with the substrate moiety, the intermolecular charge transfer in the complex has been analysed with the natural bond orbital (NBO) analysis. The energetic estimate of donor (i) – acceptor (j) orbital interactions can be obtained by the second order perturbation theory analysis of the Fock matrix in the NBO basis.

The donor–acceptor interaction energy  $E(2)$  is given by

$$E(2) = \Delta E(i,j) = q(i,j)F(i,j)^2 / \{\varepsilon(i) - \varepsilon(j)\}$$

Where  $q(i)$  is the donor orbital occupancy,  $\varepsilon(i)$  and  $\varepsilon(j)$  are the diagonal elements (orbital energies), and  $F(i,j)$  is the off-diagonal NBO Fock matrix element. In the present investigation, the important interactions between the  $K^+$  ion of the catalyst and the oxygen atoms of the substrate have been analyzed.

### NCI analysis.

The NCI plot<sup>S12</sup> iso-surfaces have recently been used to characterize noncovalent interactions. They correspond to both favourable and unfavourable interactions, as differentiated by the sign of the second-density Hessian eigenvalue and defined by the isosurface color. The color scheme is a red yellow-green-blue scale with red for  $\rho_{\text{cut}}^+$  (repulsive) and blue for  $\rho_{\text{cut}}^-$  (attractive).<sup>S13</sup> The Turbomole 7.1 suite of programs, using the PBE / TZVP level of theory, has been used to generate the NCI plot.

For **Intermediate\_2**, we have computed the NCI plot which is represented in Figure S6 and Figure S7. Several small and green isosurfaces that characterize weak non-covalent interactions throughout the catalyst and the reactant in **Intermediate\_2** can be observed. The green isosurfaces, which are of the interest, have been circled with red and further marked with white arrows. Hence, these isosurfaces clearly indicate an attractive interaction between the  $\text{K}^+$  of the catalyst and the two oxygens of the ester reactant, as shown in Figure S6. Similarly, the weak interactions between the C-F and Si-H bonds have been shown by green isosurfaces circled in red in Figure S7.

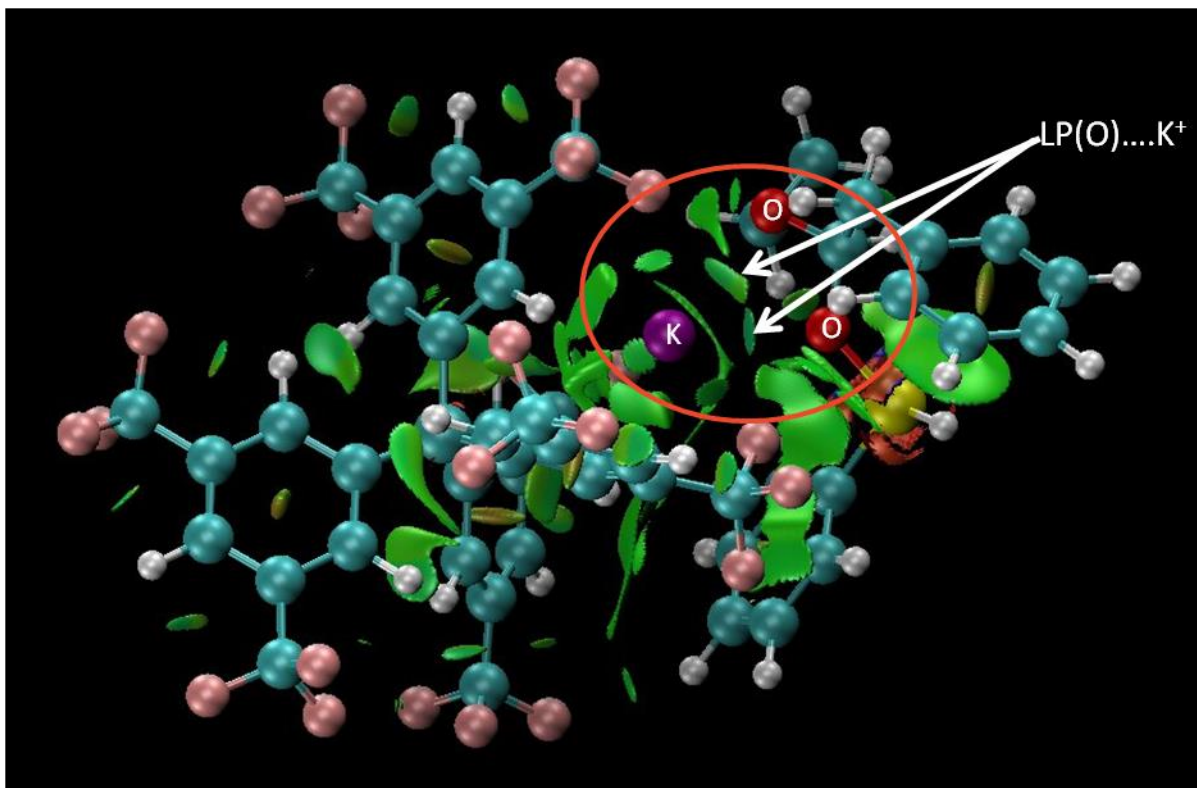

**Figure S6.** Visualized non-covalent interactions in **Intermediate\_2** between the  $\text{K}^+$  of the catalyst and both the oxygens of the ester reactant.

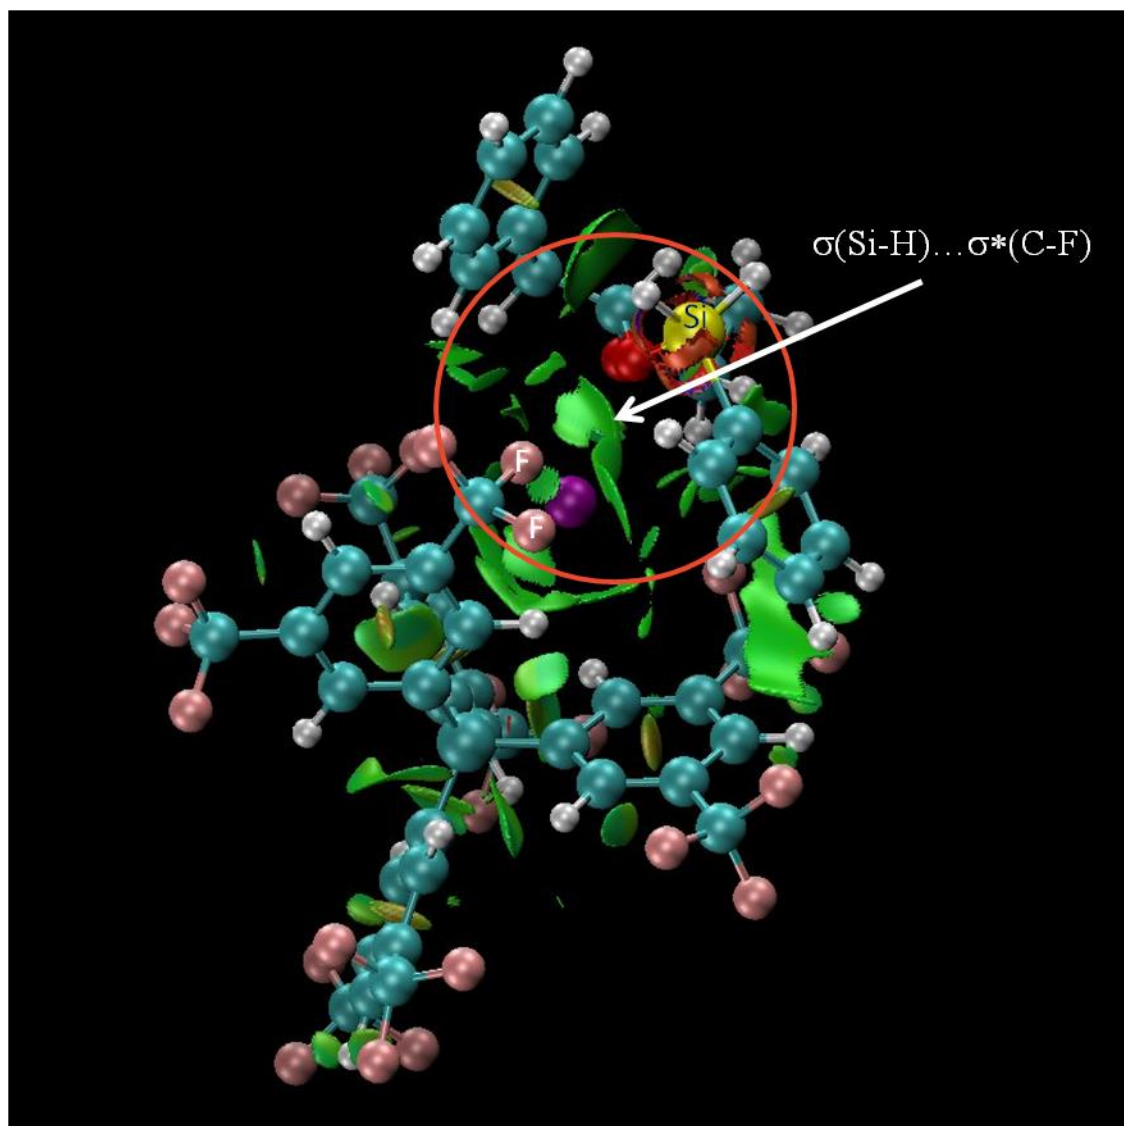

**Figure S7.** Visualized non-covalent interactions in **Intermediate\_2** between the C-F and the Si-H bonds.

### NBO analysis

NBO analysis has been employed in order to understand the role of the cation ( $K^+$ ) in the catalysis (see Figure S8, Table S6 and the SI for details). We have focused on the 2<sup>nd</sup> order perturbation energy extracted from the NBO analysis to figure out about the possible non-covalent interaction between two separate moieties. In the present study, an interaction of interest is between the  $K^+$  ion of the  $K\text{BArF}_{24}$  catalyst and the oxygen atom of the ester reactant.<sup>S14</sup> From the interaction energy values (28.5 kcal/mol and 38.7 kcal/mol shown in Table S6, entries 1 and 2) and the NBO images (shown in Figure S8), it is clear that there is a moderate to high overlap between  $K^+$  and oxygen of the ester reactant. Furthermore, we have also looked at the orbital interaction between the Si center of the silane reagent with the fluorine atoms of the  $K\text{BArF}_{24}$  catalyst.<sup>S15</sup> We have seen one weaker interaction (19.0 kcal/mol shown in Table S6, entries 3 and 4) and one comparatively stronger interaction (58.2 kcal/mol) between the Si-H bond of the silane reagent and the C-F bond of the  $K\text{BArF}_{24}$  catalyst (shown in Figure S9).

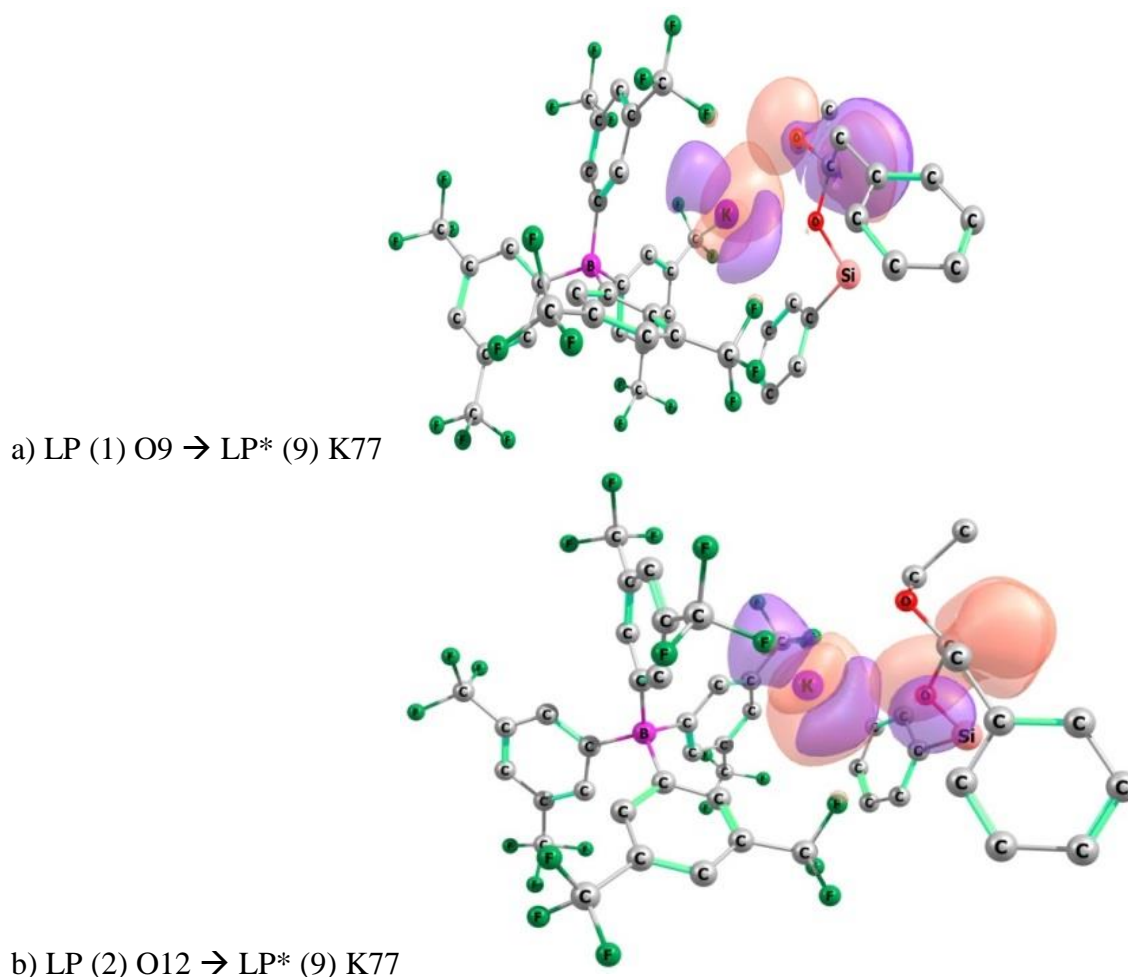

**Figure S8.** Second order perturbation theory analysis of the Fock matrix in NBO basis showing the important interactions between the  $K^+$  ion of the catalyst and the oxygen atom of the reactant species: a) LP (1) O9  $\rightarrow$  LP\* (9) K77, b) LP (2) O12  $\rightarrow$  LP\* (9) K77.

**Table S6.** Interaction energy values from the NBO analysis for: the interaction between the K<sup>+</sup> ion of the catalyst and the oxygen atom of the reactant species (entries 1 and 2) and the interaction between the Si center of the substrate with the fluoride of the catalyst (entries 3 and 4).

| Entry | Donor(i)        | Occupancy | Acceptor(j)     | Occupancy | E2   |
|-------|-----------------|-----------|-----------------|-----------|------|
| 1     | LP (1) O9       | 1.95      | LP* (9) K77     | 0.005     | 28.5 |
| 2     | LP (2) O12      | 1.89      | LP* (9) K77     | 0.005     | 38.7 |
| 3     | BD (1) Si13-H78 | 1.98      | BD* (1) C58-F62 | 1.97      | 58.2 |
| 4     | BD (1) Si13-H78 | 1.98      | BD* (1) C58-F61 | 1.95      | 19.0 |

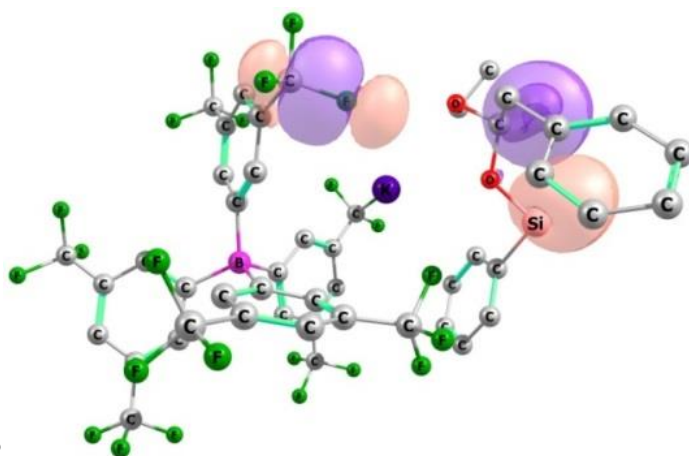

a) BD (1) Si13 - H78  $\rightarrow$  BD\* (1) C58 - F62

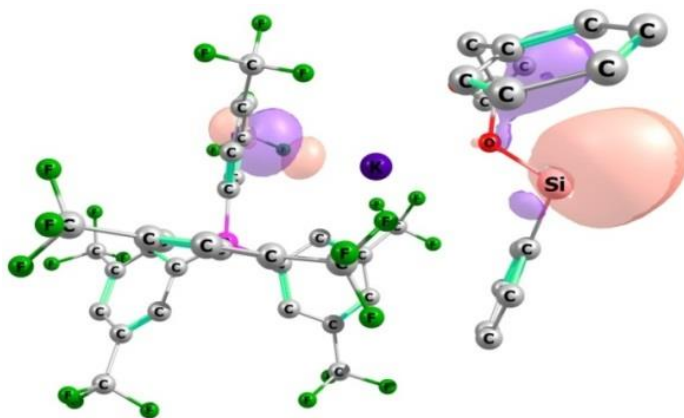

b) BD (1) Si13 - H78  $\rightarrow$  BD\* (1) C58 - F61

**Figure S9.** Second order perturbation theory analysis of the Fock matrix in NBO basis showing the important interaction between Si center of the substrate with the fluoride of the catalyst: a) BD (1) Si13 - H78  $\rightarrow$  BD\* (1) C58 - F62 and b) BD (1) Si13 - H78  $\rightarrow$  BD\* (1) C58 - F61.

## Reaction mechanism in presence of KBarF<sub>24</sub> catalyst.

In order to understand the mechanism of this reductive deoxygenation reaction, we have performed full quantum chemical calculations using density functional theory (DFT) at the PBE/TZVP level of theory. In the first step of the reaction, PhSiH<sub>3</sub> forms a metastable complex with the KBarF<sub>24</sub> catalyst (Figure S10). The potassium cation of the catalyst shows a cation- $\pi$  interaction with the phenyl group attached to Si and the resulting complex is additionally stabilized by the weak interactions between the Si center of the reagent and the fluoride atoms of the BARF<sub>24</sub> anion (see the NBO analysis Figure S8 and Table S6). The reaction free energy ( $\Delta G$ ) for this complex formation is 1.1 kcal/mol. In the second step of the reaction, both oxygens of the ester reactant show moderate to weak interactions with the potassium cation,<sup>S14</sup> whereas weak interactions between C-F and Si-H bonds<sup>S15</sup> have also been found (Figure S10 and see the NBO analysis Figure S9 and Table S6).

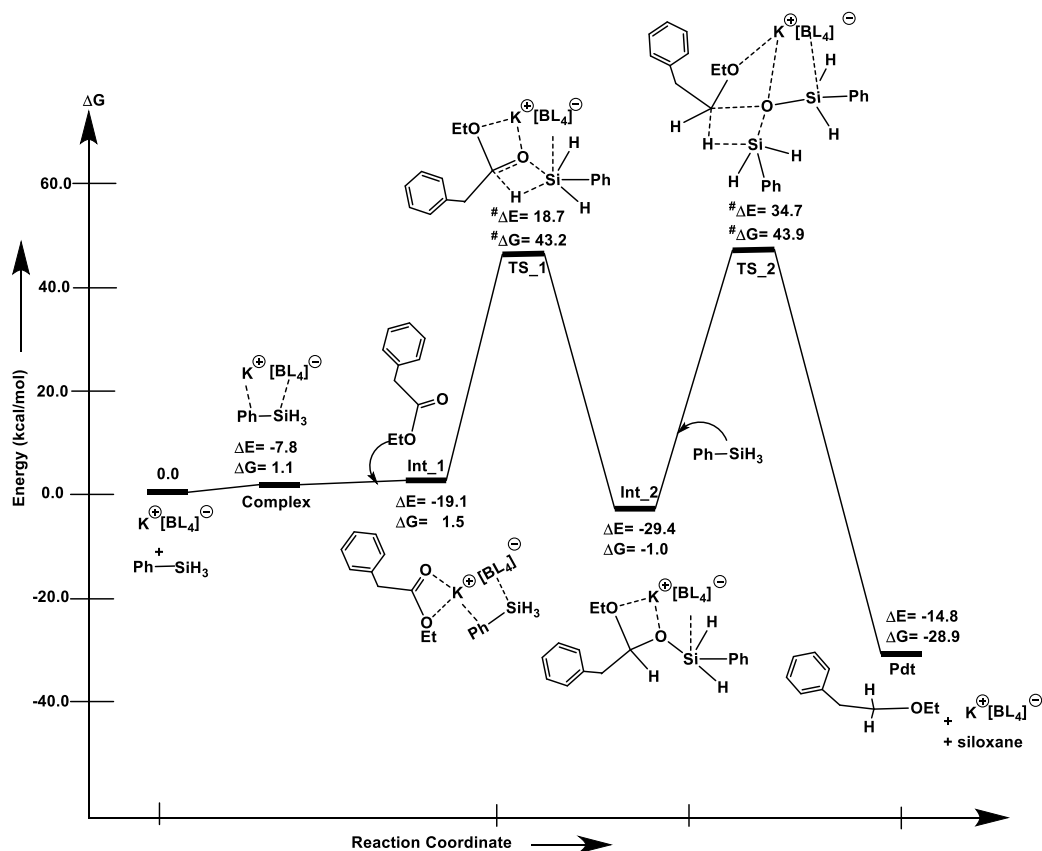

**Figure S10.** The reaction profile for the desired reductive deoxygenation of esters to ethers through hydrosilylation in the presence of catalyst. The values (in kcal/mol) have been calculated at the PBE/TZVP level of theory at 298 K. At 373K, barriers were higher: TS<sub>1</sub> = 54.1 kcal/mol (373 K) and TS<sub>2</sub> = 49.3 kcal/mol (373 K) [gas phase values]. In the liquid phase, the barriers calculated at 373 K were also higher: TS<sub>1</sub> = 54.1 kcal/mol (373 K) and TS<sub>2</sub> = 49.3 kcal/mol (373 K).

These non-covalent interactions are further supported by results from visualization with the NCI plot (see Figures S6 and S7). All these interactions lead to the formation of intermediate Int<sub>1</sub> with



a reaction free energy ( $\Delta G$ ) of 1.5 kcal/mol. Additional calculations with  $\text{nhexylSiH}_3$ , another possible hydrosilane, indicated the intermediate Int\_1 was thermodynamically less stable by 6.0 kcal/mol which is acceptable under the given reaction conditions. By comparison to the regular silane activation modes operating through oxidative addition, cooperation metal-ligand, double activation metal-substrate or heterolytic polar electrophilic activation,<sup>S16</sup> our catalytic reaction relies on a silane activation through noncovalent interactions. Though it may appear similar to the already reported examples using frustrated Lewis pairs as catalysts,<sup>S17,S18</sup> it apparently proceeds in a different way. It is worth to note that an intermediate involving a cation – pi interaction between the potassium and the phenyl group attached to the ester reagent is not favourable (see the mechanism S1 and Figures S10, S12). Moreover, a pentavalent silicon intermediate resulting from the coordination of one oxygen atom of the ester to the silicon centre of phenylsilane is not stable and therefore not considered further (see the mechanism S2 and Figures S10, S12).

In the next step, intermediate Int\_2 formation takes place *via* a four-membered transition state TS\_1 implying the ester reagent and a first molecule of phenylsilane and shows the most favourable calculated activation free energy barrier at 43.2 kcal/mol<sup>S19</sup> (Figures S10 and S12, Scheme S1). It is worth noting that the  $\Delta G$  corresponding to the energy barriers have been calculated at room temperature and the obtained values may appear high even after volume corrections for the translational entropy term. This is due to the overestimation of the entropy loss during the reaction in the calculations. The real values of the energy barriers are, therefore, likely to be lower.

Further calculations of the barriers at 373 K led to higher values by comparison to the barriers calculated at 298 K: 48.1 kcal/mol for TS\_1 (instead of 43.2) and 46.3 kcal/mol for TS\_2 (instead of 43.9) [gas phase]. Moreover, while considering possible interactions of solvent with the reagents and catalyst, the barriers calculated at 373 K were also higher: 54.1 kcal/mol for TS\_1 (instead of 43.2) and 49.3 kcal/mol for TS\_2 (instead of 43.9) [liquid phase].

Transition state TS\_1 implies the hydride from the silane reagent is transferred to the carbonyl carbon of the ester reactant reducing the C=O double bond into a single bond with formation of the Si-O bond. For this step, the reaction free energy ( $\Delta G$ ) is highly favourable, by 2.5 kcal/mol, leading to the formation of intermediate Int\_2. It is also relevant that a transition-state based on a single cation–pi interaction of the potassium with the phenyl group of the silane leads to a highly unfavourable energy barrier (see the mechanism S3 and Scheme S1).

In the last step of the reaction mechanism, the second phenylsilane reagent molecule is also added, and makes another four membered transition state TS\_2 implying the partially reduced ester reagent as acetal and a second molecule of phenylsilane from intermediate Int\_2 with an activation free energy barrier of 43.9 kcal/mol (Figure S10). In this transition state, the hydride of the phenyl silane is transferred to the carbon of the ester group to break simultaneously the C-O bond and form the reduced ether product along with the siloxane co-product and the regenerated catalyst. It is worth to note the C-O-Si bond is preferentially cleaved as respect to the C-O-Et bond. The thermodynamics study suggests that the formation of the ethylether product is more stable by 5.8 kcal/mol in comparison to the silylated ether, and the energy barrier for the formation of the ethylether product is also lower by 8.9 kcal/mol (Figures S10, S12). Hence, the reaction free energy ( $\Delta G$ ) for the product formation step is of 28.9 kcal/mol. Considering the favourable value of the turnover frequency (TOF) ( $8.30 \times 10^5$  times of the efficiency than the non-catalyst case, Table S4), obtained from the calculations with the Energetic Span Model (ESM) which allows to consider the whole mechanism kinetics as well as thermodynamics,<sup>S20</sup> we can conclude the reductive deoxygenation reaction may be feasible under the experimental reaction conditions.

In order to understand the solvent effect, the calculations done with TCE have also been performed with toluene (Figure S11). This solvent does not allow the reaction to proceed experimentally and is also not favourable according our calculations. In addition, turn over frequency (TOF) have been calculated using the Energetic Span Model (ESM) which allows to consider the whole mechanism kinetics as well as thermodynamics.<sup>S20</sup> The relative efficiency values with and without catalyst (respectively  $5.9 \cdot 10^{-21} \text{ s}^{-1}$  and  $7.1 \cdot 10^{-27} \text{ s}^{-1}$ ) indicate that the mechanism with catalyst is approximately  $8.30 \cdot 10^5$  times more efficient than the corresponding mechanism without catalyst in the solvent phase. We also observe the reaction in TCE solvent is favoured being  $3.7 \cdot 10^6$  times more efficient than in toluene (table S7).

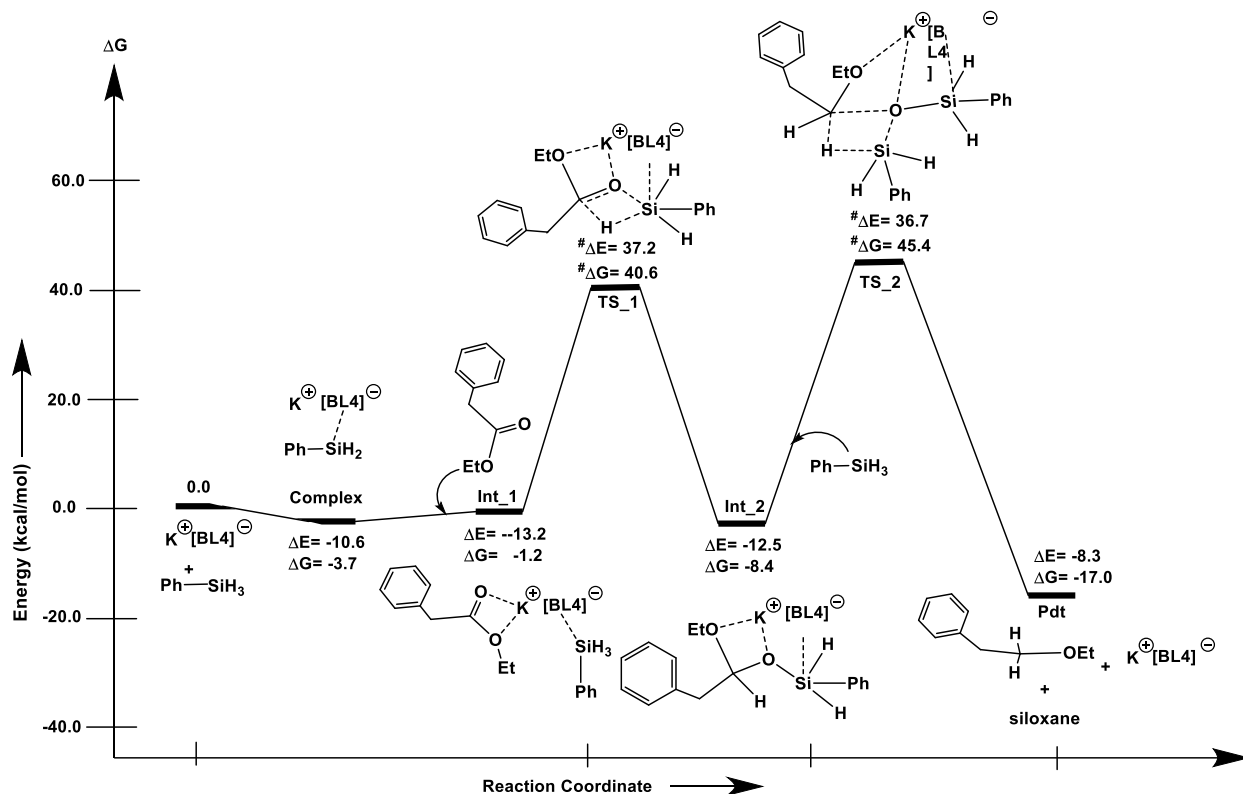

**Figure S11.** The reaction profile for the desired reductive deoxygenation of esters to ethers through hydrosilylation in the presence of catalyst in toluene solvent. The values (in kcal/mol) have been calculated at the PBE/TZVP level of theory (gas phase).

**Table S7.** The values for the relative efficiency obtained for both the mechanisms in the solvent phase.

| Mechanism                            | Relative Efficiency             |
|--------------------------------------|---------------------------------|
| With the catalyst in TCE solvent     | $5.9 * 10^{-21} \text{ s}^{-1}$ |
| With the catalyst in Toluene solvent | $2.2 * 10^{-27} \text{ s}^{-1}$ |
| Without the catalyst in TCE solvent  | $7.1 * 10^{-27} \text{ s}^{-1}$ |

The relative efficiency values indicate that the mechanism with catalyst is approximately  $8.3 * 10^5$  times more efficient than the corresponding mechanism without catalyst in the TCE solvent, and is also  $2.7 * 10^6$  times more efficient than in toluene solvent.

### Reaction mechanism in absence of catalyst.

In order to probe our theoretical study, we have also investigated the mechanism without the catalyst (see Figure S12). In the first step, the reactants (ester and PhSiH<sub>3</sub>) form intermediate\_1 via a four-membered transition state TS\_1 with an activation free energy barrier of 53.1 kcal/mol. The activation energy barriers of transition state TS\_1 for the two cases: “with-catalyst” and “without-catalyst”, are 43.2 kcal/mol and 53.1 kcal/mol respectively. This suggests that the case without catalyst, where the barrier is ~10.0 kcal/mol higher than the catalytic pathway, is unfavourable and unlikely to take place under the experimental reaction conditions. As control experiments confirm this result (see table 1, entry 10), we have concluded the reductive deoxygenation reaction proceeds exclusively in the presence of the catalyst.

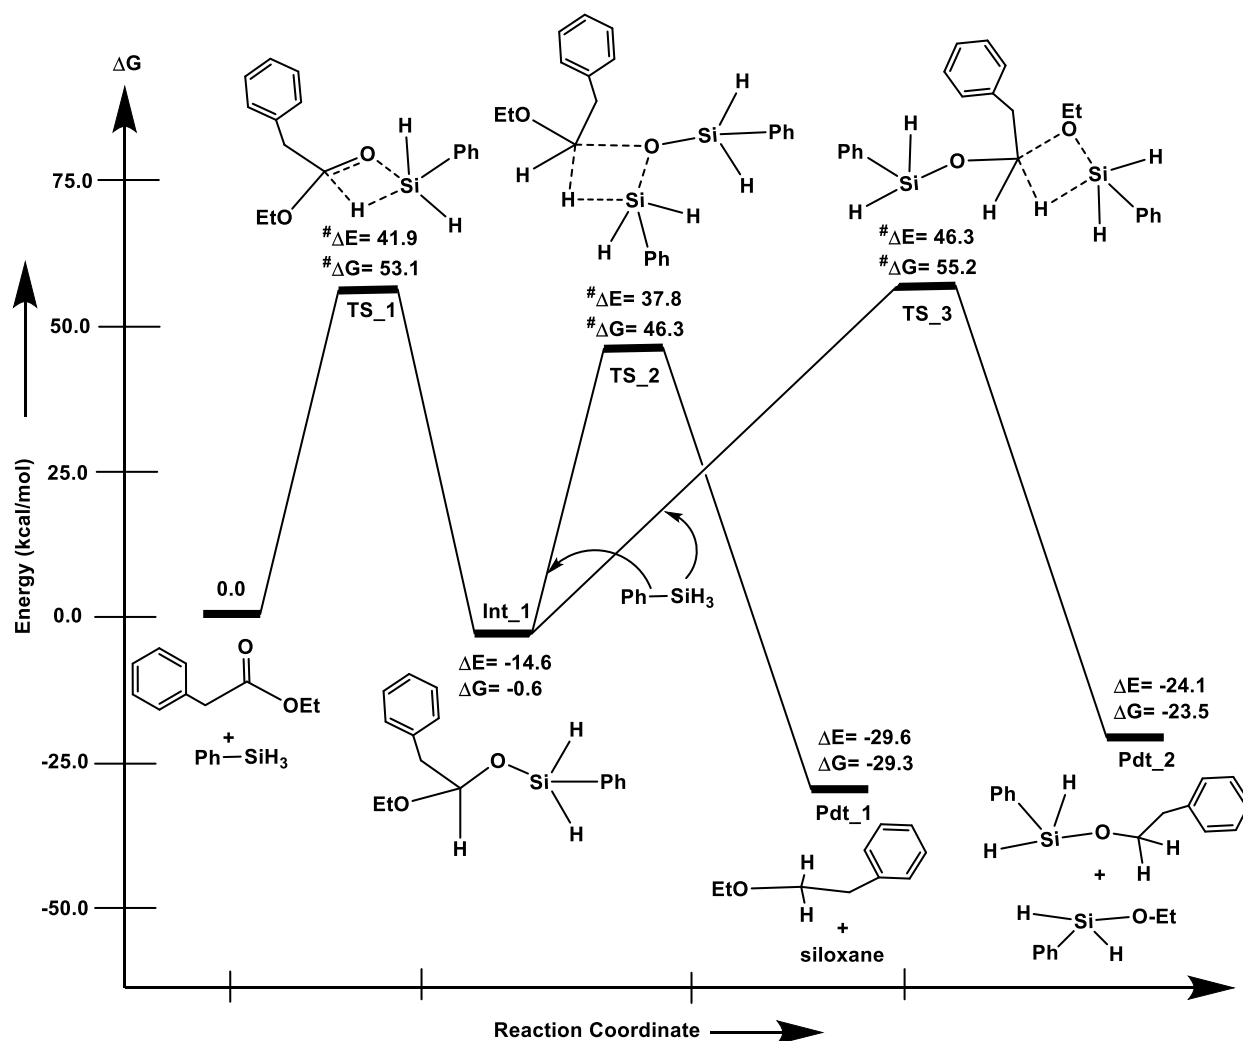

**Figure S12.** The two possible reaction profiles for the reductive deoxygenation of esters to ethers (ethyl- or silyl-ether) through hydrosilylation in the absence of catalyst. The values (in kcal/mol) have been calculated at the PBE/TZVP level of theory (gas phase).

The second reduction step has two possibilities. The first, also proposed in the mechanism Figure S10, implies the cleavage of the C-O-Si bond. The second results in the cleavage of the C-O-Et bond. The study of the thermodynamics suggests that the product, **Pdt\_1**, formation is more

favourable by 5.9 kcal/mol over **Pdt\_2** formation, and that the barrier is 8.9 kcal/mol lower as well. This indicates that the cleavage of the C-O-Si bond would be the preferred one.

**Discarded reaction mechanism S1.** (see Figure S12)

In the first step, the phenyl group attached to reactant ester shows the cation – pi interaction with the catalyst. This is not feasible as the reaction free energy ( $\Delta G$ ) of this step is 11.7 kcal/mol. In the next step, the Si of PhSiH<sub>3</sub> shows weak interaction with the fluorine of the complex. The reaction free energy ( $\Delta G$ ) of this step is unfavourable by 16.6 kcal/mol. Hence this mechanism has been discarded.

**Discarded reaction mechanism S2.** (see Figure S12)

In this mechanism, the catalyst and PhSiH<sub>3</sub> form a complex as proposed in Mechanism 1. In the second step, the oxygen atom of the ester substrate and the Si of PhSiH<sub>3</sub> reagent bind together to form a pentavalent Si. However, it has been observed that the Si has no coordination with the oxygen atom of the ester, which means such a pentavalent Si is not stable. Hence, this mechanism has also been discarded.

**Discarded reaction mechanism S3.** (see Scheme S1)

In the first step, PhSiH<sub>3</sub> forms a metastable complex with the catalyst. The potassium cation of the catalyst shows cation – pi interaction with the phenyl group attached to Si and the complex is more stabilized by the weak interaction between the Si and the F of the catalyst. The reaction free energy ( $\Delta G$ ) for this complex formation is 3.3 kcal/mol (calculated without volume correction). In the second step, the ester approaches towards the complex and goes through a four-membered transition state (ts\_1) where the hydride is transferred from the Si center to the carbonyl carbon of the ester and the C=O double bond converts into a single bond, along with the formation of the Si-O bond, which leads to Int\_1. If the reaction free energy ( $\Delta G$ ) of this step is favourable by 1.5 kcal/mol, the activation energy barrier ( $\Delta G^\ddagger$ ) is 63.2 kcal/mol, which is highly unfavourable. Indeed, the activation energy barrier for formation of int\_1 calculated in the absence of catalyst was found to be 54.8 kcal/mol. Therefore, such energy value implies that this reaction should go through a different pathway.

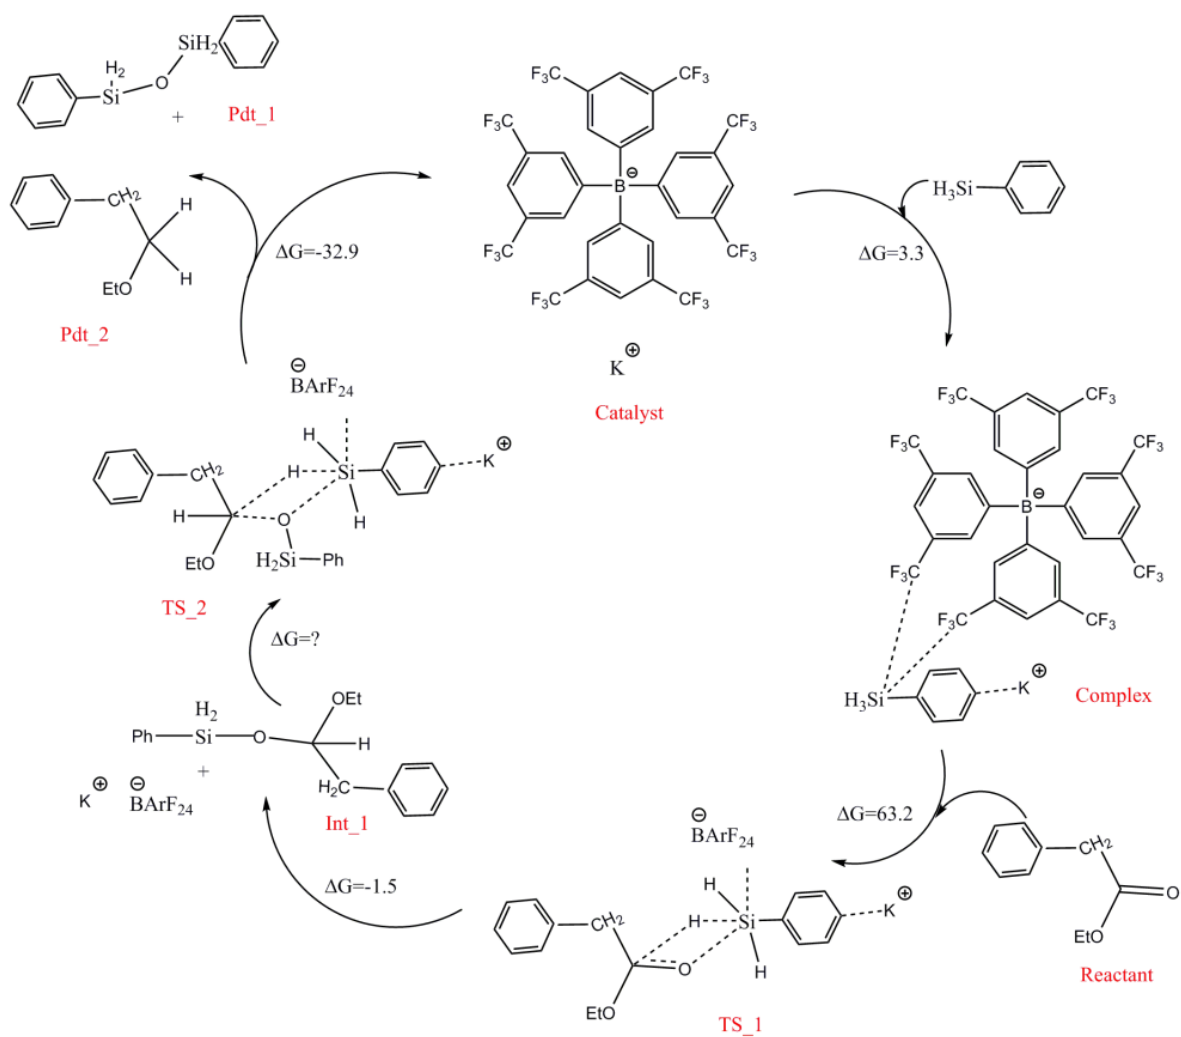

**Scheme S1.** Discarded reaction mechanism S3. The values (in kcal/mol) have been calculated at the PBE/TZVP level of theory without volume correction (gas phase).

#### **IV) General procedures**

##### **General procedure for the synthesis of esters:**

The selected carboxylic acid (1 eq.) is dissolved in absolute ethanol (100 mL) with concentrated H<sub>2</sub>SO<sub>4</sub> (5 mol%) and the resulting solution is refluxed for 15 hours under stirring. After cooling and evaporation of the solvent under vacuum, the resulting residue is dissolved in dichloromethane and washed 3 times with a 1M aqueous solution of NaOH. The organic phase is then dried over MgSO<sub>4</sub> and evaporated under vacuum to afford the expected ester in quantitative yield.

##### **General procedure for the catalysed reductive deoxygenations of esters:**

In a glovebox, KBarF<sub>24</sub> (2 mol%) is transferred in a Schlenk tube. Then, under a nitrogen flow, anhydrous tetrachloroethane (2 mL), the selected ester (0.15 mmol, 1 eq.) and phenylsilane (0.3 mmol, 2 eq.) are respectively added through syringues and the resulting solution is heated at 100°C under stirring for 15 hours. Afterwards, the resulting solution is subsequently evaporated under vacuum and the residue is dissolved in dichloromethane and washed with brine. The organic phase is then dried over MgSO<sub>4</sub> and evaporated under vacuum to afford the crude product which was directly purified by flash chromatography on silica gel or by preparative TLC.

## V) Characterization of compounds.

### (2-ethoxyethyl)benzene 2a/2c/2s CAS [1817-90-9]<sup>S21</sup>

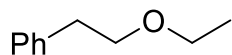

Isolated as a colorless oil after flash chromatography on silica gel using a (7/3) petroleum spirit and diethyl ether mixture ( $R_f = 0.6$ ), 47% yield.

$^1\text{H NMR (CDCl}_3\text{)}$ :  $\delta$  7.27 (m,  $5H_{\text{Ar}}$ ), 3.66 (t,  $J = 7.3$ , 2H), 3.52 (t,  $J = 7.0$ , 2H), 2.92 (t,  $J = 7.3$ , 2H), 1.23 (t,  $J = 7.0$ , 3H).  $^{13}\text{C}\{^1\text{H}\}$  NMR (CDCl<sub>3</sub>):  $\delta$  139.1 (C), 129.0 (2CH), 128.4 (2CH), 126.3 (CH), 71.7 (CH<sub>2</sub>), 66.4 (CH<sub>2</sub>), 36.5 (CH<sub>2</sub>), 15.3 (CH<sub>3</sub>).

### (1-ethoxypropan-2-yl)benzene 2b CAS [417705-20-5]<sup>S22</sup>

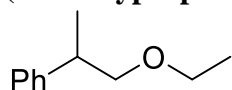

Isolated as a colorless oil after flash chromatography on silica gel using a (8/2) petroleum spirit and diethyl ether mixture ( $R_f = 0.7$ ), 93% yield.

$^1\text{H NMR (CDCl}_3\text{)}$ :  $\delta$  7.18 (m,  $5H_{\text{Ar}}$ ), 3.41 (m, 4H), 2.94 (m, 1H), 1.22 (d,  $J = 7.0$ , 3H), 1.10 (t,  $J = 7.0$ , 3H).  $^{13}\text{C}\{^1\text{H}\}$  NMR (CDCl<sub>3</sub>):  $\delta$  144.7 (C), 128.5 (2CH), 127.5 (2CH), 126.4 (CH), 76.7 (CH<sub>2</sub>), 66.4 (CH<sub>2</sub>), 40.2 (CH), 18.6 (CH<sub>3</sub>), 15.3 (CH<sub>3</sub>).

### (2-ethoxyethane-1,1-diyl)dibenzene 2d CAS [86171-63-3]<sup>S23</sup>

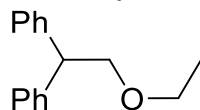

Isolated as a colorless oil after flash chromatography on silica gel using a (7/3) petroleum spirit and diethyl ether mixture ( $R_f = 0.5$ ), 63% yield.

$^1\text{H NMR (CDCl}_3\text{)}$ :  $\delta$  7.16 (m,  $10H_{\text{Ar}}$ ), 4.20 (t,  $J = 7.3$ , 1H), 3.87 (d,  $J = 7.3$ , 2H), 3.42 (q,  $J = 7.0$ , 2H), 1.07 (t,  $J = 7.0$ , 3H).  $^{13}\text{C}\{^1\text{H}\}$  NMR (CDCl<sub>3</sub>):  $\delta$  142.6 (2C), 128.5 (4CH), 125.5 (4CH), 126.5 (2CH), 73.91 (CH<sub>2</sub>), 66.6 (CH<sub>2</sub>), 51.2 (CH), 15.2 (CH<sub>3</sub>).

### 1-ethoxydodecane 2f CAS [7289-37-4]<sup>S24</sup>

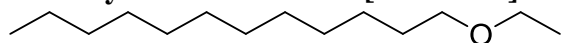

Isolated as a colorless oil after flash chromatography on silica gel using pure petroleum spirit ( $R_f = 0.3$ ), 88% yield.

$^1\text{H NMR (CDCl}_3\text{)}$ :  $\delta$  3.45 (q,  $J = 7.0$ , 2H), 3.38 (t,  $J = 7.0$ , 2H), 1.57 (m, 2H), 1.24 (brs, 18H), 1.18 (t,  $J = 7.0$ , 3H), 0.86 (t,  $J = 7.0$ , 3H).  $^{13}\text{C}\{^1\text{H}\}$  NMR (CDCl<sub>3</sub>):  $\delta$  70.8 (CH<sub>2</sub>), 66.0 (CH<sub>2</sub>), 31.9 (CH<sub>2</sub>), 29.8 (CH<sub>2</sub>), 29.6 (2CH<sub>2</sub>), 29.5 (2CH<sub>2</sub>), 29.3 (2CH<sub>2</sub>), 26.2 (CH<sub>2</sub>), 22.7 (CH<sub>2</sub>), 15.2 (CH<sub>3</sub>), 14.1 (CH<sub>3</sub>).



**dodecyloxybenzene 2g CAS [35021-68-2]<sup>S25</sup>**

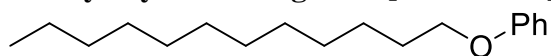

Isolated as a colorless oil after flash chromatography on silica gel using (9/1) petroleum spirit and diethyl ether mixture ( $R_f = 0.3$ ), 83% yield.

**$^1\text{H NMR}$  ( $\text{CDCl}_3$ ):**  $\delta$  7.19 (m,  $2\text{H}_{\text{Ar}}$ ), 6.83 (m,  $3\text{H}_{\text{Ar}}$ ), 3.88 (t,  $J = 6.6$ , 2H), 1.71 (q,  $J = 6.5$ , 2H), 1.36 (brs, 2H), 1.24 (brs, 16H), 0.81 (t,  $J = 7.0$ , 3H).  **$^{13}\text{C}\{^1\text{H}\}$  NMR ( $\text{CDCl}_3$ ):**  $\delta$  159.3 (C), 129.5 ( $2\text{CH}_{\text{Ar}}$ ), 120.6 ( $\text{CH}_{\text{Ar}}$ ), 114.7 ( $2\text{CH}_{\text{Ar}}$ ), 68.1 ( $\text{CH}_2$ ), 32.1 ( $\text{CH}_2$ ), 29.8 ( $\text{CH}_2$ ), 29.8 ( $\text{CH}_2$ ), 29.8 ( $\text{CH}_2$ ), 29.7 ( $\text{CH}_2$ ), 29.6 ( $\text{CH}_2$ ), 29.5 ( $\text{CH}_2$ ), 29.5 ( $\text{CH}_2$ ), 26.2 ( $\text{CH}_2$ ), 22.8 ( $\text{CH}_2$ ), 14.3 ( $\text{CH}_3$ ).

**((dodecyloxy)methyl)benzene 2h CAS [39695-18-6]<sup>S26</sup>**

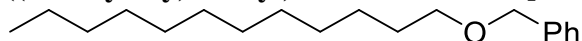

Isolated as a colorless oil after flash chromatography on silica gel using (8/2) petroleum spirit and diethyl ether mixture ( $R_f = 0.3$ ), 76% yield.

**$^1\text{H NMR}$  ( $\text{CDCl}_3$ ):**  $\delta$  7.32 (m,  $5\text{H}_{\text{Ar}}$ ), 4.70 (s, 2H), 3.64 (t,  $J = 6.6$ , 2H), 1.57 (m, 4H), 1.27 (brs, 16H), 0.88 (t,  $J = 6.7$ , 3H).  **$^{13}\text{C}\{^1\text{H}\}$  NMR ( $\text{CDCl}_3$ ):**  $\delta$  141.0 (C), 128.7 ( $2\text{CH}_{\text{Ar}}$ ), 127.8 ( $\text{CH}_{\text{Ar}}$ ), 127.1 ( $2\text{CH}_{\text{Ar}}$ ), 65.5 ( $\text{CH}_2$ ), 63.3 ( $\text{CH}_2$ ), 33.3 ( $\text{CH}_2$ ), 32.1 ( $\text{CH}_2$ ), 29.8 ( $\text{CH}_2$ ), 29.8 ( $\text{CH}_2$ ), 29.8 ( $\text{CH}_2$ ), 29.7 ( $\text{CH}_2$ ), 29.6 ( $\text{CH}_2$ ), 29.5 ( $\text{CH}_2$ ), 25.9 ( $\text{CH}_2$ ), 22.8 ( $\text{CH}_2$ ), 14.2 ( $\text{CH}_3$ ).

**1-(2-methoxyethyl)naphthalene 2i CAS [91909-27-2]<sup>S27</sup>**

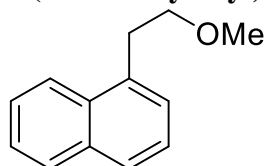

Isolated as a white solid after flash chromatography on silica gel using a (9/1) petroleum spirit and diethyl ether mixture ( $R_f = 0.4$ ), 94% yield.

**$^1\text{H NMR}$  ( $\text{CDCl}_3$ ):**  $\delta$  8.10 (d,  $J = 8.5$ ,  $1\text{H}_{\text{Ar}}$ ), 7.87 (dd,  $J = 7.6-1.8$ ,  $1\text{H}_{\text{Ar}}$ ), 7.75 (d,  $J = 8.2$ ,  $1\text{H}_{\text{Ar}}$ ), 7.51 (m,  $2\text{H}_{\text{Ar}}$ ), 7.40 (m,  $2\text{H}_{\text{Ar}}$ ), 3.76 (t,  $J = 7.4$ , 2H), 0.88 (t,  $J = 7.4$ , 2H and s, 3H).  **$^{13}\text{C}\{^1\text{H}\}$  NMR ( $\text{CDCl}_3$ ):**  $\delta$  134.8 (C), 133.9 (C), 132.1 (C), 128.8 (CH), 127.1 (CH), 126.8 (CH), 125.9 (CH), 125.6 (CH), 125.5 (CH), 123.7 (CH), 73.1 ( $\text{CH}_2$ ), 58.7 ( $\text{CH}_3$ ), 32.3 ( $\text{CH}_2$ ).

**(butoxymethyl)benzene 2j/2u CAS [588-67-0]<sup>S28</sup>**

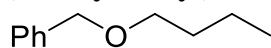

Isolated as a colorless oil after flash chromatography on silica gel using a (5/5) petroleum spirit and diethyl ether mixture ( $R_f = 0.7$ ), 73% yield.

$^1\text{H NMR (CDCl}_3\text{)}$ :  $\delta$  7.25 (m, 4H<sub>Ar</sub>), 7.17 (m, 1H), 4.41 (bs, 2H), 3.39 (t,  $J = 6.5$ , 2H), 1.52 (m, 2H), 1.33 (m, 2H), 0.84 (t,  $J = 7.3$ , 3H).  $^{13}\text{C}\{^1\text{H}\}$  NMR (CDCl<sub>3</sub>):  $\delta$  138.9 (C), 128.4 (CH<sub>Ar</sub>), 128.7 (2CH<sub>Ar</sub>), 127.5 (CH<sub>Ar</sub>), 73.0 (CH<sub>2</sub>), 70.3 (CH<sub>2</sub>), 32.0 (CH<sub>2</sub>), 19.5 (CH<sub>2</sub>), 14.0 (CH<sub>3</sub>).

**(oxybis(methylene))dibenzene 2k CAS [103-50-4]<sup>S29</sup>**

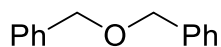

Isolated as a colorless oil after flash chromatography on silica gel using a (70/30) petroleum ether and triethylamine mixture ( $R_f = 0.5$ ), 78% yield.  $^1\text{H NMR (CDCl}_3\text{)}$ :  $\delta$  7.33 (m, 10H<sub>Ar</sub>), 4.57 (bs, 2CH<sub>2</sub>).  $^{13}\text{C}\{^1\text{H}\}$  NMR (CDCl<sub>3</sub>):  $\delta$  138.3 (2C), 128.4 (4CH<sub>Ar</sub>), 127.8 (4CH<sub>Ar</sub>), 127.6 (2CH<sub>Ar</sub>), 72.1 (2CH<sub>2</sub>).

**1,3-dihydroisobenzofuran 2n CAS [496-14-0]<sup>S30</sup>**

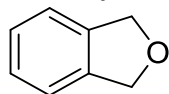

Isolated as a white solid after flash chromatography on silica gel using a (8/2) petroleum spirit and diethyl ether mixture ( $R_f = 0.3$ ), 51% yield.

$^1\text{H NMR (CDCl}_3\text{)}$ :  $\delta$  7.30 (m, 4H<sub>Ar</sub>), 5.17 (s, 4H).  $^{13}\text{C}\{^1\text{H}\}$  NMR (CDCl<sub>3</sub>):  $\delta$  139.2 (2C), 127.2 (2CH<sub>Ar</sub>), 121.0 (2CH<sub>Ar</sub>), 73.5 (2CH<sub>2</sub>).

**hexyl hexanoate 2q<sub>1</sub> CAS [6378-65-0]<sup>S31</sup>**

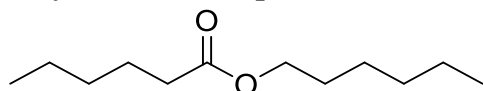

Isolated as a colorless oil after flash chromatography on silica gel using (8/2) petroleum spirit and diethyl ether mixture ( $R_f = 0.6$ ), 48% yield.

$^1\text{H NMR (CDCl}_3\text{)}$ :  $\delta$  3.99 (t,  $J = 6.7$ , 2H), 2.22 (t,  $J = 7.5$ , 2H), 1.55 (m, 4H), 1.24 (brs, 10H), 0.82 (brs, 6H).  $^{13}\text{C}\{^1\text{H}\}$  NMR (CDCl<sub>3</sub>):  $\delta$  174.0 (C), 64.4 (CH<sub>2</sub>), 34.4 (CH<sub>2</sub>), 31.4 (CH<sub>2</sub>), 31.3 (CH<sub>2</sub>), 28.6 (CH<sub>2</sub>), 25.6 (CH<sub>2</sub>), 24.7 (CH<sub>2</sub>), 22.5 (CH<sub>2</sub>), 22.3 (CH<sub>2</sub>), 14.0 (CH<sub>3</sub>), 13.9 (CH<sub>3</sub>).

**Dihexyl ether 2q<sub>2</sub> CAS [112-58-3]<sup>S32</sup>**

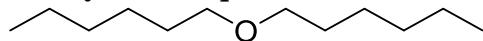

Isolated as a colorless oil after flash chromatography on silica gel using (8/2) petroleum spirit and diethyl ether mixture ( $R_f = 0.8$ ), 51% yield.

$^1\text{H NMR (CDCl}_3\text{)}$ :  $\delta$  3.32 (t,  $J = 6.7$ , 4H), 1.49 (m, 4H), 1.27 (brs, 12H), 0.83 (brs, 6H).  $^{13}\text{C}\{^1\text{H}\}$  NMR (CDCl<sub>3</sub>):  $\delta$  71.1 (2CH<sub>2</sub>), 31.9 (2CH<sub>2</sub>), 29.9 (2CH<sub>2</sub>), 26.0 (2CH<sub>2</sub>), 22.8 (2CH<sub>2</sub>), 14.2 (2CH<sub>3</sub>).

**(3-ethoxypropyl)benzene 2t/2v CAS [5848-56-6]<sup>S21</sup>**

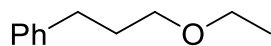

Isolated as a colorless oil after flash chromatography on silica gel using a (99/1) petroleum ether and triethylamine mixture ( $R_f = 0.4$ ), 89% yield.

**<sup>1</sup>H NMR (CDCl<sub>3</sub>):**  $\delta$  7.27 (m, 2H<sub>Ar</sub>), 7.19 (m, 3H<sub>Ar</sub>), 3.46 (q,  $J = 7.0$ , 2H), 3.44 (t,  $J = 6.5$ , 2H), 2.71 (t,  $J = 7.7$ , 2H), 1.91 (m, 2H), 1.22 (t,  $J = 7.1$ , 3H). **<sup>13</sup>C{<sup>1</sup>H} NMR (CDCl<sub>3</sub>):**  $\delta$  142.2 (C), 128.6 (2CH<sub>Ar</sub>), 128.4 (2CH<sub>Ar</sub>), 125.9 (CH<sub>Ar</sub>), 69.9 (CH<sub>2</sub>), 66.2 (CH<sub>2</sub>), 32.5 (CH<sub>2</sub>), 31.5 (CH<sub>2</sub>), 15.4 (CH<sub>3</sub>).

**(E)-(4-ethoxybut-1-en-1-yl)benzene 2w CAS [114068-10-9]<sup>S33</sup>**

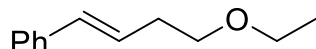

Isolated as a colorless oil after flash chromatography on silica gel using a (7/3) petroleum spirit and diethyl ether mixture ( $R_f = 0.6$ ), 71% yield.

**<sup>1</sup>H NMR (CDCl<sub>3</sub>):**  $\delta$  7.29 (m, 5H<sub>Ar</sub>), 6.46 (d,  $J = 15.9$ , 1H), 6.25 (dt,  $J = 15.9$ ,  $J = 6.9$ , 1H), 3.53 (m, 4H), 2.50 (qd,  $J = 6.9$ ,  $J = 1.4$ , 2H), 1.22 (t,  $J = 7$ , 3H). **<sup>13</sup>C{<sup>1</sup>H} NMR (CDCl<sub>3</sub>):**  $\delta$  137.7 (C), 131.6 (CH), 128.6 (2CH<sub>Ar</sub>), 127.2 (CH), 127.1 (CH), 126.2 (2CH<sub>Ar</sub>), 70.3 (CH<sub>2</sub>), 66.4 (CH<sub>2</sub>), 33.7 (CH<sub>2</sub>), 15.35 (CH<sub>3</sub>).

**(Z)-1-methoxyoctadec-9-ene 2x CAS [57205-42-2]<sup>S33</sup>**

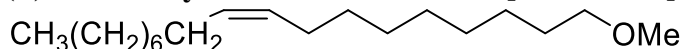

Isolated as a colorless oil after flash chromatography on silica gel using a (7/3) dichloromethane and diethyl ether mixture ( $R_f = 0.6$ ), 88% yield.

**<sup>1</sup>H NMR (CDCl<sub>3</sub>):**  $\delta$  5.30 (m, 2H), 3.29 (t,  $J = 6.7$ , 2H), 3.25 (s, 3H), 1.88 (m, 4H), 1.48 (m, 2H), 1.22 (m, 22H), 0.81 (t,  $J = 6.8$ , 3H). **<sup>13</sup>C{<sup>1</sup>H} NMR (CDCl<sub>3</sub>):**  $\delta$  130.5 (CH), 130.1 (CH), 73.1 (CH<sub>2</sub>), 58.7 (OCH<sub>3</sub>), 32.7 (CH<sub>2</sub>), 32.1 (CH<sub>2</sub>), 29.9 (CH<sub>2</sub>), 29.8 (CH<sub>2</sub>), 29.7 (CH<sub>2</sub>), 29.7 (CH<sub>2</sub>), 29.6 (CH<sub>2</sub>), 29.5 (CH<sub>2</sub>), 29.3 (CH<sub>2</sub>), 29.3 (CH<sub>2</sub>), 29.2 (CH<sub>2</sub>), 27.4 (CH<sub>2</sub>), 26.3 (CH<sub>2</sub>), 22.8 (CH<sub>2</sub>), 14.2 (CH<sub>3</sub>).

**(6Z,9Z)-18-methoxyoctadeca-6,9-diene 2y CAS [23405-45-0]<sup>S34</sup>**

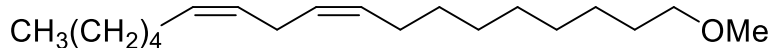

Isolated as a colorless oil after flash chromatography on silica gel using a (7/3) dichloromethane and diethyl ether mixture ( $R_f = 0.5$ ), 68% yield.

**<sup>1</sup>H NMR (CDCl<sub>3</sub>):**  $\delta$  5.36 (m, 4H), 3.36 (t,  $J = 6.7$ , 2H), 3.33 (s; 3H), 2.77 (t,  $J = 6.0$ , 2H), 2.06 (m, 4H), 1.55 (m, 2H), 1.34 (m, 16H), 0.89 (t,  $J = 6.8$ , 3H). **<sup>13</sup>C{<sup>1</sup>H} NMR (CDCl<sub>3</sub>):**  $\delta$  130.4 (CH), 130.3 (CH), 128.2 (CH), 128.1 (CH), 73.1 (CH<sub>2</sub>), 58.7 (OCH<sub>3</sub>), 31.7 (CH<sub>2</sub>), 29.8 (2CH<sub>2</sub>), 29.6 (2CH<sub>2</sub>), 29.5 (CH<sub>2</sub>), 29.4 (CH<sub>2</sub>), 27.4 (2CH<sub>2</sub>), 26.3 (CH<sub>2</sub>), 25.8 (CH<sub>2</sub>), 22.7 (CH<sub>2</sub>), 14.2 (CH<sub>3</sub>).

## VI) References.

- S1) a) W. E. Buschmann, J. S. Miller, *Inorganic Syntheses*, 2002, **33**, 83; b) N. A. Yakelis, R. G. Bergman, *Organometallics*, 2005, **24**, 3579; c) M. Brookhart, B. Grant, A. F. Volpe, *Organometallics*, 1992, **11**, 3920.
- S2) TURBOMOLE V7.1 2016, a development of University of Karlsruhe and Forschungszentrum Karlsruhe GmbH, 1989-2007, TURBOMOLE GmbH, since 2007; available from <http://www.turbomole.com>.
- S3) J. P. Perdew, K. Burke, M. Ernzerhof, *Phys. Rev. Lett.*, 1996, **77**, 3865.
- S4) S. Ansgar, H. Christian, A. Reinhart, *J. Chem. Phys.*, 1994, **100**, 5829.
- S5) K. Eichkorn, O. Treutler, H. Öhm, M. Häser, R. Ahlrichs, *Chem. Phys. Lett.*, 1995, **240**, 283.
- S6) M. Sierka, A. Hoge Kamp, R. Ahlrichs, *J. Chem. Phys.*, 2003, **118**, 9136.
- S7) A. Klamt, G. Schüürmann, *J. Chem. Soc., Perkin Trans. 2*, 1993, 799.
- S8) K. Fukui, *Acc. Chem. Res.*, 1981, **14**, 363.
- S9) M. Mammen, E. I. Shakhnovich, J. M. Deutch, G. M. Whitesides, *J. Org. Chem.*, 1998, **63**, 3821.
- S10) S. Kozuch, J. M. L. Martin, *ACS Catal.*, 2011, **1**, 246.
- S11) A. Uhe, S. Kozuch, S. Shaik, *Comput. Chem.*, 2011, **32**, 978.
- S12) E. R. Johnson; S. Keinan; P. Mori-Sanchez; J. Contreras- García; A. J. Cohen; W. Yang. *J. Am. Chem. Soc.*, 2010, **132**, 6498.
- S13) J. Contreras-García, E. R. Johnson, S. Keinan, R. Chaudret, J.-P. Piquemal; D. N. Beratan; W. R. Yang. *J. Chem. Theory Comput.*, 2011, **7**, 625.
- S14) a) T. Popek, T. Lis, *Carbohydr. Res.*, 2002, **337**, 787; b) L. B. Jerzykiewicz, T. Lis, E. Zuziak, *Carbohydr. Res.*, 2005, **340**, 2422.
- S15) a) S.-Y. Kim, A. Saxena, G. Kwak, M. Fujiki, Y. Kawakami, *Chem. Commun.* **2004**, 538; b) A. Saxena, R. Rai, S.-Y. Kim, M. Fujiki, M. Naito, K. Okoshi, G. Kwak, *J. Polymer Sci.: Part A: Polymer Chem.*, 2006, **44**, 5060; c) T. Kawabe, M. Naito, M. Fujiki, *Polymer J.*, 2008, **40**, 317.
- S16) Oxidative addition: a) A. J. Chalk, J. F. Harrod, *J. Am. Chem. Soc.*, 1965, **87**, 16; b) I. Ojima, M. Nihonyanagi, T. Kogure, M. Komagai, S. Horiuchi, K. Nakatsugawa, Y. Nagai, *J. Organomet. Chem.*, 1975, **94**, 449; c) P. B. Glaser, T. Don Tilley, *J. Am. Chem. Soc.*, 2003, **125**, 13640; d) T. J. Steiman, C. Uyeda, *J. Am. Chem. Soc.*, 2015, **137**, 6104; double activation metal-substrate: e) J. Yang, P. S. White, M. Brookhart, *J. Am. Chem. Soc.*, 2008, **130**, 17509; f) T. T. Metsänen, P. Hrobárik, H. F. T. Klare, M. Kaupp, M. Oestreich, *J. Am. Chem. Soc.*, 2014, **136**, 6912; cooperation metal-ligand: e) K. A. Nolin, J. R. Krumper, M. D. Pluth, R. G. Bergman, F. D. Toste, *J. Am. Chem. Soc.*, 2007, **129**, 14684; f) M. A. Rankin, G. Schatte, R. McDonald, M. Stradiotto, *J. Am. Chem. Soc.*, 2007, **129**, 6390; g) M. A. Rankin, D. F. MacLean, R. McDonald, M. J. Ferguson, M. D. Lumsden, M. Stradiotto, *Organometallics*, 2009, **28**, 74; heterolytic polar electrophilic activation: g) M. Hamdaoui, C. Desrousseaux, H. Habbita, J.-P. Djukic, *Organometallics*, 2017, **36**, 4864; h) P. W. Smith. T. Don Tilley, *J. Am. Chem. Soc.*, 2018, **140**, 3880.
- S17) a) D. W. Stephan and G. Erker, *Angew. Chem. Int. Ed.*, 2015, **54**, 6400; b) M. Oestreich, J. Hermeke and J. Mohr, *Chem. Soc. Rev.*, 2015, **44**, 2202; c) D. W. Stephan, *Science*, 2016, **354**, 1236; d) Q. Shi, Z. Chen and J. Hu, *Current Org. Chem.*, 2018, **22**, 557; e) W. Meng, X. Feng and H. Du, *Acc. Chem. Res.*, 2018, **51**, 191; f) J. Lam, K. M. Szkop, E. Mosaféri and D. W. Stephan, *Chem. Soc. Rev.*, 2019, **48**, 3592.

S18) a) D. J. Parks, W. E. Piers, *J. Am. Chem. Soc.*, 1996, **118**, 9440; b) D. J. Parks, J. M. Blackwell, W. E. Piers, *J. Org. Chem.*, 2000, **65**, 3090; c) A. Berkefeld, W. E. Piers, M. Parvez, *J. Am. Chem. Soc.*, 2010, **132**, 10660; d) M. Mewald, R. Fröhlich, M. Oestreich, *Chem. Eur. J.*, 2011, **17**, 9406; e) A. J. V. Marwitz, L. G. Mercier, *Inorg. Chem.*, 2011, **50**, 12252; f) W. Nie, H. F. T. Klare, M. Oestreich, R. Fröhlich, G. Kehr, G. Erker, *Z. Naturforsch. B*, 2012, **67**, 987; g) D. Chen, V. Leich, F. Pan, J. Klankermayer, *Chem. Eur. J.*, 2012, **18**, 5184; h) L. Greb, P. Oña-Burgos, A. Kubas, F. C. Falk, F. Breher, K. Fink, J. Paradies, *Dalton Trans*, 2012, **41**, 9056.

S19) Examples of chemical reactions showing a barrier of ~ 43.0 kcal/mol or even higher for a reaction occurring at a temperature of 100°C: a) J. Florian, A. Warshel, *J. Phys. Chem. B*, 1998, **102**, 719; b) M. Yamakawa, H. Ito, R. Noyori, *J. Am. Chem. Soc.*, 2000, **122**, 1466; c) T. M. Nguyen, V. S. Nguyen, H. M. Matus, G. Gopakumar, D. A. Dixon, *J. Phys. Chem. A*, 2007, **111**, 679; d) T. B. Lee, M. L. McKee, *Inorg. Chem.*, 2009, **48**, 7564; e) L.-J. Song, T. Wang, X. Zhang, L. W. Chung, D. Y. Wu, *ACS Catal.*, 2017, **7**, 1361.

S20) a) M. Mammen, E. I. Shakhnovich, J. M. Deutch, G. M. Whitesides, *J. Org. Chem.*, 1998, **63**, 3821; b) S. Kozuch, J. M. L. Martin, *ACS Catal.*, 2011, **1**, 246; c) A. Uhe, S. Kozuch, S. Shaik, *Comput. Chem.*, 2011, **32**, 978.

S21) N. Sakai, T. Moriya, T. Konakahara, *J. Org. Chem.*, 2007, **72**, 5920.

S22) a) D. R. Hou, J. Reibenspies, T. J. Colacot, K. Burgess, *Chem. Eur. J.*, 2001, **7**, 5391; b) P. H. Mazzocchi, D. Shook, L. Liu, *Heterocycles*, 1987, **26**, 1165.

S23) a) M. Weiser, S. Hermann, A. Penner, H. A. Wagenknecht, *Beilstein J. Org. Chem.*, 2015, **11**, 568; b) R. Leardini, A. Tundo, G. Zanardi, G. F. Pedulli, *J. Chem. Soc., Perkin Trans. 2*, 1983, 285.

S24) a) K. Matsubara, T. Iura, T. Maki, H. Nagashima, *J. Org. Chem.*, 2002, **67**, 4985; b) S. Uemura, S. Fukuzawa, *J. Chem. Soc., Perkin Trans. 1*, 1985, 471.

S25) K. Swapna, S. N. Murthy, M. T. Jyothi, Y. V. D. Nageswar, *Org. Biomol. Chem.*, 2011, **9**, 5978.

S26) a) N. Yasukawa, T. Kanie, M. Kuwata, Y. Monguchi, H. Sajiki, Y. Sawama, *Chem. Eur. J.*, 2017, **23**, 10974; b) A. Prades, R. Corberan, M. Poyatos, E. Peris, *Chem. Eur. J.*, 2008, **14**, 11474.

S27) N. Hoffman, J.-P. Pete, *J. Org. Chem.*, 2002, **67**, 2315.

S28) J. Alvarez-Builla, J. J. Vaquero, J. L. Garcia Navio, J. F. Cabello, C. Sunkel, M. Fau de Casa-Juana, F. Dorrego, L. Santos, *Tetrahedron*, 1990, **46**, 967.

S29) G. A. Molander, B. Canturk, *Org. Lett.*, 2008, **10**, 2135.

S30) M. Yasuda, M. Haga, A. Baba, *Organometallics*, 2009, **28**, 1998.

S31) N. Yamamoto, Y. Obora, Y. Ishii, *J. Org. Chem.*, 2011, **76**, 2937.

S32) T. Fujisaka, M. Nojima, S. Kusabayashi, *J. Org. Chem.*, 1985, **50**, 275.

S33) S. Xu, J. S. Boschen, A. Biswas, T. Kobayashi, M. Pruski, T. L. Windus, A. D. Sadow, *Dalton Trans.*, 2015, **44**, 15897.

S34) Y. Corre, V. Rysak, X. Trivelli, F. Agbossou-Niedercorn, C. Michon, *Eur. J. Org. Chem.*, 2017, **2017**, 4820.

## VII) $^1\text{H}$ , $^{13}\text{C}\{^1\text{H}\}$ NMR spectra of isolated compounds

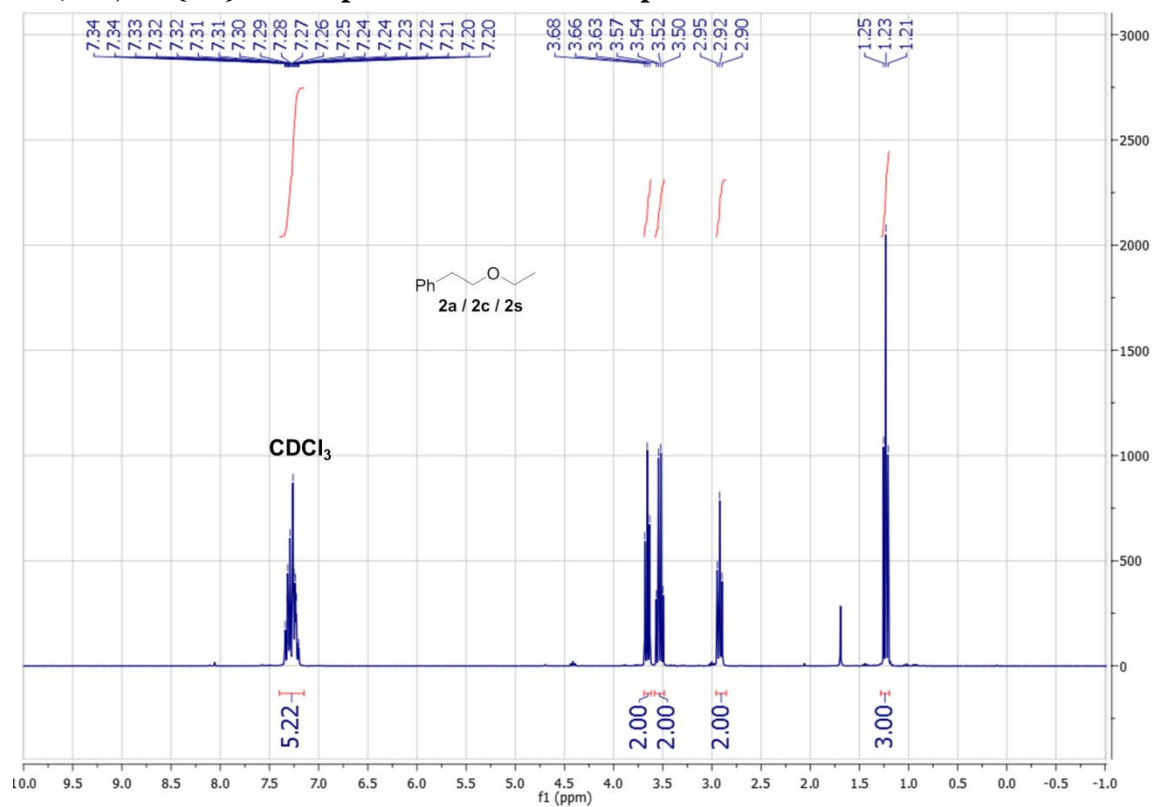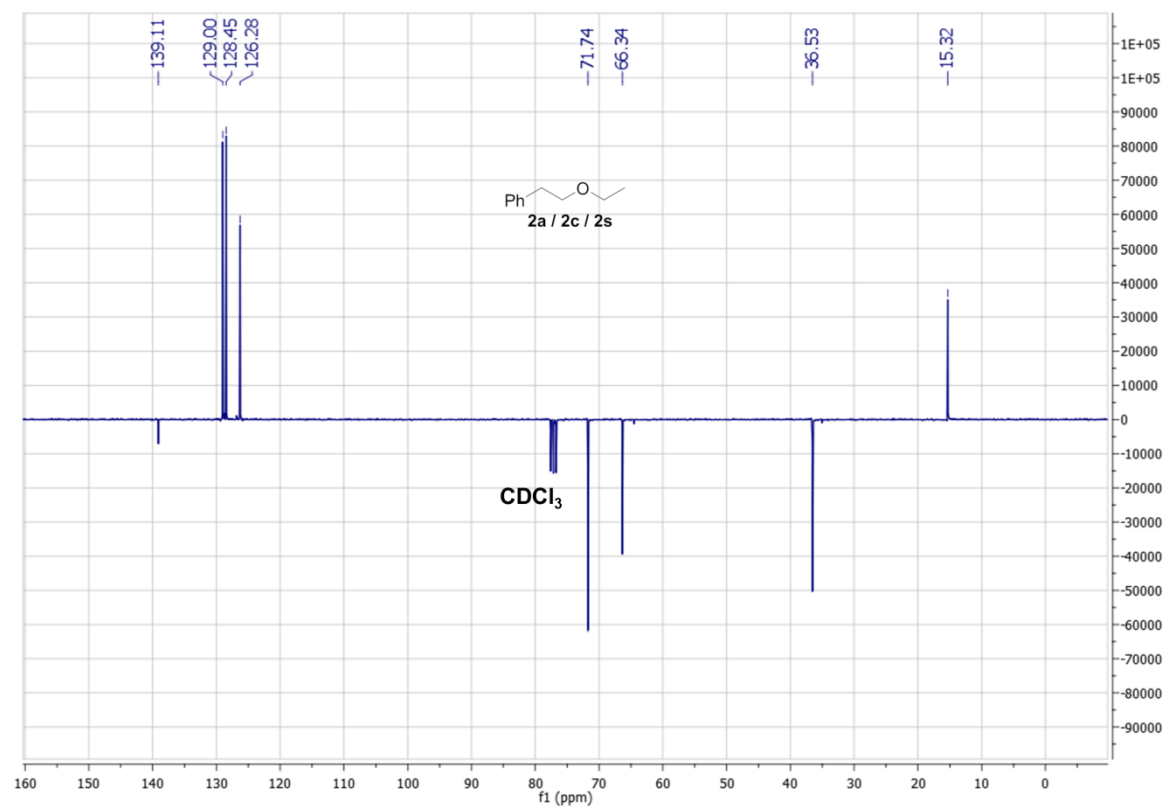

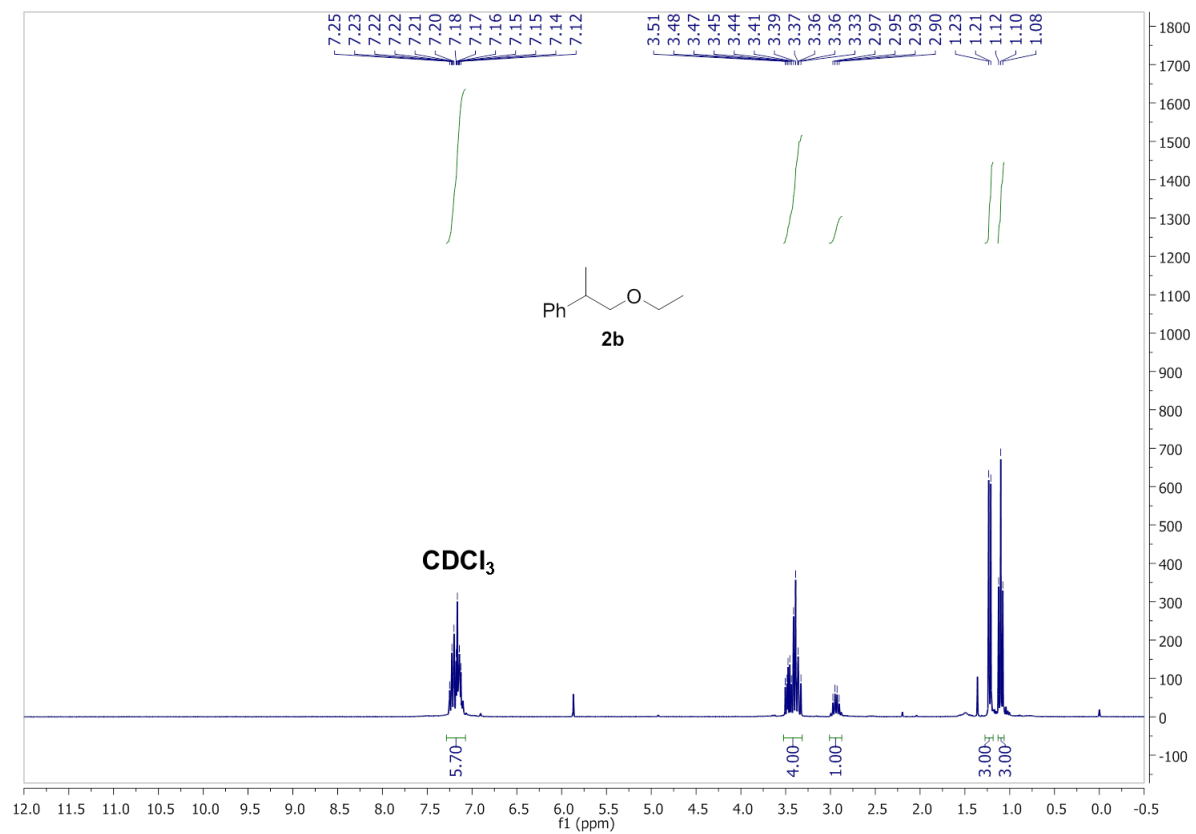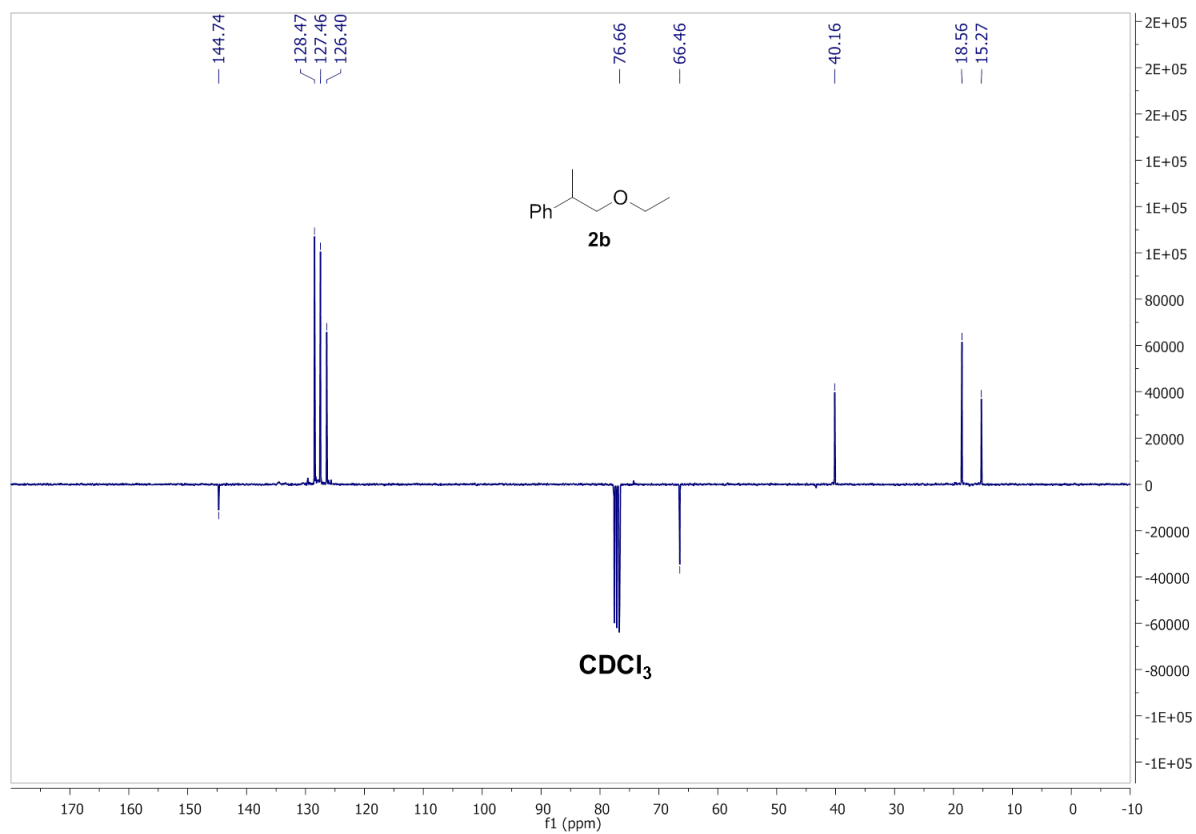

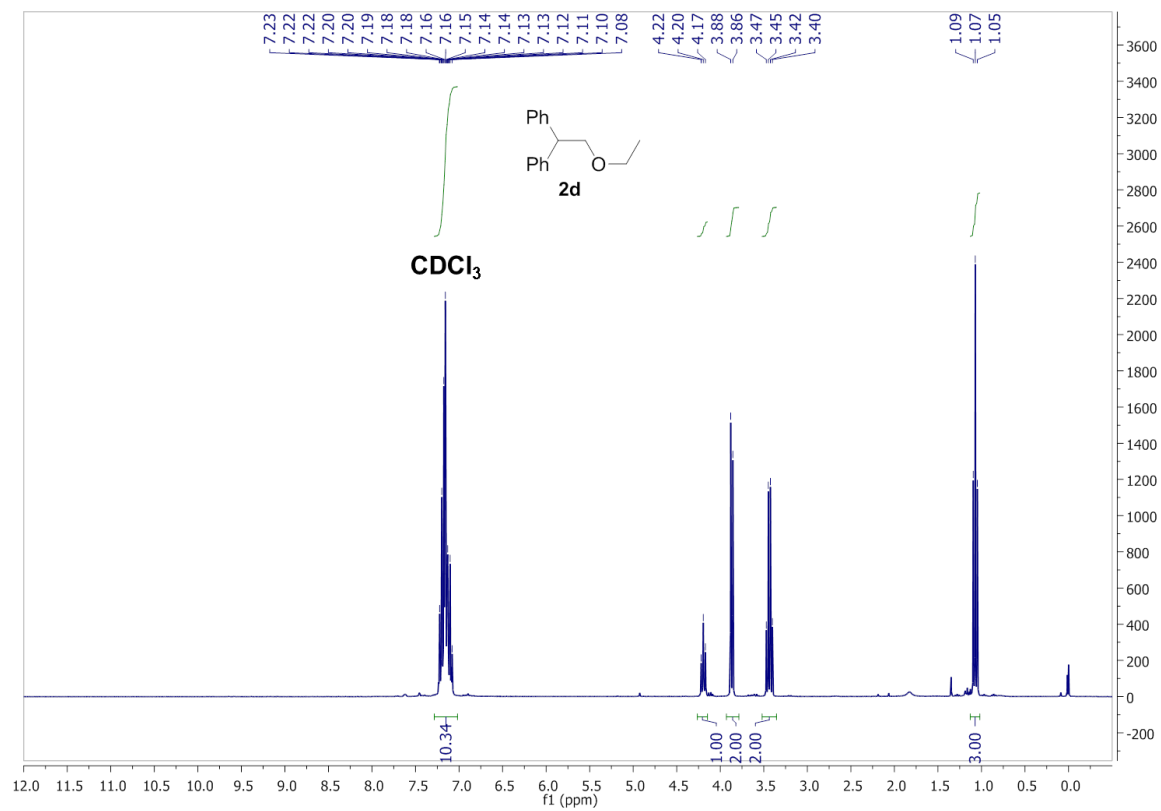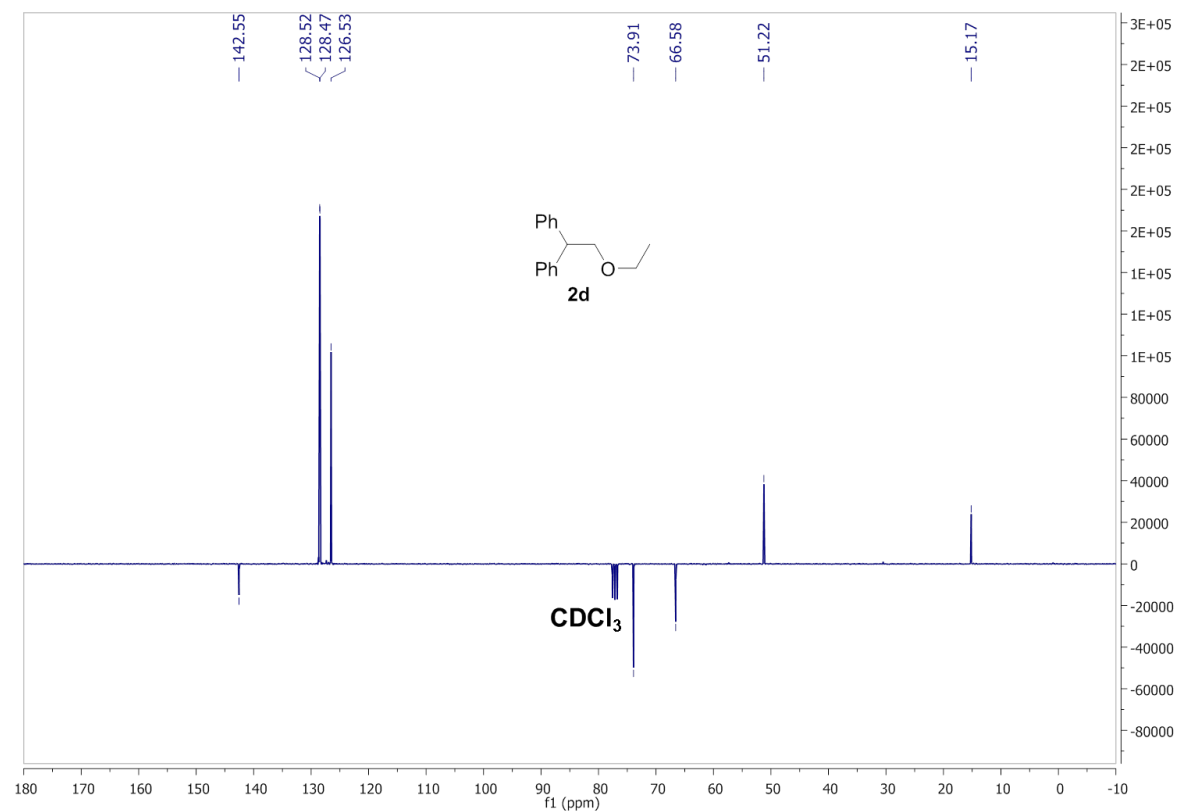



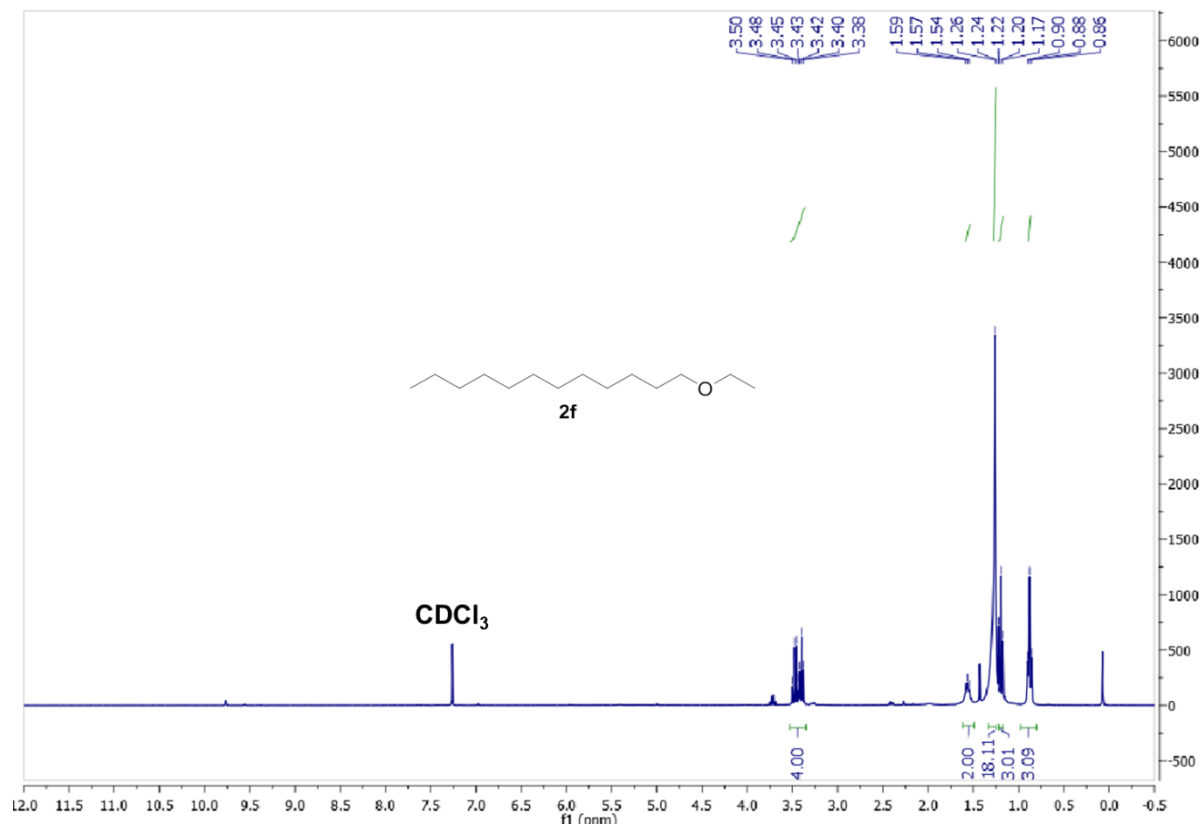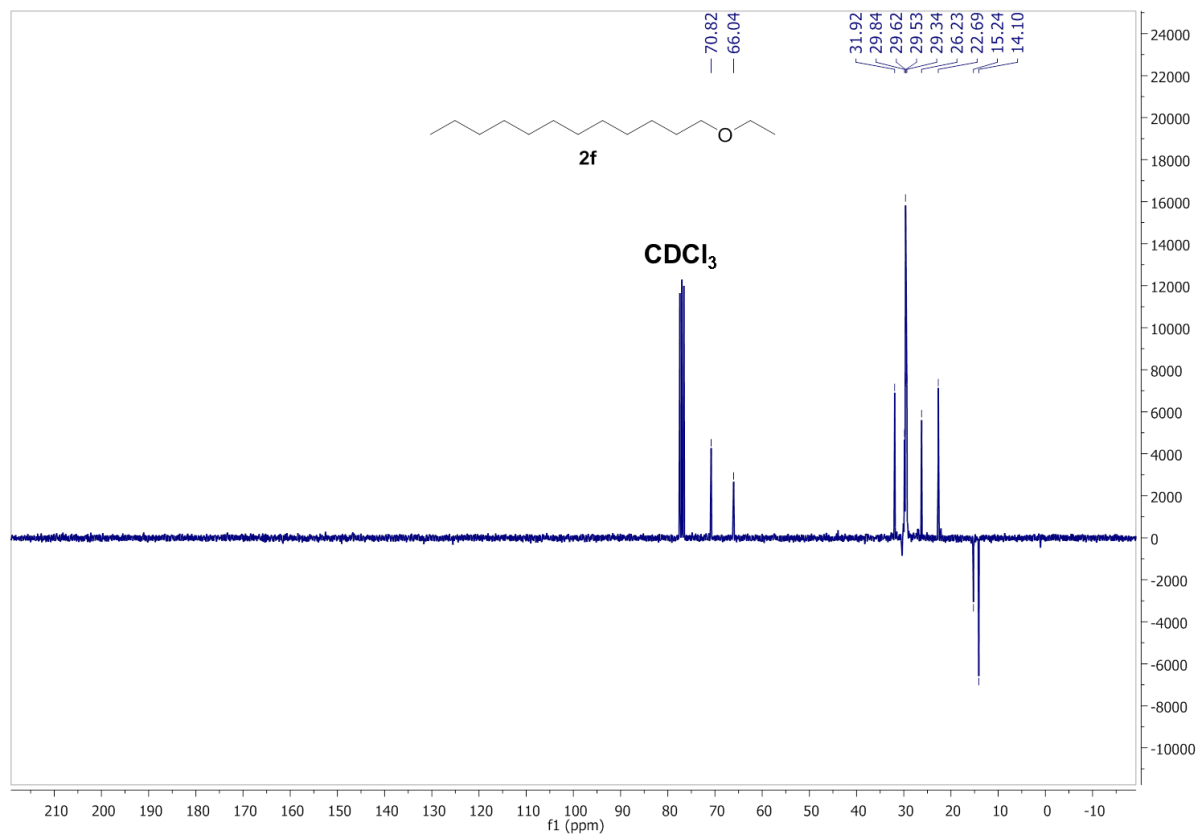

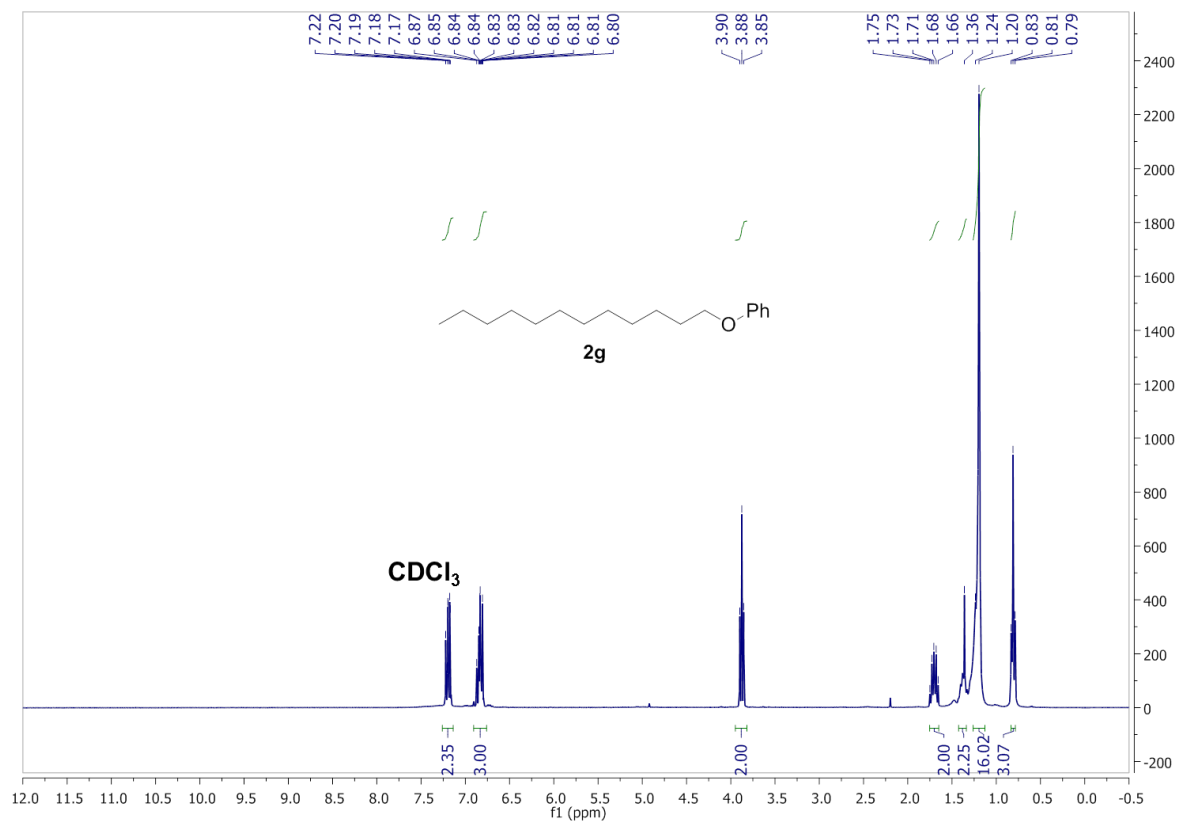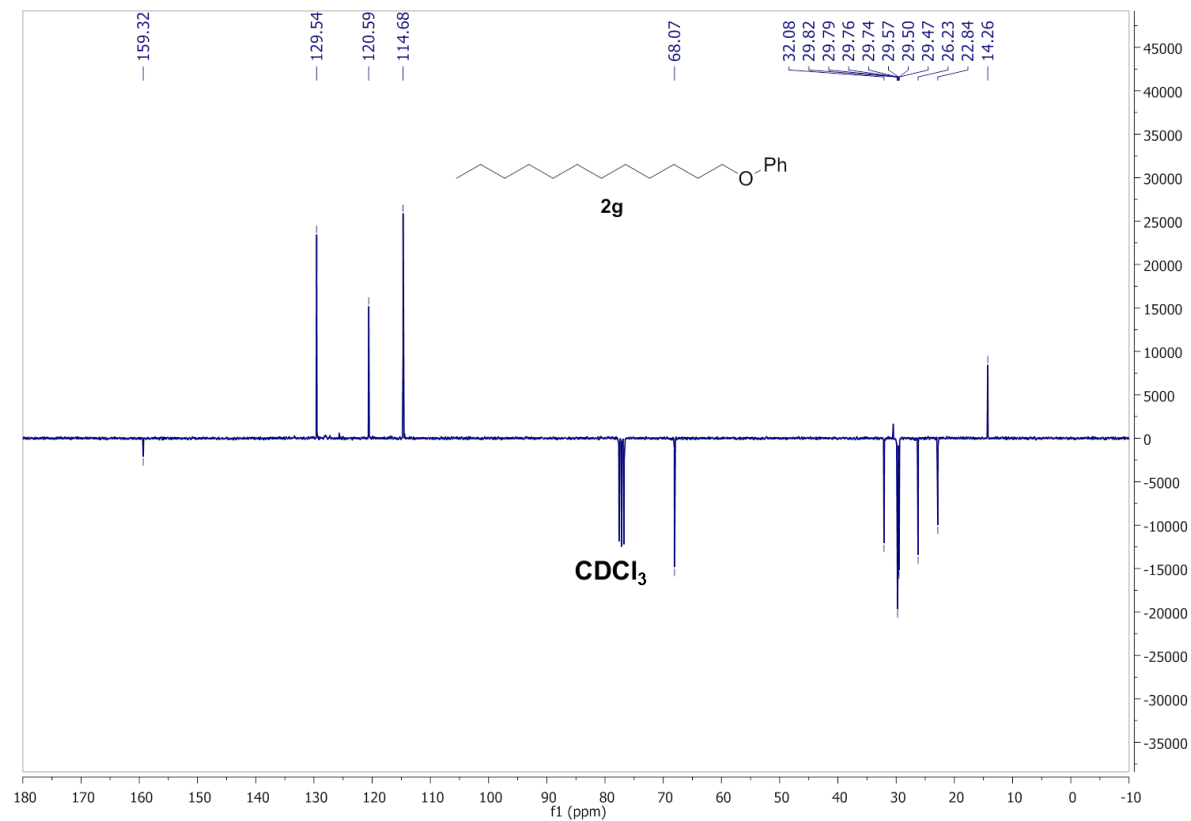

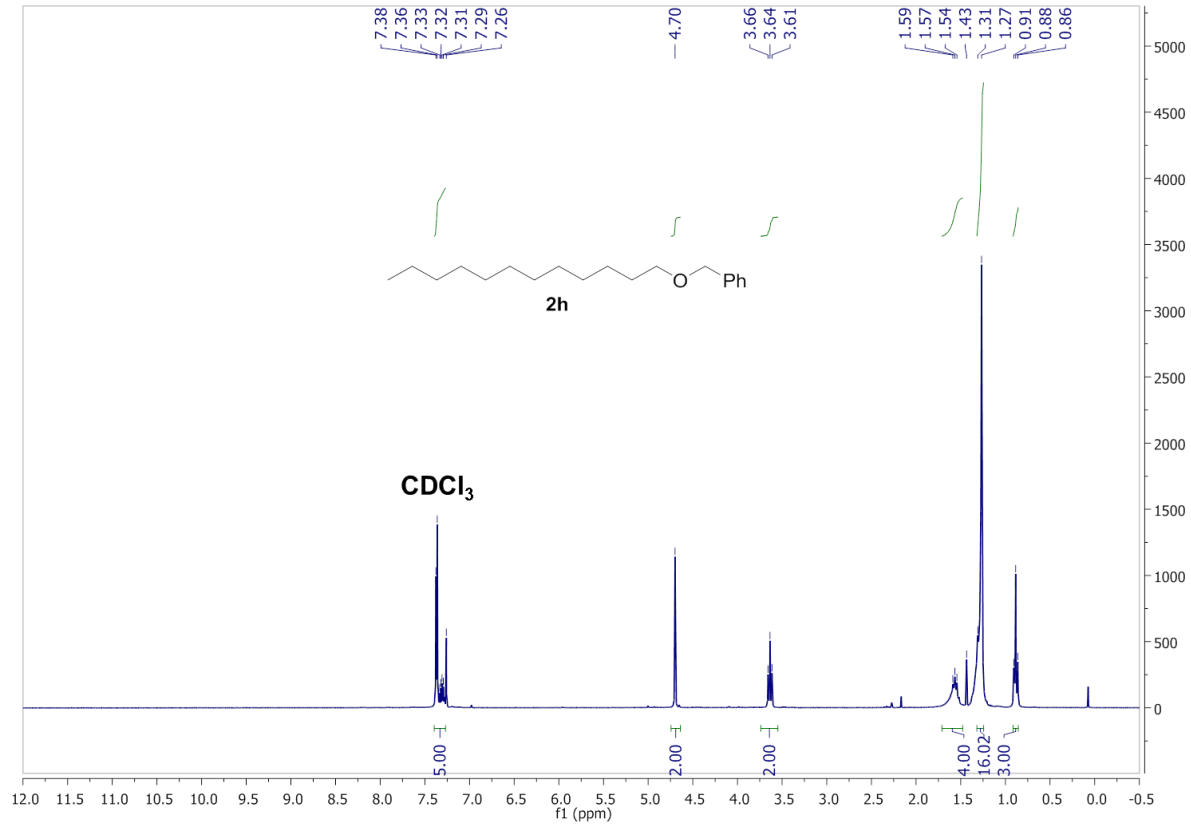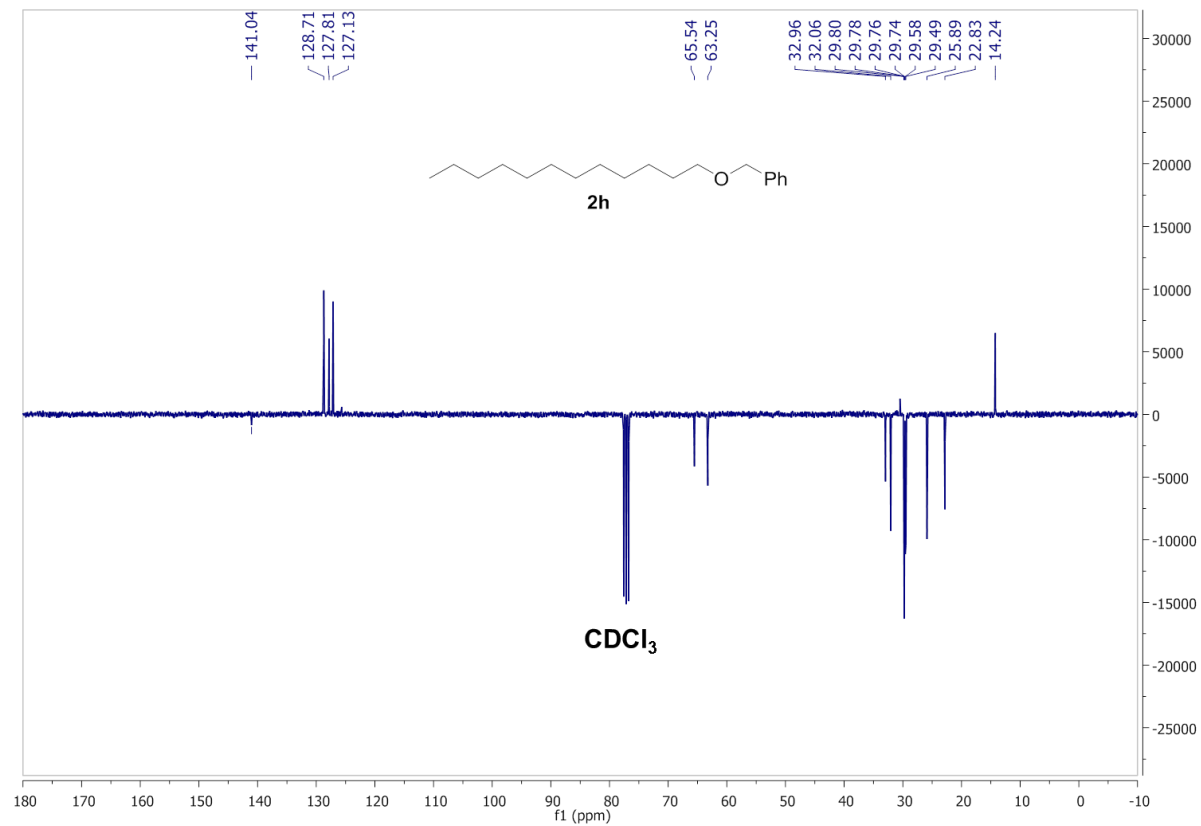

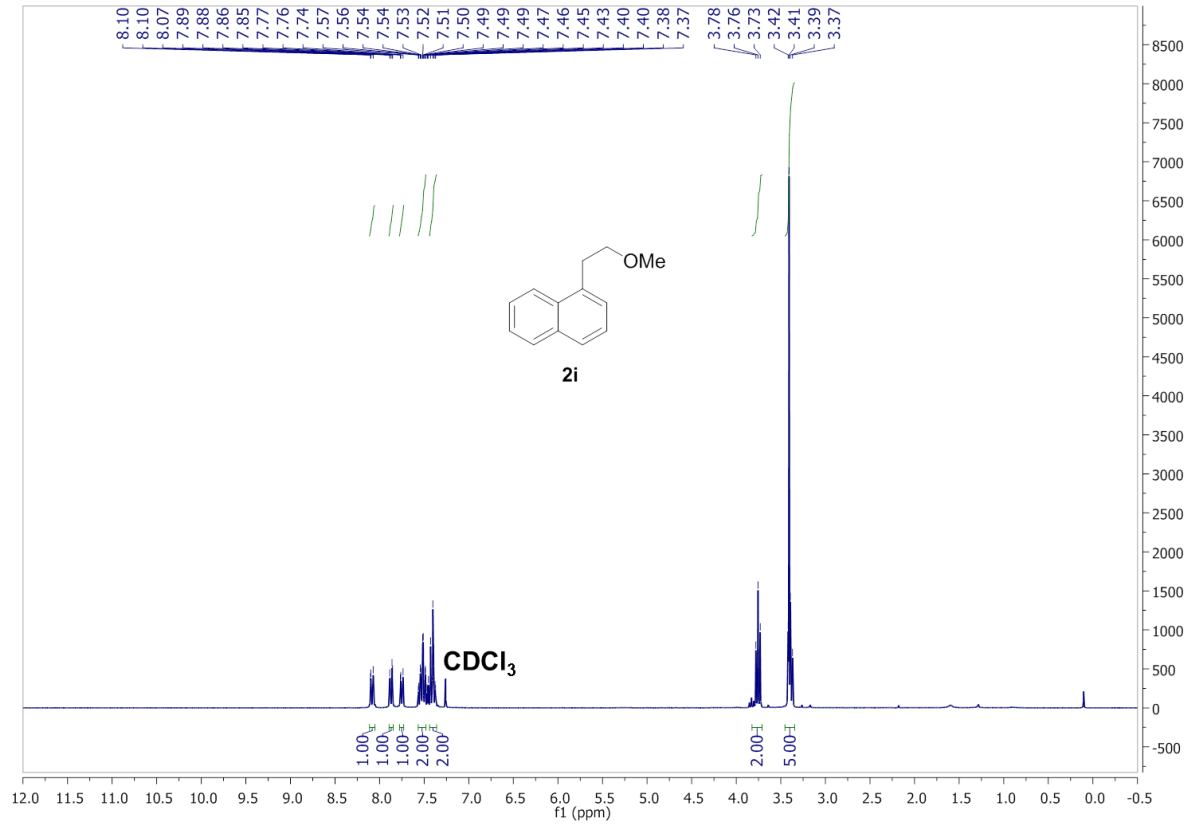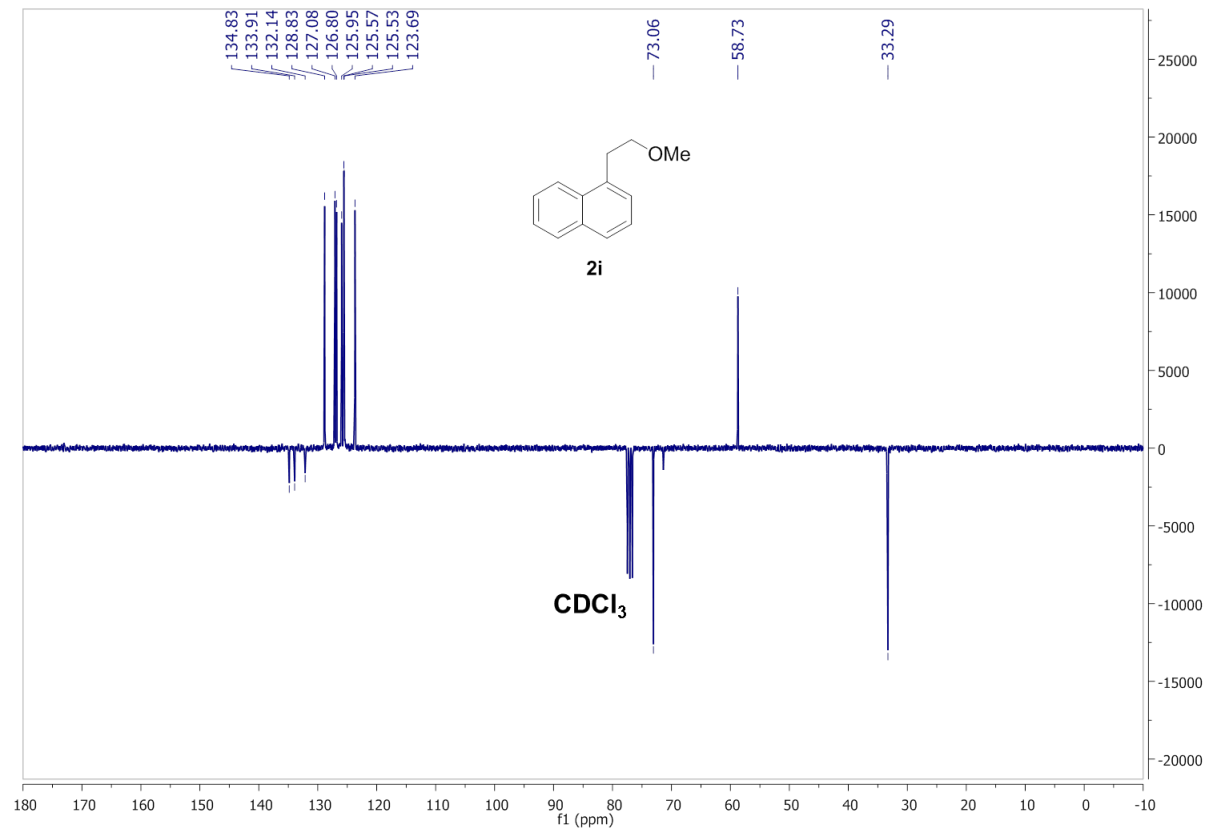

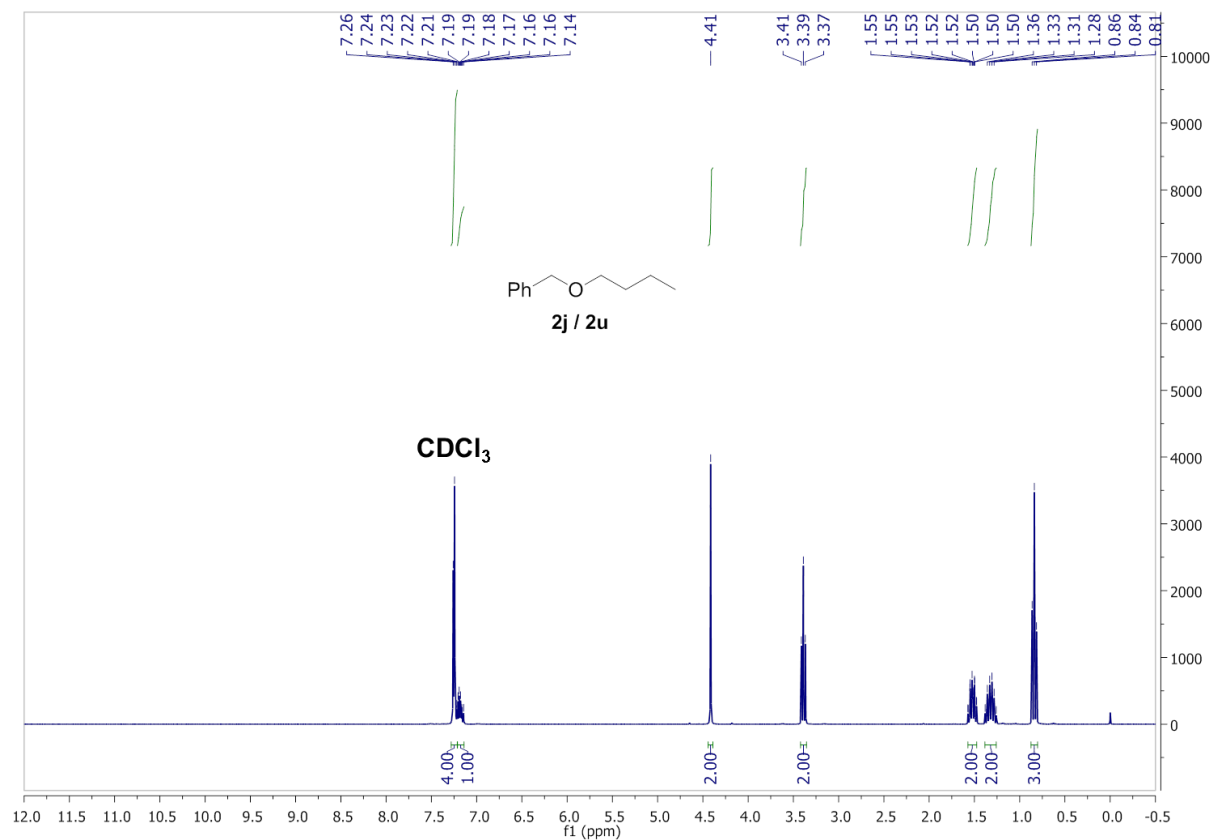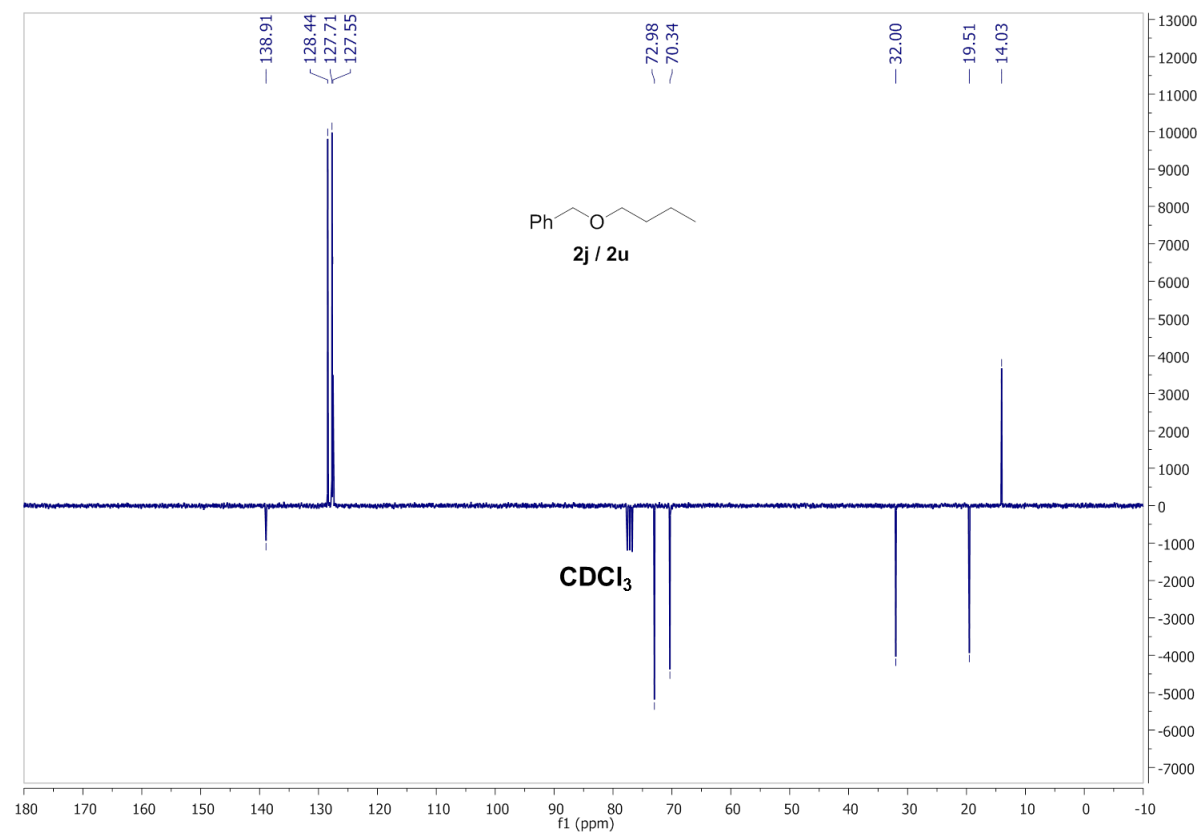

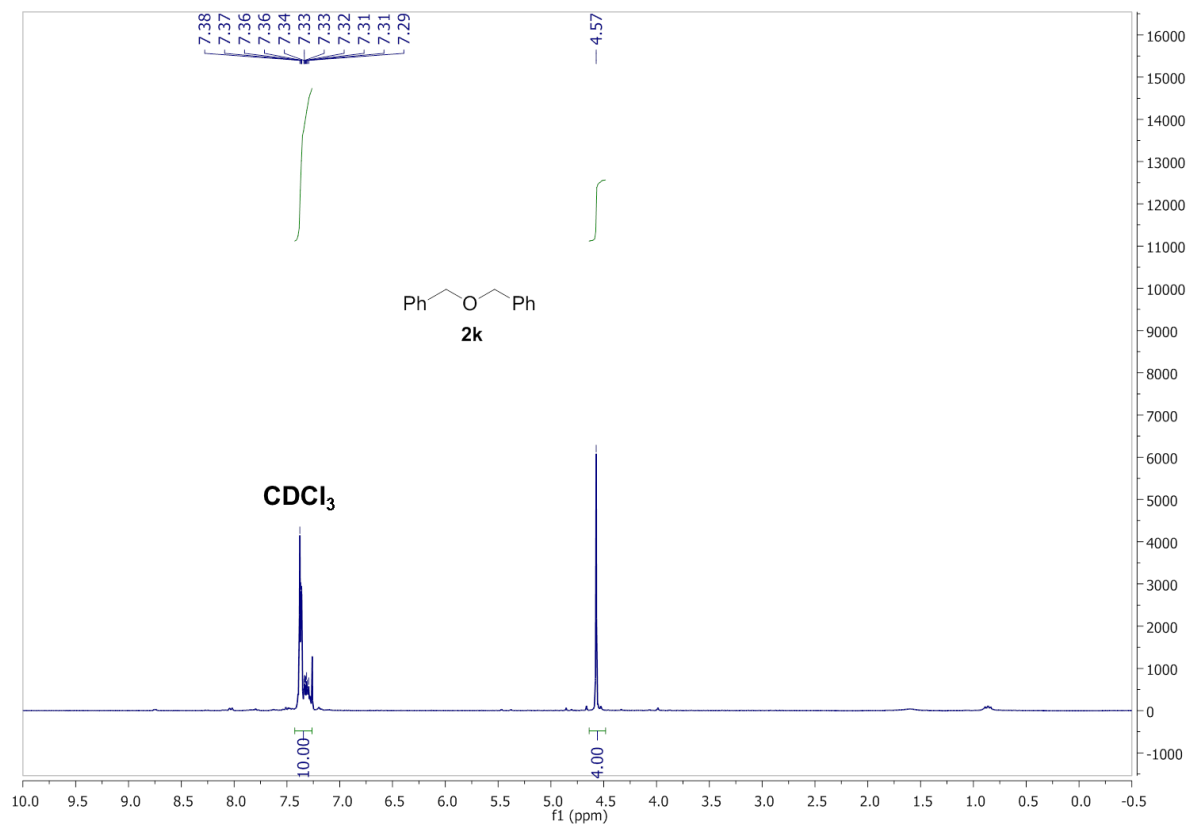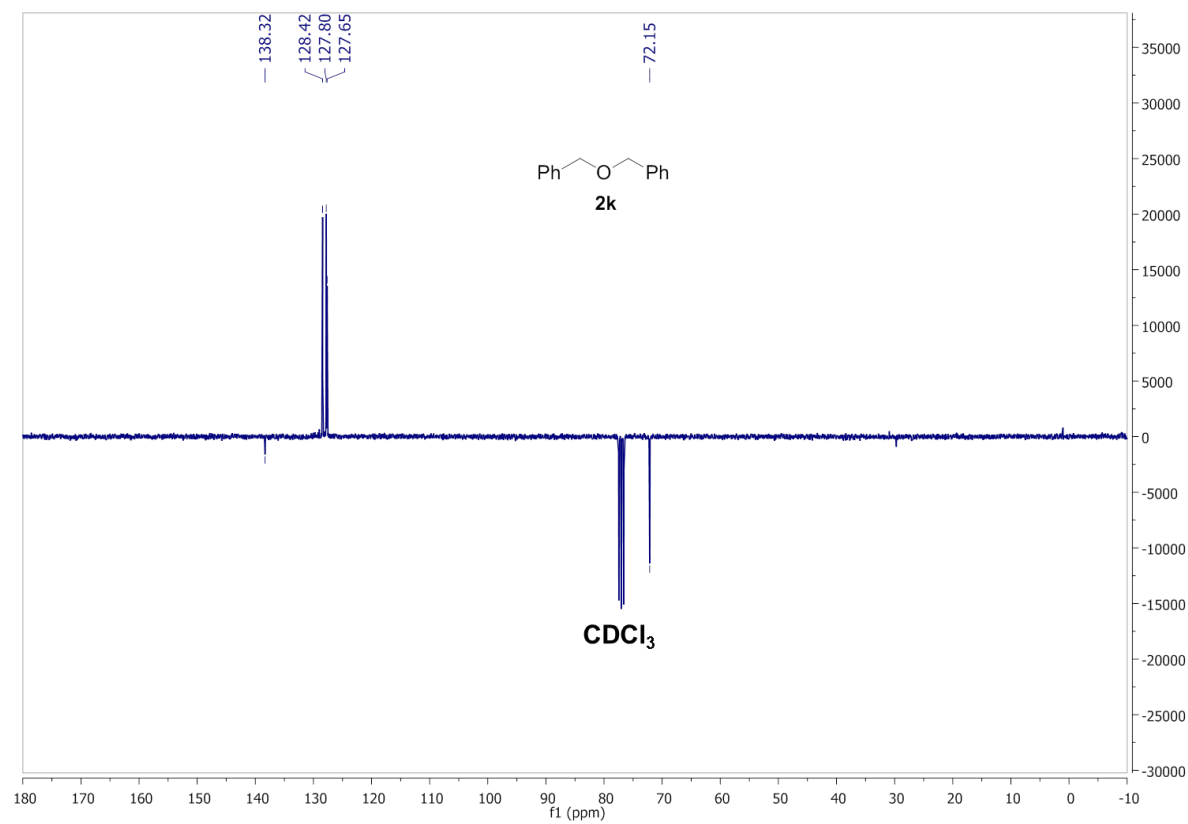

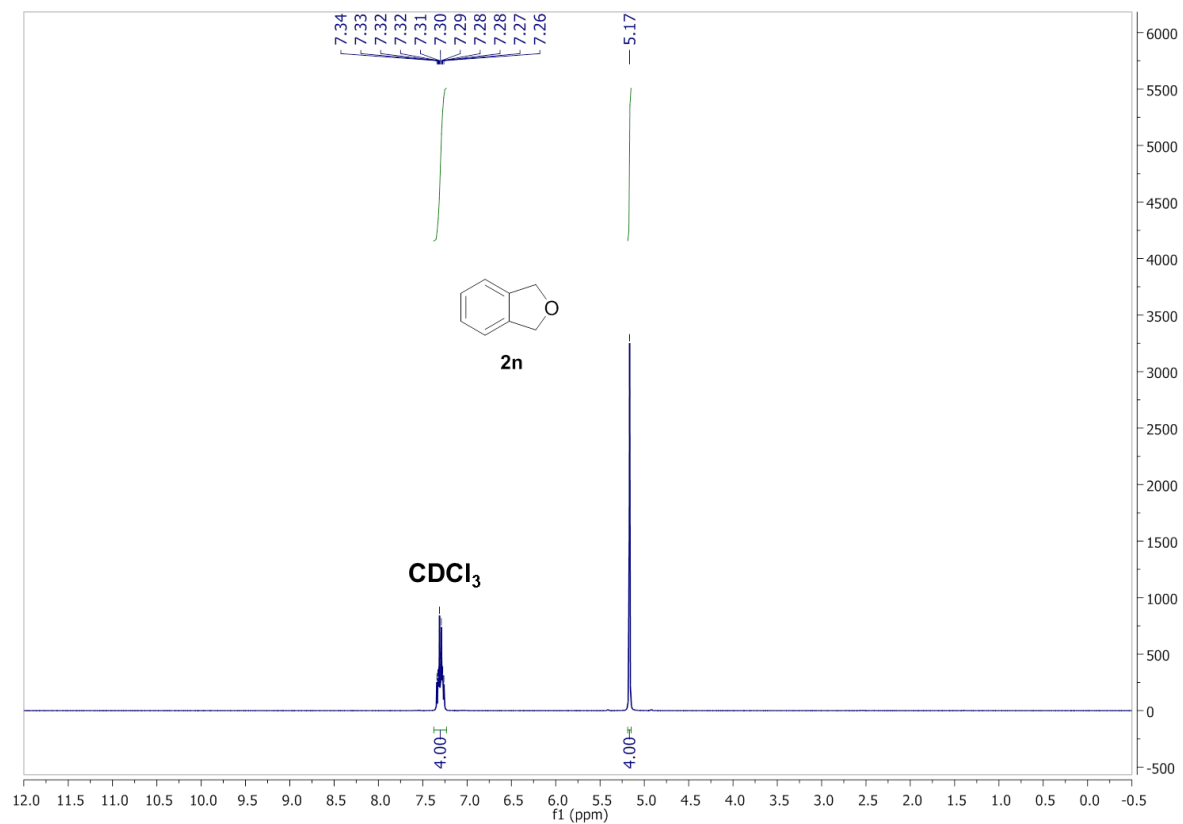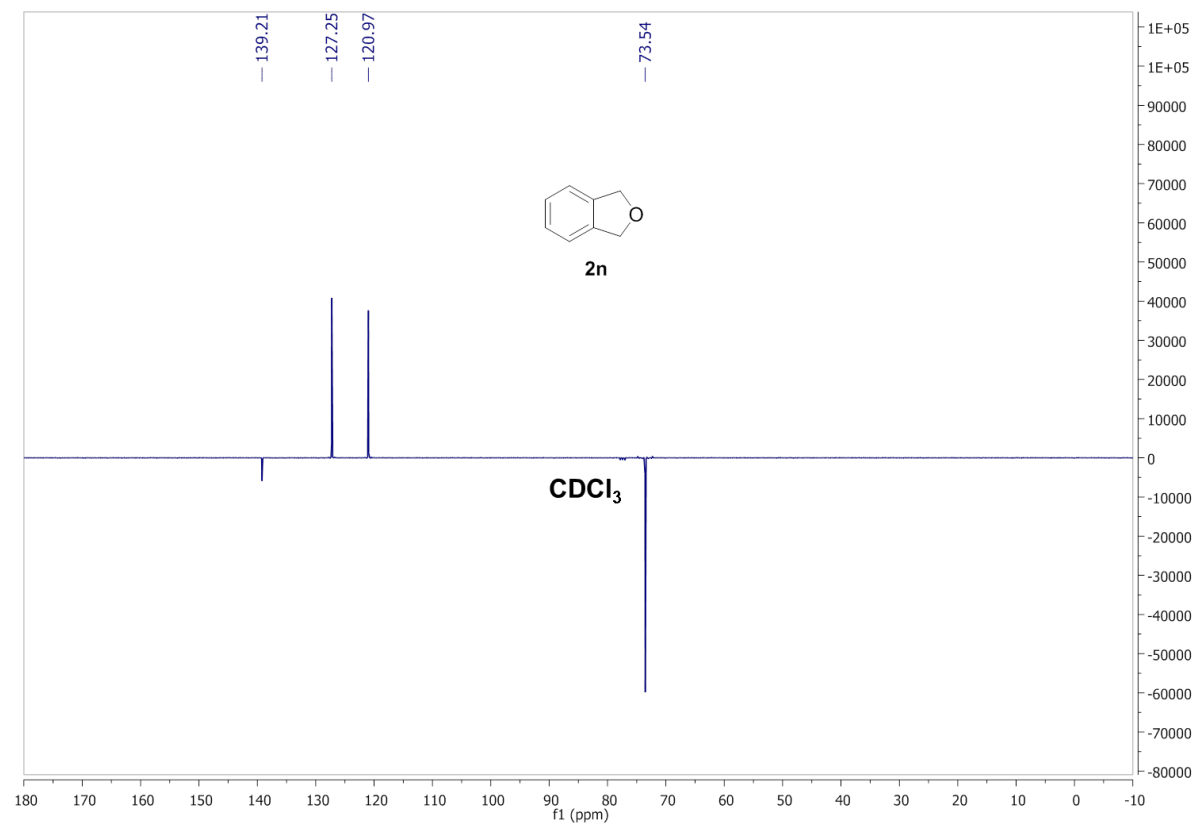

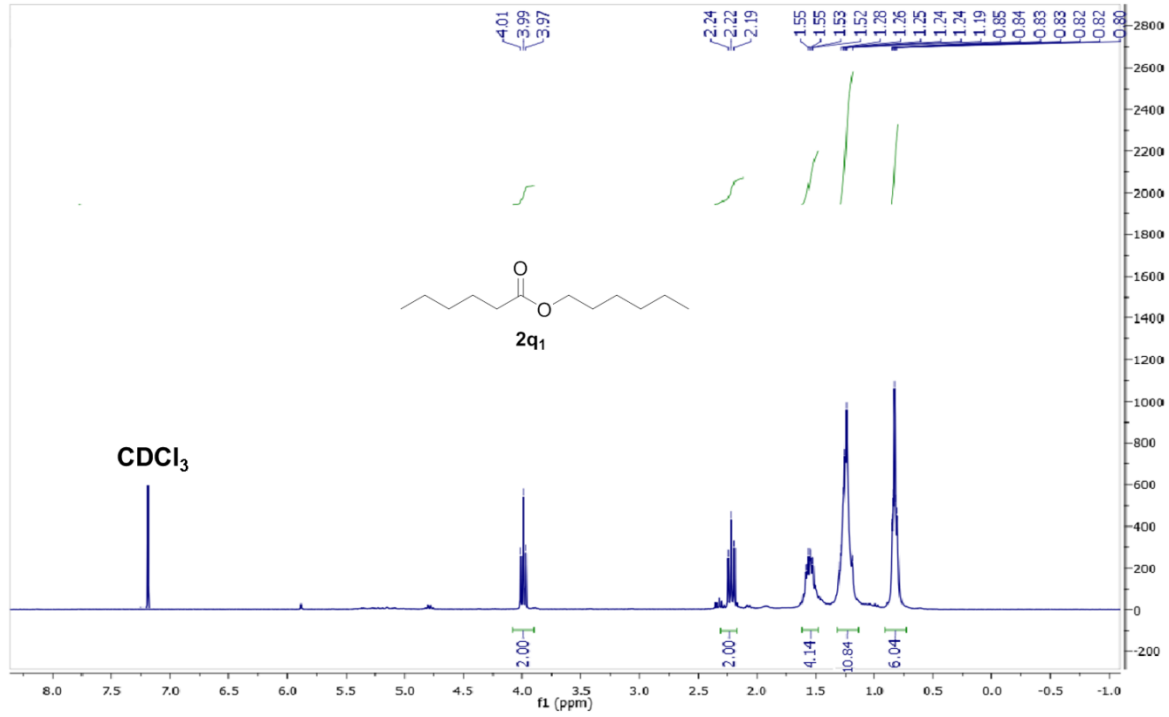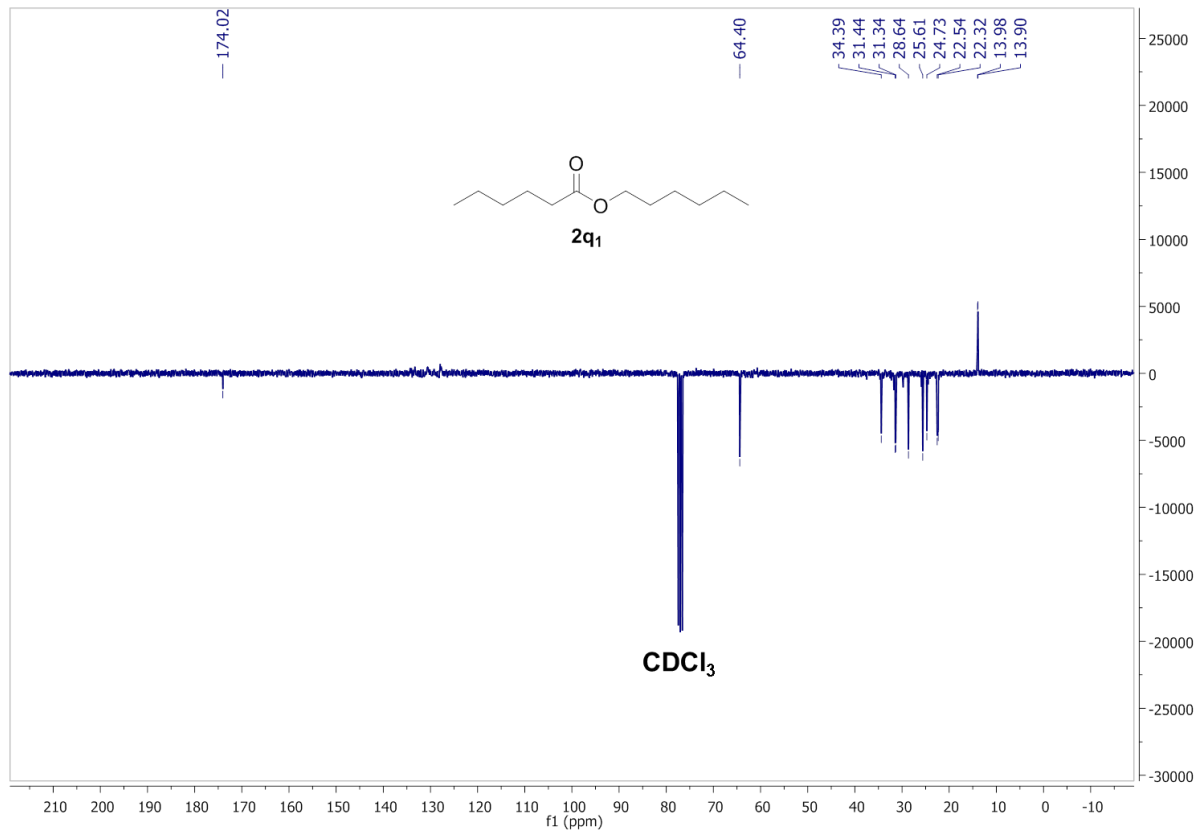



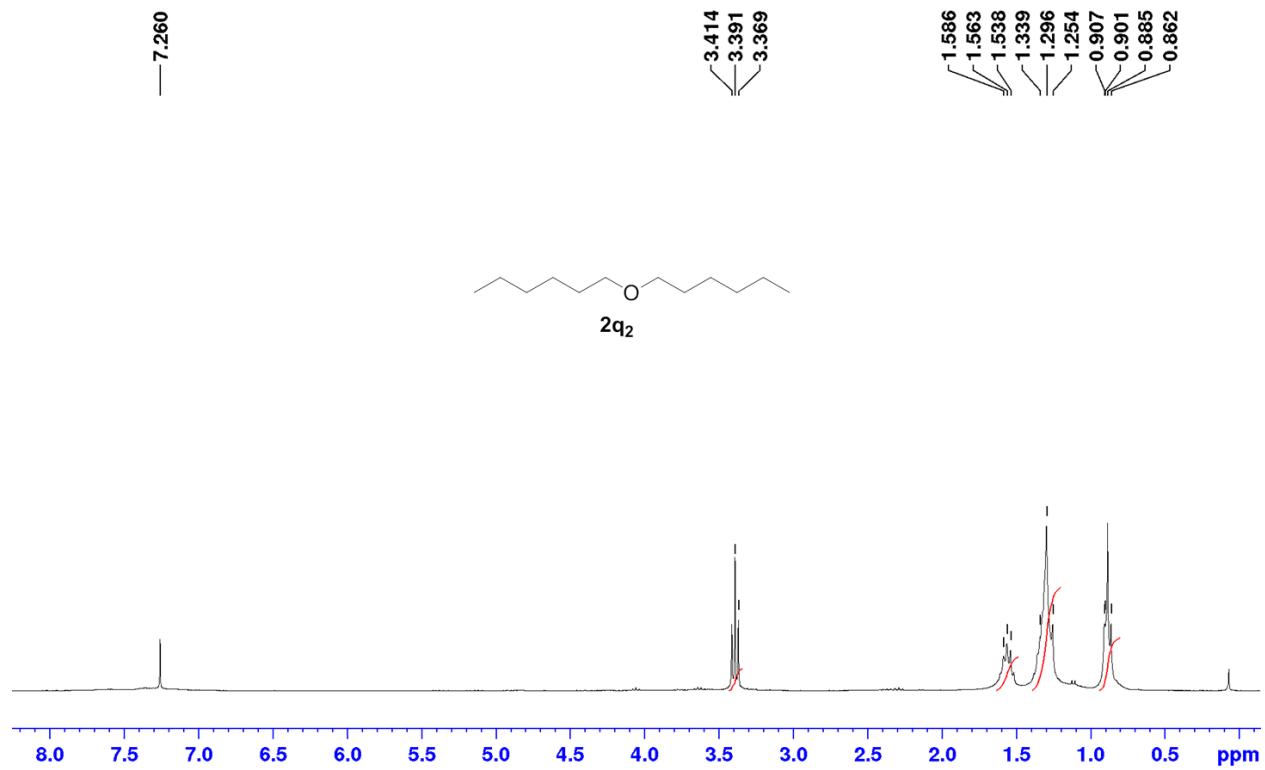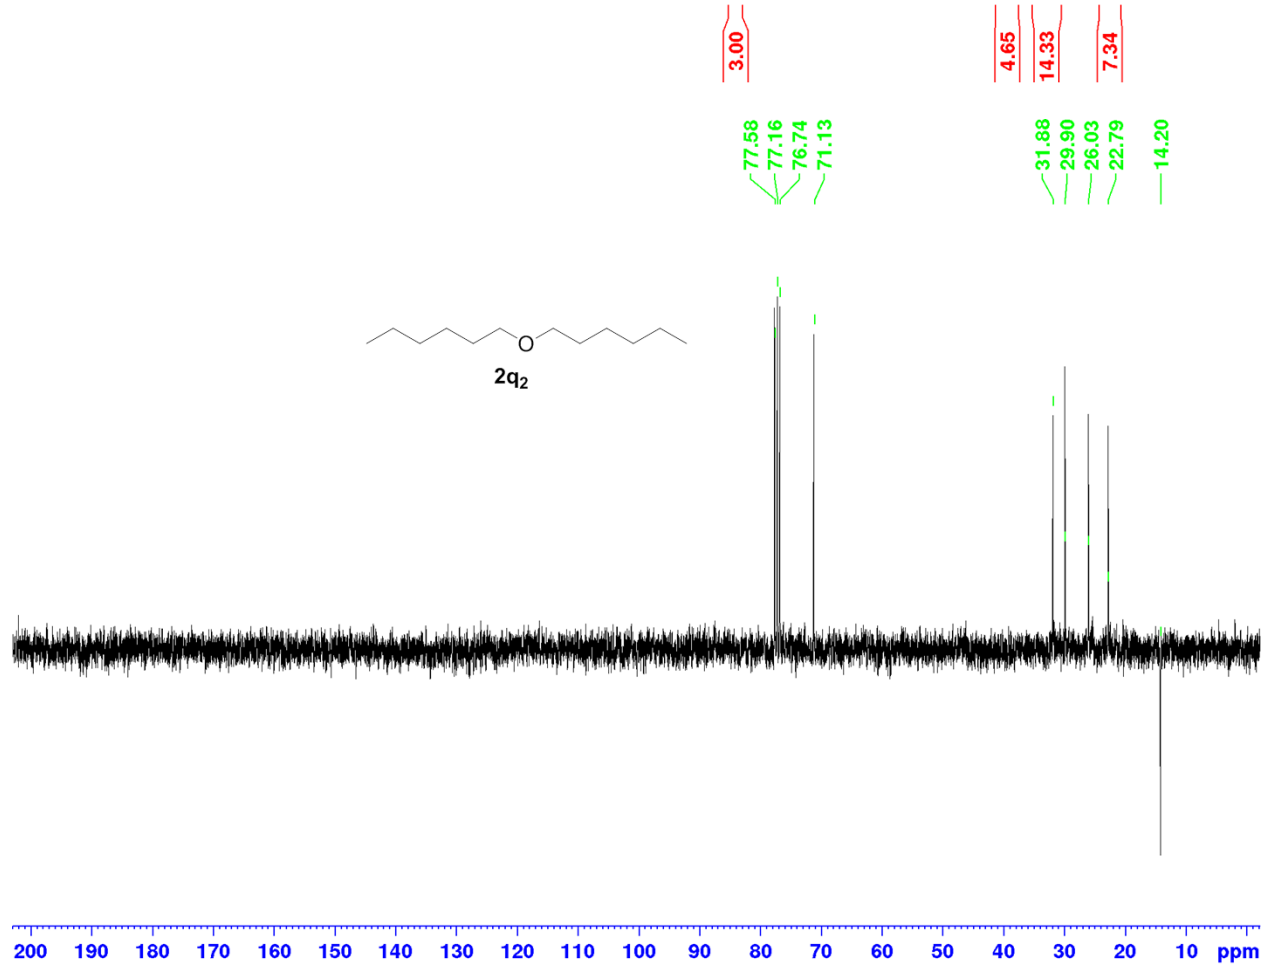

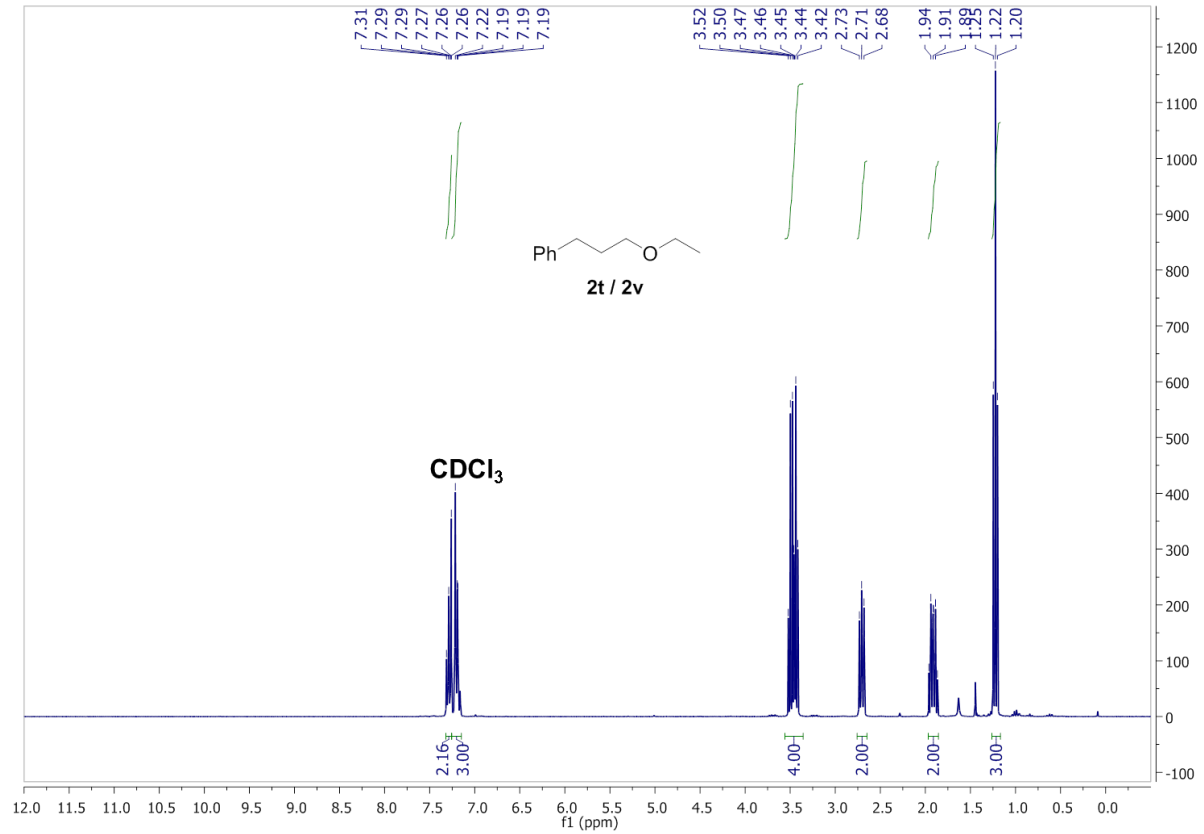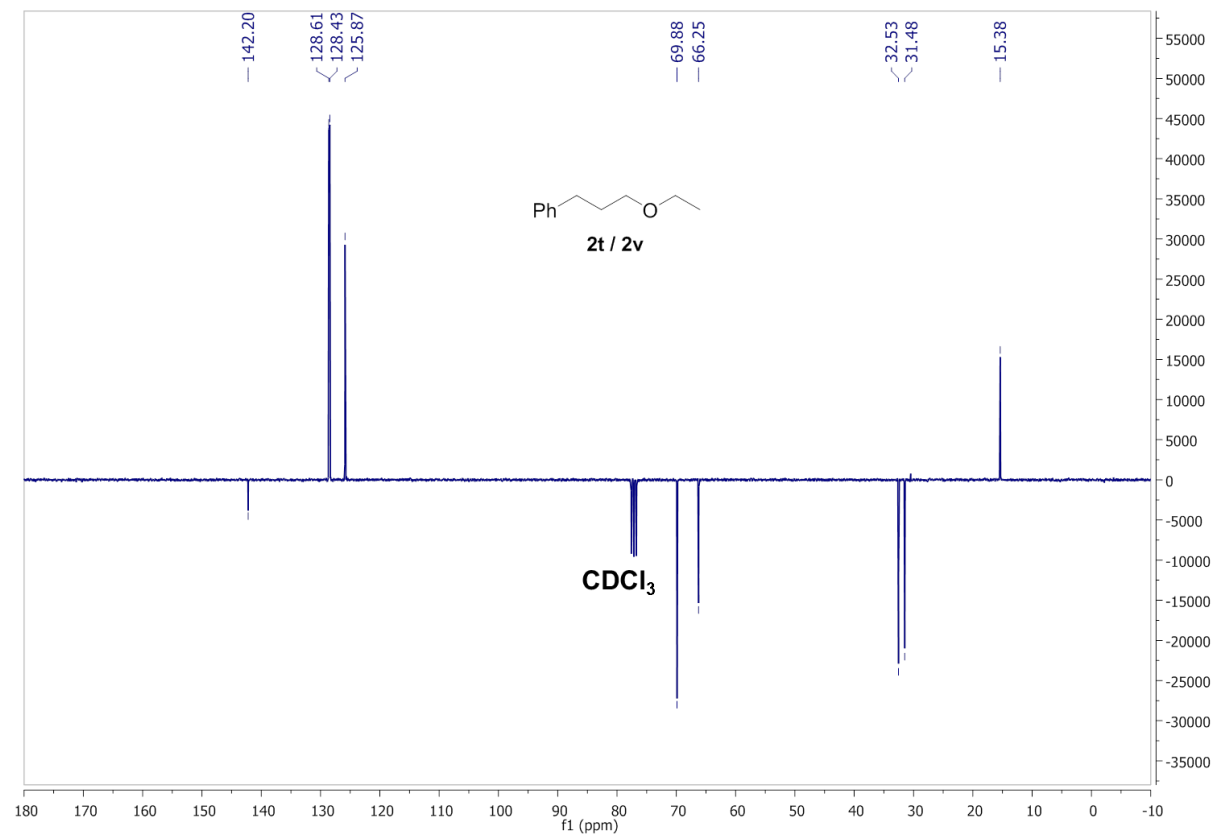

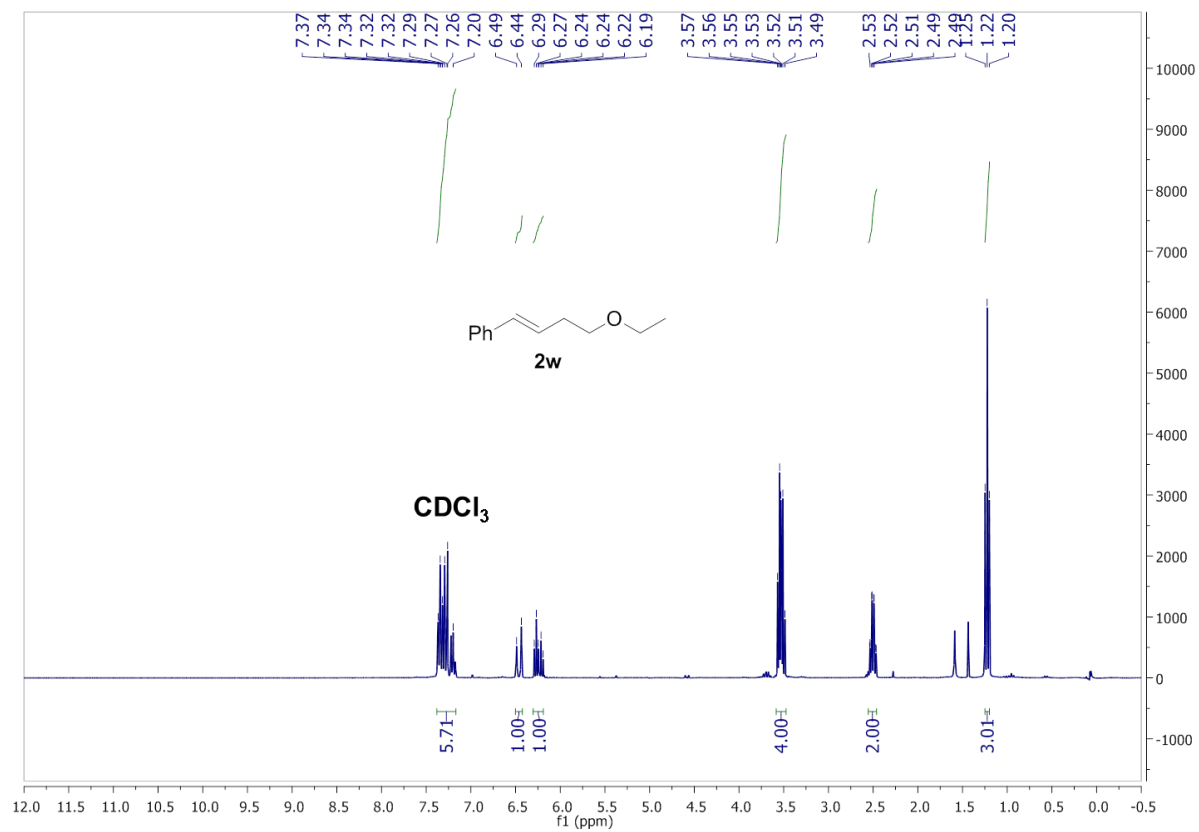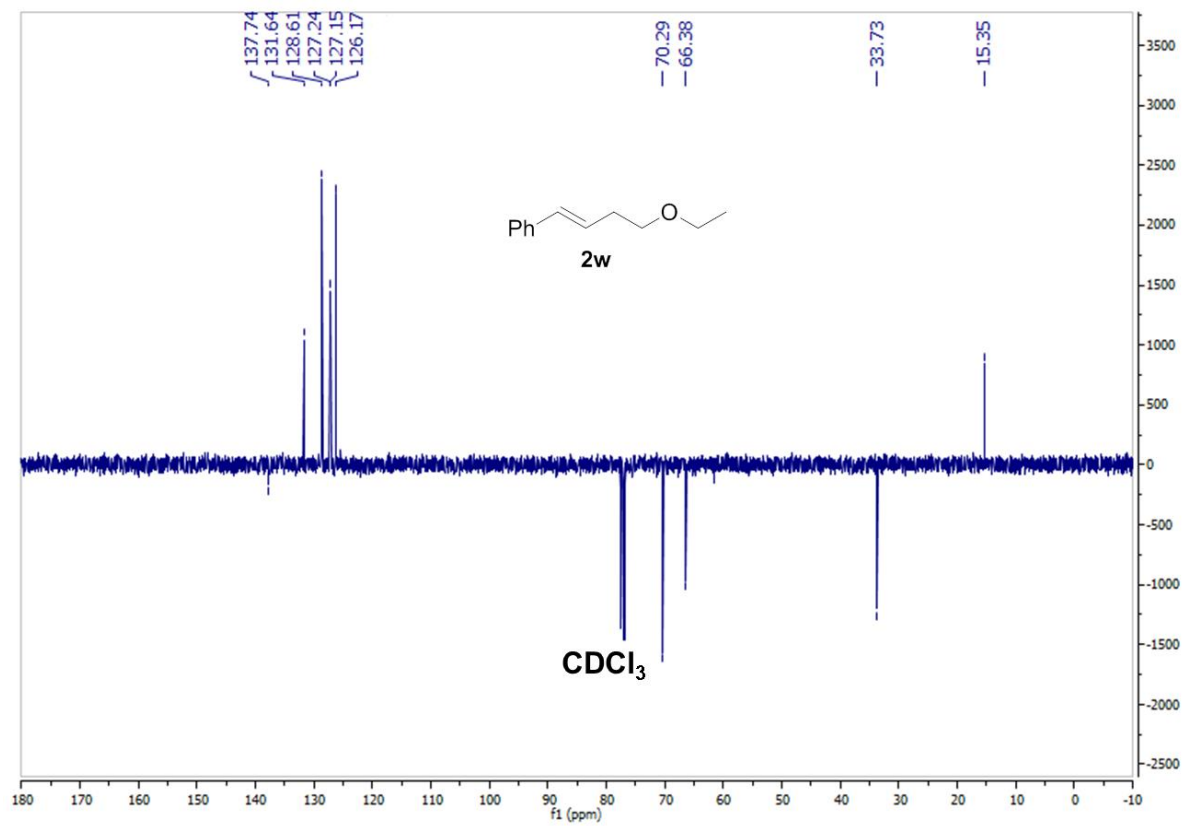

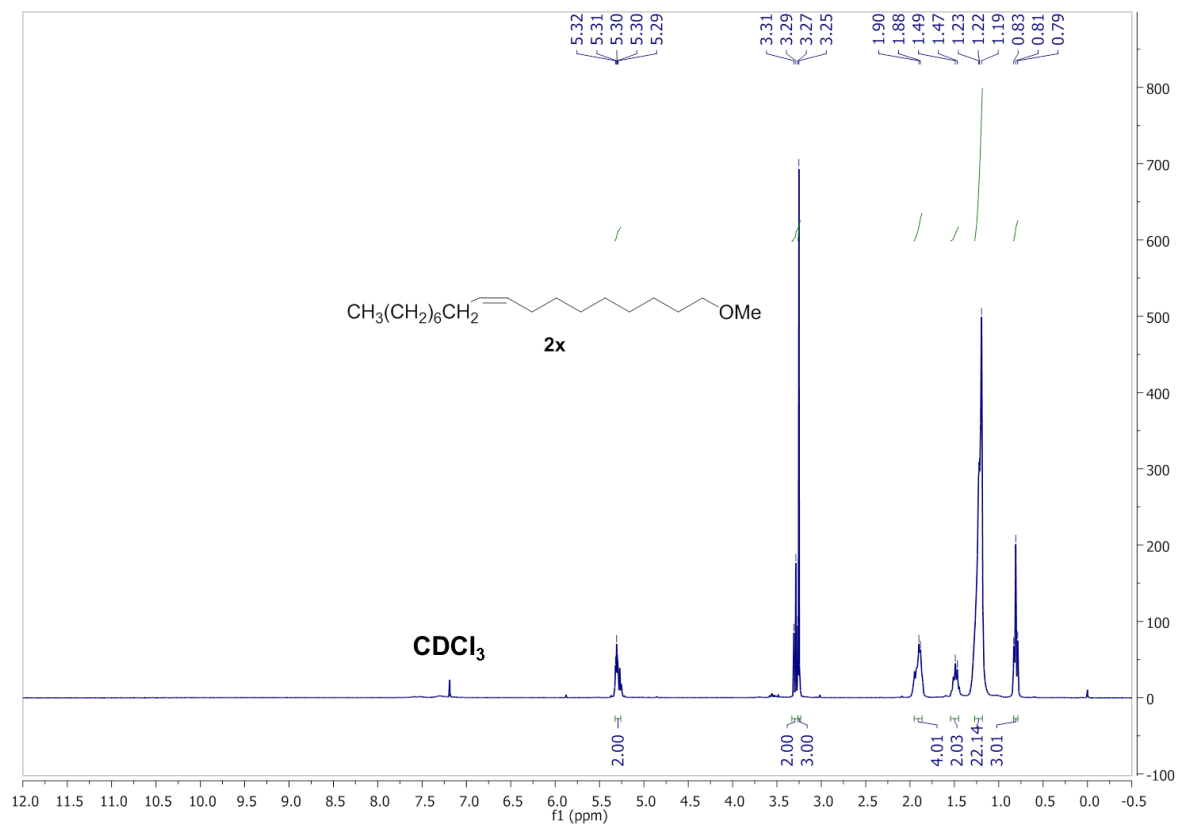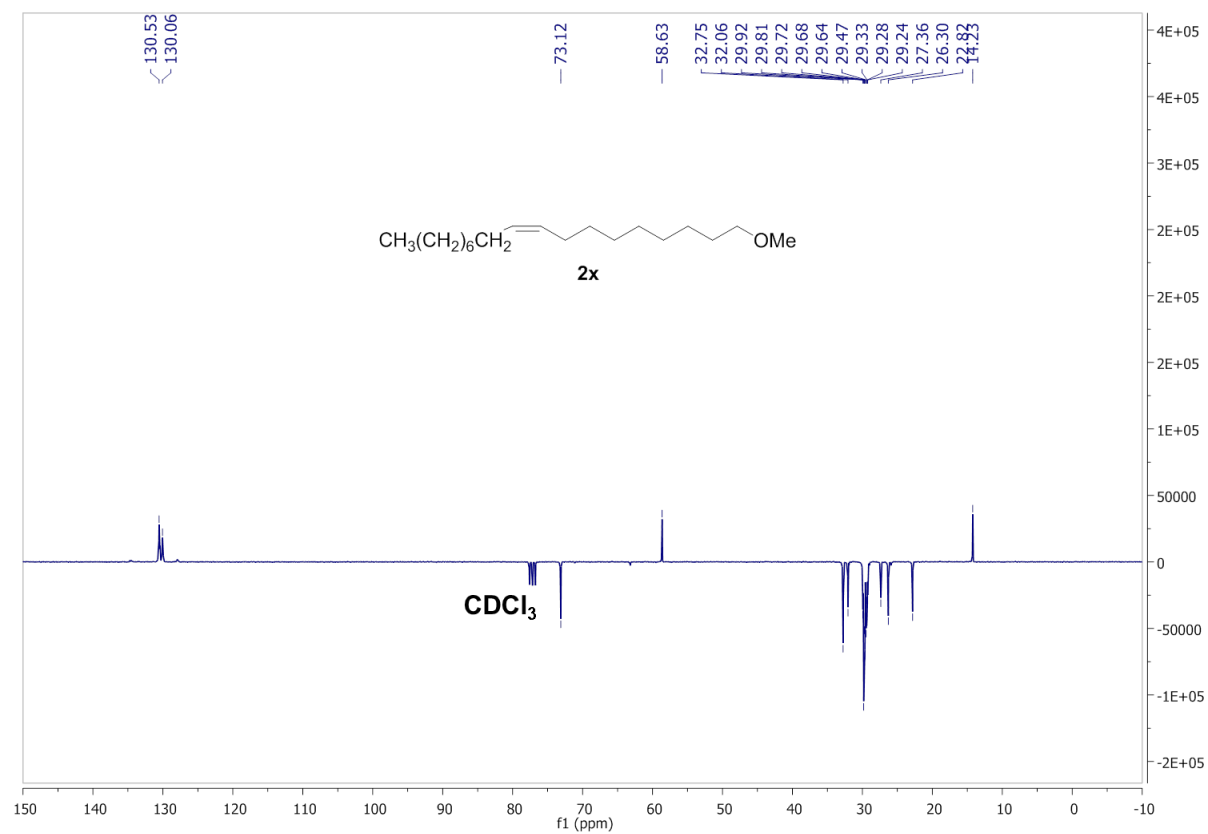

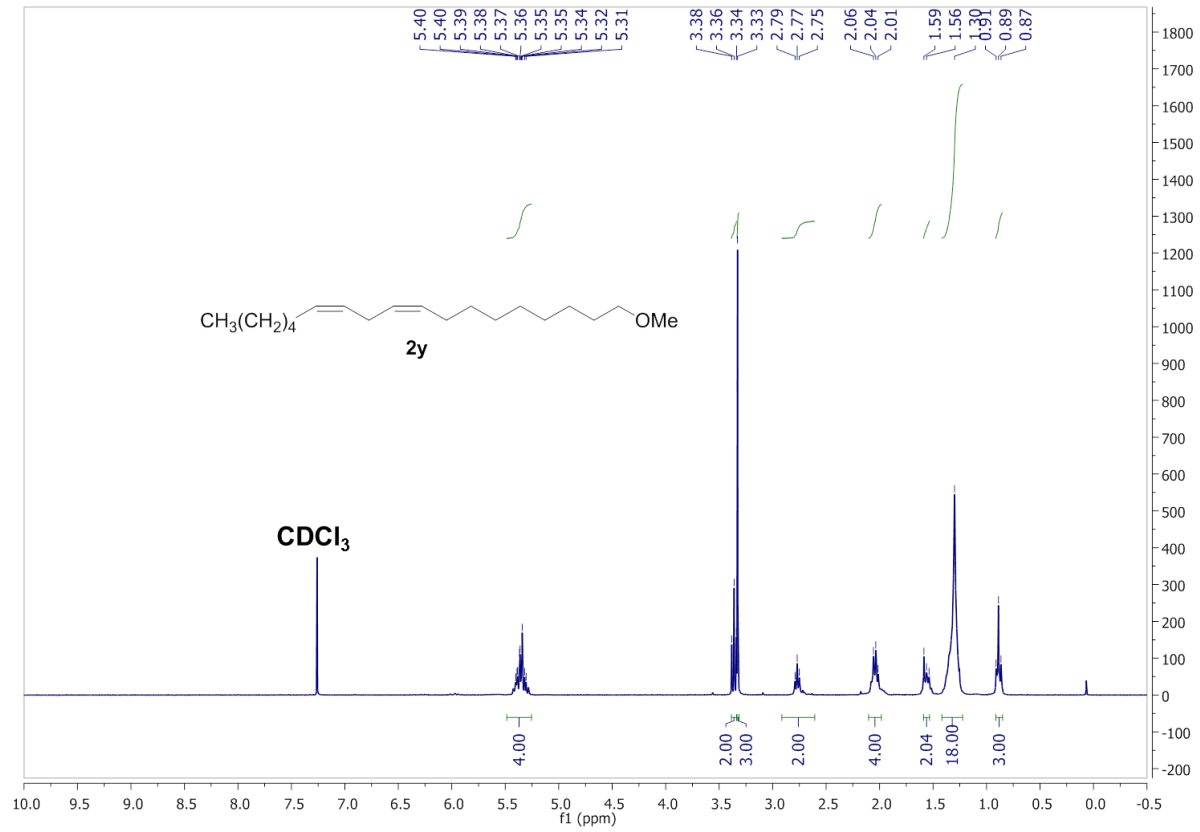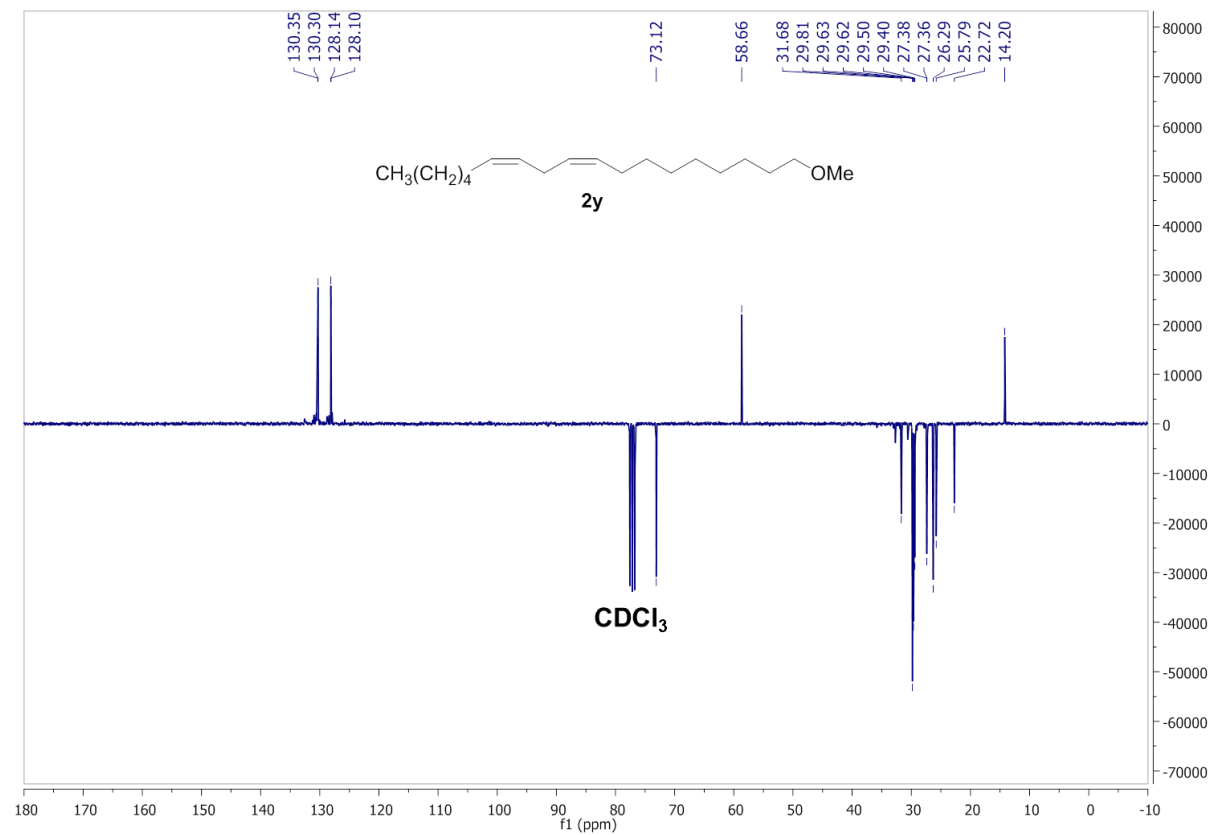

## VIII) Computational details

### PBE/TZVP optimized geometries for all the compounds and transition states

$K^+(BL_4)^-$

70

|   |            |            |            |
|---|------------|------------|------------|
| C | 12.9118270 | 12.6479130 | 20.9332000 |
| C | 12.1075030 | 12.3630900 | 22.0543770 |
| C | 11.1885180 | 11.3073260 | 22.0643320 |
| C | 11.0422290 | 10.4759180 | 20.9532890 |
| C | 11.8243790 | 10.7448760 | 19.8291330 |
| C | 12.7323220 | 11.8106200 | 19.8198530 |
| C | 12.0396550 | 15.5563250 | 21.5891580 |
| C | 13.3647360 | 15.1363530 | 21.8235640 |
| C | 14.0975320 | 15.9020340 | 22.7440360 |
| C | 13.5601410 | 17.0391930 | 23.3664830 |
| C | 12.2484380 | 17.4411900 | 23.1161600 |
| C | 11.4897950 | 16.6722510 | 22.2284880 |
| B | 14.0034820 | 13.8691010 | 20.9891090 |
| C | 15.3691400 | 13.3973780 | 21.7751470 |
| C | 16.5881310 | 14.0461270 | 21.5257180 |
| C | 17.7285510 | 13.8406080 | 22.3102780 |
| C | 17.7101150 | 12.9242190 | 23.3603480 |
| C | 16.5182440 | 12.2306770 | 23.6004160 |
| C | 15.3752330 | 12.4645560 | 22.8283100 |
| C | 16.4881320 | 11.1887690 | 24.6893390 |
| F | 17.2837000 | 11.5225460 | 25.7466780 |
| C | 18.9500950 | 14.6543280 | 21.9978680 |
| F | 18.6332910 | 16.0126760 | 21.9475170 |
| C | 10.0680430 | 17.0599520 | 21.9107810 |
| F | 9.6682190  | 12.2142320 | 23.6570350 |
| F | 9.2353760  | 15.9800440 | 21.9136270 |
| C | 14.4510710 | 17.8326350 | 24.2794070 |
| F | 15.4978860 | 18.4090190 | 23.5568220 |
| C | 10.3593600 | 11.0880020 | 23.3010180 |
| F | 11.1332220 | 10.7599490 | 24.3827630 |
| C | 11.7356960 | 9.8619690  | 18.6141720 |
| F | 12.8163440 | 9.0220390  | 18.5180390 |
| C | 14.4483410 | 14.3936380 | 19.4971820 |
| C | 15.2305440 | 13.5751060 | 18.6536000 |
| C | 15.6937750 | 14.0141750 | 17.4099980 |
| C | 15.4477050 | 15.3194710 | 16.9708380 |
| C | 14.6902710 | 16.1505060 | 17.7942990 |
| C | 14.1814130 | 15.6859180 | 19.0183330 |
| C | 16.5426670 | 13.0882940 | 16.5759640 |

|   |            |            |            |
|---|------------|------------|------------|
| F | 16.0993800 | 11.8004090 | 16.6297000 |
| C | 14.4581130 | 17.5909890 | 17.4349360 |
| F | 15.0958440 | 18.4226900 | 18.3587590 |
| F | 10.6280190 | 9.0711290  | 18.6113880 |
| F | 11.7128180 | 10.5845590 | 17.4543880 |
| F | 9.4426090  | 10.0926790 | 23.1579890 |
| F | 13.8230040 | 18.8485540 | 24.9084820 |
| F | 15.0504060 | 17.0646410 | 25.2280900 |
| F | 9.5580690  | 17.9612460 | 22.7934540 |
| F | 9.9637880  | 17.6244750 | 20.6666820 |
| F | 19.9381610 | 14.5258930 | 22.9089210 |
| F | 19.4768240 | 14.3667920 | 20.7743770 |
| F | 15.2361190 | 10.9853020 | 25.1826020 |
| F | 16.9338130 | 9.9740970  | 24.2383410 |
| F | 14.9373260 | 17.9376750 | 16.2200650 |
| F | 13.1467410 | 17.9426610 | 17.4778310 |
| F | 16.5735320 | 13.4475240 | 15.2634610 |
| F | 17.8429160 | 13.0689360 | 17.0085890 |
| H | 13.2996700 | 11.9950340 | 18.9058850 |
| H | 10.3290720 | 9.6529570  | 20.9575600 |
| H | 15.1145090 | 15.5955020 | 23.0050740 |
| H | 11.8237950 | 18.3156600 | 23.6070550 |
| H | 18.5916540 | 12.7590630 | 23.9790950 |
| H | 14.4618820 | 11.9155330 | 23.0642630 |
| H | 13.5638350 | 16.3616180 | 19.6161200 |
| H | 15.8372930 | 15.6745910 | 16.0176850 |
| H | 16.6533520 | 14.7398520 | 20.6832930 |
| H | 15.5052280 | 12.5719370 | 18.9881710 |
| H | 11.4166270 | 14.9869290 | 20.8952530 |
| H | 12.1827210 | 12.9953900 | 22.9428070 |
| K | 16.5146840 | 17.8398810 | 20.8865270 |

PhSiH<sub>3</sub>

15

|    |            |            |            |
|----|------------|------------|------------|
| C  | 0.1703290  | -0.7926710 | 0.1686840  |
| C  | 0.1705520  | 0.4033320  | 0.9114660  |
| C  | 1.0400450  | 0.5039890  | 2.0150810  |
| C  | 1.8853780  | -0.5545370 | 2.3629420  |
| C  | 1.8747340  | -1.7355770 | 1.6118470  |
| C  | 1.0154070  | -1.8534370 | 0.5142270  |
| Si | -0.9455700 | 1.8531090  | 0.4241690  |
| H  | -0.1779730 | 2.8854540  | -0.3545930 |
| H  | -2.0741190 | 1.3539630  | -0.4305970 |
| H  | 1.0589370  | 1.4173520  | 2.6160310  |
| H  | 2.5513500  | -0.4587020 | 3.2232600  |
| H  | 2.5326120  | -2.5635060 | 1.8843610  |

|   |            |            |            |
|---|------------|------------|------------|
| H | 1.0003880  | -2.7746200 | -0.0724490 |
| H | -0.4982080 | -0.9040360 | -0.6889650 |
| H | -1.4964390 | 2.5160810  | 1.6540620  |

K<sup>+</sup> (BL<sub>4</sub>)<sup>-</sup> - PhSiH<sub>3</sub>

85

|    |            |            |            |
|----|------------|------------|------------|
| C  | 19.5817790 | 18.2370850 | 19.2500350 |
| C  | 18.7749010 | 18.0953260 | 18.1013850 |
| C  | 17.9346890 | 19.1686720 | 17.7406600 |
| C  | 17.9007450 | 20.3454000 | 18.5023640 |
| C  | 18.7082030 | 20.4670370 | 19.6408850 |
| C  | 19.5505520 | 19.4097660 | 20.0133960 |
| Si | 18.8423290 | 16.5034860 | 17.0671690 |
| F  | 18.5734300 | 16.4188600 | 21.7831140 |
| C  | 18.9999690 | 15.0917220 | 21.7648590 |
| F  | 20.0195900 | 15.0059740 | 22.6463270 |
| C  | 17.8544340 | 14.1717060 | 22.0687650 |
| C  | 16.6766970 | 14.3197360 | 21.3262730 |
| C  | 15.5091040 | 13.5927180 | 21.6086350 |
| C  | 15.6183990 | 12.6311670 | 22.6298930 |
| C  | 16.8016450 | 12.4519770 | 23.3545540 |
| C  | 17.9340700 | 13.2313930 | 23.0948940 |
| B  | 14.0825700 | 14.0357510 | 20.9208130 |
| C  | 13.4783480 | 15.2884630 | 21.8043700 |
| C  | 12.1439900 | 15.7046350 | 21.6209850 |
| C  | 11.6084070 | 16.8047030 | 22.2976610 |
| C  | 12.3872660 | 17.5531120 | 23.1858300 |
| C  | 13.7055290 | 17.1483680 | 23.3926940 |
| C  | 14.2330150 | 16.0329020 | 22.7233840 |
| C  | 16.8699890 | 11.3916590 | 24.4243330 |
| F  | 15.6531830 | 11.1358390 | 24.9794130 |
| C  | 10.1795120 | 17.1959620 | 22.0186870 |
| F  | 9.6925270  | 18.0946590 | 22.9163070 |
| C  | 14.6130560 | 17.9031200 | 24.3218680 |
| F  | 14.0175290 | 18.9467390 | 24.9382550 |
| C  | 14.3887800 | 14.5658800 | 19.3979870 |
| C  | 14.0600600 | 15.8549800 | 18.9489920 |
| C  | 14.4156530 | 16.3178550 | 17.6731810 |
| C  | 15.0786200 | 15.4885120 | 16.7697260 |
| C  | 15.4039780 | 14.1949350 | 17.1892520 |
| C  | 15.0839190 | 13.7530960 | 18.4775140 |
| C  | 16.1215320 | 13.2484610 | 16.2595610 |
| F  | 16.5230720 | 13.8456170 | 15.1042380 |
| C  | 14.0944070 | 17.7449950 | 17.3293040 |
| F  | 14.5652000 | 18.1330190 | 16.1214660 |



|   |            |            |            |
|---|------------|------------|------------|
| C | 12.9901400 | 12.8159810 | 20.9587890 |
| C | 12.3655500 | 12.4837860 | 22.1774410 |
| C | 11.4460730 | 11.4354660 | 22.2831600 |
| C | 11.0921350 | 10.6814370 | 21.1628030 |
| C | 11.6827660 | 11.0076430 | 19.9406690 |
| C | 12.6135920 | 12.0505420 | 19.8434180 |
| C | 10.7915710 | 11.1750610 | 23.6132300 |
| F | 11.6767140 | 11.2770970 | 24.6490020 |
| C | 11.3588550 | 10.1939770 | 18.7166650 |
| F | 10.1489000 | 9.5722280  | 18.8023330 |
| F | 19.5188070 | 14.8991990 | 20.5182150 |
| F | 17.3324670 | 10.2006970 | 23.9302660 |
| F | 17.7079550 | 11.7376810 | 25.4441020 |
| F | 17.2370990 | 12.7146510 | 16.8408460 |
| F | 15.3296050 | 12.1913020 | 15.9068240 |
| F | 12.7620400 | 18.0102160 | 17.3568600 |
| F | 14.6660460 | 18.6066070 | 18.2638880 |
| F | 10.2273040 | 9.9381870  | 23.6939150 |
| F | 9.7930390  | 12.0784100 | 23.8730520 |
| F | 11.3382380 | 10.9523780 | 17.5824070 |
| F | 12.2880230 | 9.2079930  | 18.5014710 |
| F | 15.1539390 | 17.1081730 | 25.2841290 |
| F | 15.7009450 | 18.4267390 | 23.6234880 |
| F | 10.0460390 | 17.7647290 | 20.7792810 |
| F | 9.3454440  | 16.1172570 | 22.0378540 |
| K | 16.3307230 | 18.1753070 | 20.7552110 |
| H | 13.0372030 | 12.2778150 | 18.8634640 |
| H | 10.3697390 | 9.8692290  | 21.2382700 |
| H | 15.2601020 | 15.7296500 | 22.9444230 |
| H | 11.9730780 | 18.4131180 | 23.7100380 |
| H | 18.8434510 | 13.1174280 | 23.6839470 |
| H | 14.7527940 | 12.0183920 | 22.8863200 |
| H | 13.5061160 | 16.5269020 | 19.6096320 |
| H | 15.3486210 | 15.8404520 | 15.7754940 |
| H | 16.6622480 | 15.0414880 | 20.5040560 |
| H | 15.4053660 | 12.7544870 | 18.7848200 |
| H | 11.5037030 | 15.1473150 | 20.9327520 |
| H | 12.5947280 | 13.0670310 | 23.0725950 |
| H | 18.2818280 | 15.3556260 | 17.8574220 |
| H | 18.0194190 | 16.6975600 | 15.8292680 |
| H | 20.2618560 | 16.1848540 | 16.7064710 |
| H | 17.3056650 | 19.0947670 | 16.8502990 |
| H | 17.2490660 | 21.1687640 | 18.2029140 |
| H | 18.6910110 | 21.3864620 | 20.2293360 |
| H | 20.1864790 | 19.5009320 | 20.8962620 |
| H | 20.2484370 | 17.4265180 | 19.5534550 |

Ester

24

|   |            |            |            |
|---|------------|------------|------------|
| H | -1.1609130 | -0.5382130 | 0.2997660  |
| C | -0.6237730 | 0.1461910  | 0.9693260  |
| H | 0.4562440  | -0.0117010 | 0.8527580  |
| C | -1.0439450 | -0.0873550 | 2.4093400  |
| C | -2.3023300 | -0.6318580 | 2.7071860  |
| C | -2.6982650 | -0.8210640 | 4.0348330  |
| C | -1.8418770 | -0.4631390 | 5.0816690  |
| C | -0.5870040 | 0.0843490  | 4.7931270  |
| C | -0.1917140 | 0.2720240  | 3.4652440  |
| H | -2.9748100 | -0.9116260 | 1.8925220  |
| H | -3.6778990 | -1.2522510 | 4.2515890  |
| H | -2.1497570 | -0.6142960 | 6.1181660  |
| H | 0.0888240  | 0.3634990  | 5.6042410  |
| H | 0.7892180  | 0.6996240  | 3.2436020  |
| C | -0.9193900 | 1.5826640  | 0.5707120  |
| O | -2.1756660 | 1.7029730  | 0.0821970  |
| O | -0.1431760 | 2.5151120  | 0.7119990  |
| C | -2.6216810 | 3.0510500  | -0.2818440 |
| C | -2.2246390 | 3.3945750  | -1.7054430 |
| H | -3.7115230 | 3.0062180  | -0.1643960 |
| H | -2.2056640 | 3.7666350  | 0.4403460  |
| H | -2.6412360 | 4.3772570  | -1.9722470 |
| H | -1.1323640 | 3.4447640  | -1.8114290 |
| H | -2.6190040 | 2.6512810  | -2.4127780 |

Catalyst\_int\_1

109

|    |            |            |            |
|----|------------|------------|------------|
| C  | 17.0853980 | 20.7422910 | 19.3242050 |
| C  | 17.9849920 | 19.9159480 | 20.0263070 |
| C  | 18.1555010 | 18.5883350 | 19.5843470 |
| C  | 17.4553020 | 18.1034910 | 18.4744250 |
| C  | 16.5760910 | 18.9435280 | 17.7782330 |
| C  | 16.3851120 | 20.2620620 | 18.2091360 |
| Si | 18.9889970 | 20.5926940 | 21.4863660 |
| O  | 15.8134210 | 18.1058050 | 23.1466030 |
| C  | 15.9953120 | 19.2044760 | 23.6458930 |
| O  | 15.6402910 | 20.2844080 | 22.8896240 |
| C  | 15.6704720 | 21.6639600 | 23.3890300 |
| C  | 14.3572470 | 22.0488550 | 24.0398720 |
| C  | 16.5931680 | 19.4443850 | 25.0180990 |
| C  | 17.0793510 | 18.1886550 | 25.6980750 |
| C  | 18.4394530 | 17.8529090 | 25.6688200 |

|   |            |            |            |
|---|------------|------------|------------|
| C | 18.9029590 | 16.7032670 | 26.3151860 |
| C | 18.0073980 | 15.8765380 | 26.9998310 |
| C | 16.6467330 | 16.2007210 | 27.0267040 |
| C | 16.1868750 | 17.3507870 | 26.3813470 |
| K | 14.5536890 | 18.6064820 | 20.6841040 |
| F | 12.8609110 | 17.4566720 | 25.4391280 |
| C | 12.1653200 | 18.0547840 | 24.4301710 |
| F | 11.0618800 | 18.6195890 | 24.9872330 |
| C | 11.8440490 | 17.0986280 | 23.3139530 |
| C | 12.8618060 | 16.2697780 | 22.8095260 |
| C | 12.6237900 | 15.3740160 | 21.7524210 |
| C | 11.3102870 | 15.3523060 | 21.2351880 |
| C | 10.2995410 | 16.1773180 | 21.7334570 |
| C | 10.5567050 | 17.0684710 | 22.7790760 |
| B | 13.7650350 | 14.3902860 | 21.0962920 |
| C | 14.1824800 | 14.9455180 | 19.6067340 |
| C | 15.2747390 | 14.3957220 | 18.8989590 |
| C | 15.5973810 | 14.7917340 | 17.5967350 |
| C | 14.8775930 | 15.8014200 | 16.9509660 |
| C | 13.8175410 | 16.3850480 | 17.6428900 |
| C | 13.4694290 | 15.9487970 | 18.9294410 |
| C | 8.9369340  | 16.1437630 | 21.0925660 |
| F | 8.9006620  | 16.9110620 | 19.9555420 |
| C | 16.7822600 | 14.1533860 | 16.9168120 |
| F | 17.9661850 | 14.6346700 | 17.4179310 |
| C | 13.0284330 | 17.5190330 | 17.0484880 |
| F | 11.7186150 | 17.2068020 | 16.8562010 |
| C | 13.1104010 | 12.8794230 | 20.9568500 |
| C | 12.2488920 | 12.3821090 | 21.9537940 |
| C | 11.7162190 | 11.0883300 | 21.9055940 |
| C | 12.0033940 | 10.2347340 | 20.8401910 |
| C | 12.8340600 | 10.7163270 | 19.8259940 |
| C | 13.3762380 | 12.0053070 | 19.8888850 |
| C | 10.7963780 | 10.6537130 | 23.0146020 |
| F | 10.4401650 | 9.3427380  | 22.9316510 |
| C | 13.1941880 | 9.8287020  | 18.6650060 |
| F | 13.2768750 | 10.5222930 | 17.4909620 |
| C | 15.0791670 | 14.3127630 | 22.0881430 |
| C | 16.2935880 | 14.9717820 | 21.8317960 |
| C | 17.3866780 | 14.8921710 | 22.7054700 |
| C | 17.2977000 | 14.1786740 | 23.8990040 |
| C | 16.0929170 | 13.5352100 | 24.1871290 |
| C | 15.0172780 | 13.5952270 | 23.2970470 |
| C | 18.6657740 | 15.5917580 | 22.3351600 |
| F | 19.0090610 | 15.3529010 | 21.0268630 |
| C | 15.9244270 | 12.7437370 | 25.4552940 |

|   |            |            |            |
|---|------------|------------|------------|
| F | 15.5945780 | 11.4387210 | 25.2004220 |
| F | 17.0456840 | 12.7215460 | 26.2260510 |
| F | 14.9159680 | 13.2401200 | 26.2395900 |
| F | 18.5797730 | 16.9504150 | 22.4553590 |
| F | 19.7254110 | 15.2009980 | 23.0956250 |
| F | 8.5717000  | 14.8854940 | 20.7192330 |
| F | 7.9585240  | 16.6187600 | 21.9126480 |
| F | 12.9515450 | 19.0959030 | 23.9870400 |
| F | 9.6347790  | 11.3796300 | 23.0247840 |
| F | 11.3649150 | 10.8324540 | 24.2467780 |
| F | 14.4156330 | 9.2290640  | 18.8399960 |
| F | 12.2944950 | 8.8245810  | 18.4705220 |
| F | 16.8097710 | 12.8032440 | 17.0972900 |
| F | 16.8058020 | 14.3815960 | 15.5762360 |
| F | 13.0332760 | 18.6135010 | 17.9022360 |
| F | 13.5208400 | 17.9560010 | 15.8642940 |
| H | 14.0077330 | 12.3346850 | 19.0628820 |
| H | 11.5820830 | 9.2314500  | 20.7947010 |
| H | 13.8555350 | 16.3169390 | 23.2642990 |
| H | 9.7691940  | 17.7078630 | 23.1754400 |
| H | 18.1412550 | 14.1236500 | 24.5839510 |
| H | 14.1049170 | 13.0533420 | 23.5545470 |
| H | 12.5971930 | 16.4013890 | 19.4086950 |
| H | 15.1380350 | 16.1209250 | 15.9428180 |
| H | 16.4141280 | 15.5472790 | 20.9113180 |
| H | 15.8878350 | 13.6277920 | 19.3766710 |
| H | 11.0689430 | 14.6544700 | 20.4298500 |
| H | 11.9666780 | 13.0259750 | 22.7903600 |
| H | 20.4506370 | 20.6210530 | 21.1466110 |
| H | 16.9323500 | 21.7774270 | 19.6404230 |
| H | 18.8081180 | 19.7318880 | 22.7016430 |
| H | 18.5197270 | 21.9856210 | 21.7886420 |
| H | 18.8456470 | 17.9212770 | 20.1046780 |
| H | 17.6134710 | 17.0755800 | 18.1429890 |
| H | 16.0491190 | 18.5771240 | 16.8956900 |
| H | 15.7027520 | 20.9214330 | 17.6683980 |
| H | 14.3940890 | 23.1133450 | 24.3137830 |
| H | 14.1636950 | 21.4686270 | 24.9523610 |
| H | 13.5186110 | 21.8991190 | 23.3465930 |
| H | 17.4212430 | 20.1630530 | 24.9164070 |
| H | 15.8297920 | 19.9500900 | 25.6326080 |
| H | 19.1428870 | 18.4951780 | 25.1333100 |
| H | 19.9653560 | 16.4535560 | 26.2829610 |
| H | 18.3658170 | 14.9767360 | 27.5032490 |
| H | 15.9404100 | 15.5532950 | 27.5496290 |
| H | 15.1238720 | 17.5986560 | 26.4059950 |

|   |            |            |            |
|---|------------|------------|------------|
| H | 16.5248490 | 21.7979620 | 24.0650170 |
| H | 15.8564010 | 22.2597940 | 22.4865280 |

Catalyst\_ts\_1

109

|    |            |            |            |
|----|------------|------------|------------|
| C  | 18.0725440 | 19.8492380 | 18.2087310 |
| C  | 18.4427280 | 19.6527020 | 19.5449250 |
| C  | 18.2043160 | 20.6492820 | 20.5122810 |
| C  | 17.5926520 | 21.8504790 | 20.1036420 |
| C  | 17.2066510 | 22.0421550 | 18.7732340 |
| C  | 17.4420590 | 21.0395690 | 17.8248620 |
| Si | 18.6426970 | 20.3660430 | 22.3217830 |
| O  | 16.8713540 | 19.1156010 | 22.6002880 |
| C  | 16.3586420 | 20.1819460 | 23.1418690 |
| O  | 15.3161410 | 20.6992560 | 22.3967820 |
| C  | 14.6896010 | 21.9672540 | 22.7783190 |
| C  | 13.3328710 | 21.7468640 | 23.4168530 |
| C  | 16.2195490 | 20.2532300 | 24.6744120 |
| C  | 17.5402810 | 20.2742800 | 25.3943430 |
| C  | 18.0619800 | 21.4991390 | 25.8460390 |
| C  | 19.3048240 | 21.5552630 | 26.4790510 |
| C  | 20.0424210 | 20.3819090 | 26.6727180 |
| C  | 19.5309080 | 19.1580670 | 26.2314210 |
| C  | 18.2872970 | 19.1030600 | 25.5943860 |
| K  | 15.2794420 | 18.8489320 | 20.2602330 |
| F  | 12.5057270 | 18.9436780 | 21.2661580 |
| C  | 11.9150220 | 18.1104930 | 22.2157620 |
| F  | 11.0882780 | 17.2920560 | 21.5129850 |
| C  | 12.9641370 | 17.3556350 | 22.9822970 |
| C  | 13.2052030 | 17.6274000 | 24.3290860 |
| C  | 14.2164850 | 16.9018500 | 24.9645840 |
| C  | 14.9740960 | 15.9515690 | 24.2682590 |
| C  | 14.7618170 | 15.6738730 | 22.9041590 |
| C  | 13.7175880 | 16.3938760 | 22.2975650 |
| B  | 15.5906730 | 14.4971580 | 22.0881890 |
| C  | 16.0989430 | 15.0694230 | 20.6238120 |
| C  | 17.4485590 | 15.2990810 | 20.2952760 |
| C  | 17.8433990 | 15.7856660 | 19.0421670 |
| C  | 16.9008980 | 16.1049140 | 18.0628030 |
| C  | 15.5550700 | 15.8762510 | 18.3596970 |
| C  | 15.1713680 | 15.3347690 | 19.5940880 |
| C  | 14.4537570 | 17.1054440 | 26.4394670 |
| F  | 13.6952070 | 16.2612000 | 27.2014910 |
| C  | 19.3126280 | 15.9031670 | 18.7265160 |
| F  | 19.8353280 | 14.7159310 | 18.3000350 |

|   |            |            |            |
|---|------------|------------|------------|
| C | 14.4886290 | 16.3200350 | 17.3980220 |
| F | 13.9987120 | 17.5678640 | 17.7891670 |
| C | 16.8695160 | 13.9872950 | 22.9771070 |
| C | 17.0598250 | 12.6436210 | 23.3339460 |
| C | 18.1645420 | 12.2214630 | 24.0874180 |
| C | 19.1373200 | 13.1286560 | 24.4993600 |
| C | 18.9712480 | 14.4734480 | 24.1532120 |
| C | 17.8551340 | 14.8948090 | 23.4239110 |
| C | 19.9858270 | 15.4708190 | 24.6377730 |
| F | 19.9915310 | 16.6140980 | 23.8994770 |
| C | 18.2993590 | 10.7596610 | 24.4197620 |
| F | 19.2582310 | 10.5154380 | 25.3549390 |
| C | 14.5728830 | 13.2357950 | 21.8306880 |
| C | 13.5186610 | 12.9299210 | 22.7079270 |
| C | 12.7120020 | 11.7982860 | 22.5296650 |
| C | 12.9207550 | 10.9297540 | 21.4561570 |
| C | 13.9640540 | 11.2174890 | 20.5735930 |
| C | 14.7744180 | 12.3431300 | 20.7624960 |
| C | 11.5891340 | 11.5531250 | 23.5011580 |
| F | 10.5944050 | 12.4883490 | 23.3737530 |
| C | 14.2579480 | 10.3123060 | 19.4077520 |
| F | 15.4714660 | 9.6905240  | 19.5396840 |
| F | 12.0107320 | 11.6234720 | 24.8002070 |
| F | 11.0031690 | 10.3351740 | 23.3414830 |
| F | 13.3290930 | 9.3317540  | 19.2457910 |
| F | 14.3136490 | 11.0049940 | 18.2280550 |
| F | 19.7428140 | 15.8458180 | 25.9384330 |
| F | 21.2573440 | 14.9759820 | 24.6175100 |
| F | 17.1319680 | 10.2366280 | 24.9000870 |
| F | 18.6263580 | 10.0136330 | 23.3175720 |
| F | 14.1427600 | 18.3745050 | 26.8419220 |
| F | 15.7525400 | 16.8866220 | 26.7887940 |
| F | 11.1441060 | 18.9073210 | 22.9899540 |
| F | 19.5613880 | 16.8155820 | 17.7416020 |
| F | 20.0436790 | 16.2841590 | 19.8133580 |
| F | 14.9325650 | 16.4718610 | 16.1286640 |
| F | 13.4155460 | 15.4948830 | 17.3693340 |
| H | 15.5875570 | 12.5269340 | 20.0565200 |
| H | 12.2899670 | 10.0538890 | 21.3125480 |
| H | 15.7480060 | 15.4078920 | 24.8111460 |
| H | 12.6177680 | 18.3689460 | 24.8691990 |
| H | 20.0017980 | 12.8014100 | 25.0762340 |
| H | 16.3233680 | 11.8989520 | 23.0261360 |
| H | 14.1175820 | 15.0893190 | 19.7400350 |
| H | 17.2044970 | 16.4980890 | 17.0931610 |
| H | 17.7494490 | 15.9589940 | 23.1950640 |

|   |            |            |            |
|---|------------|------------|------------|
| H | 18.2245280 | 15.0754020 | 21.0280490 |
| H | 13.4515980 | 16.1881010 | 21.2593480 |
| H | 13.3246780 | 13.5845770 | 23.5607460 |
| H | 19.5868100 | 21.4733350 | 22.7663090 |
| H | 17.4086880 | 22.6449310 | 20.8316400 |
| H | 19.3702650 | 19.0937580 | 22.6159300 |
| H | 17.3784620 | 21.1907090 | 23.0134600 |
| H | 18.9287550 | 18.7185140 | 19.8375020 |
| H | 18.2802530 | 19.0770410 | 17.4656070 |
| H | 17.1438030 | 21.1885400 | 16.7853390 |
| H | 16.7264900 | 22.9760870 | 18.4745450 |
| H | 12.8782960 | 22.7220480 | 23.6439360 |
| H | 13.4078870 | 21.1789300 | 24.3546440 |
| H | 12.6640380 | 21.2083790 | 22.7333550 |
| H | 15.6212910 | 21.1221100 | 24.9725570 |
| H | 15.6416910 | 19.3484920 | 24.9200000 |
| H | 17.4858620 | 22.4161380 | 25.6974390 |
| H | 19.6969860 | 22.5141770 | 26.8234120 |
| H | 21.0137160 | 20.4209550 | 27.1697490 |
| H | 20.0993110 | 18.2405680 | 26.3849060 |
| H | 17.8915330 | 18.1472300 | 25.2471370 |
| H | 15.3754720 | 22.5269640 | 23.4306900 |
| H | 14.5972830 | 22.5231440 | 21.8353870 |

## Catalyst\_Int\_2

109

|    |            |            |            |
|----|------------|------------|------------|
| C  | 16.3759180 | 23.8803470 | 21.9129520 |
| C  | 15.7453890 | 22.7000310 | 21.4863520 |
| C  | 14.5969790 | 22.2688350 | 22.1658550 |
| C  | 14.0917700 | 22.9900860 | 23.2508580 |
| C  | 14.7325240 | 24.1593550 | 23.6730020 |
| C  | 15.8749900 | 24.6042840 | 22.9988990 |
| C  | 16.3374870 | 21.8729190 | 20.3731160 |
| C  | 17.5797740 | 21.1007370 | 20.8298480 |
| O  | 17.9139390 | 20.1844110 | 19.8066860 |
| C  | 19.2965090 | 19.7257670 | 19.8468540 |
| C  | 20.2577900 | 20.7230020 | 19.2248570 |
| O  | 17.3146190 | 20.3455610 | 22.0217390 |
| Si | 17.8376310 | 20.7830560 | 23.5949920 |
| C  | 18.1134750 | 19.1443910 | 24.4717120 |
| C  | 17.2365540 | 18.7180390 | 25.4865320 |
| C  | 17.4103310 | 17.4789930 | 26.1110570 |
| C  | 18.4733020 | 16.6524520 | 25.7356700 |
| C  | 19.3593120 | 17.0629930 | 24.7330400 |
| C  | 19.1781860 | 18.2964530 | 24.1031440 |

|   |            |            |            |
|---|------------|------------|------------|
| F | 18.8220370 | 16.5330890 | 21.1460960 |
| C | 19.0359710 | 15.1725300 | 21.3632680 |
| F | 20.1753220 | 15.0781430 | 22.0827120 |
| C | 17.8430340 | 14.5456440 | 22.0271960 |
| C | 16.6133220 | 14.6209850 | 21.3552520 |
| C | 15.4239300 | 14.0975390 | 21.8842620 |
| C | 15.5491880 | 13.4644620 | 23.1396470 |
| C | 16.7707300 | 13.3761260 | 23.8114930 |
| C | 17.9401310 | 13.9209470 | 23.2660280 |
| B | 13.9579200 | 14.2761330 | 21.1350400 |
| C | 13.0574690 | 15.3818930 | 21.9455860 |
| C | 11.6820350 | 15.5074000 | 21.6647110 |
| C | 10.9145040 | 16.5598350 | 22.1716050 |
| C | 11.4920370 | 17.5497090 | 22.9720940 |
| C | 12.8465770 | 17.4314360 | 23.2800270 |
| C | 13.6044540 | 16.3526110 | 22.7975410 |
| C | 16.8658050 | 12.6370910 | 25.1229920 |
| F | 17.3964690 | 11.3863820 | 24.9574570 |
| C | 9.4558320  | 16.6330650 | 21.7966490 |
| F | 9.2911690  | 16.8008950 | 20.4482690 |
| C | 13.5433420 | 18.4813400 | 24.0976470 |
| F | 14.0475510 | 17.9926380 | 25.2624090 |
| C | 13.1570740 | 12.8435920 | 21.1143630 |
| C | 13.0270460 | 12.0196770 | 19.9830020 |
| C | 12.3769240 | 10.7811790 | 20.0363040 |
| C | 11.8311860 | 10.3048170 | 21.2304390 |
| C | 11.9245020 | 11.1183780 | 22.3595710 |
| C | 12.5559260 | 12.3656080 | 22.2942860 |
| C | 11.3230140 | 10.6862720 | 23.6696240 |
| F | 10.9167870 | 9.3877950  | 23.6659410 |
| C | 12.3232610 | 9.9180830  | 18.8047990 |
| F | 12.3145850 | 10.6507470 | 17.6553900 |
| C | 14.2460710 | 14.8904560 | 19.6363390 |
| C | 13.8610920 | 16.1884810 | 19.2598960 |
| C | 14.2823060 | 16.7791730 | 18.0588080 |
| C | 15.0645470 | 16.0727610 | 17.1456870 |
| C | 15.4212220 | 14.7625340 | 17.4762810 |
| C | 15.0415680 | 14.1976710 | 18.6982430 |
| C | 13.9334740 | 18.2230670 | 17.8302930 |
| F | 12.6006720 | 18.4670770 | 17.9139760 |
| C | 16.2957520 | 13.9486700 | 16.5570090 |
| F | 17.5476480 | 13.7744720 | 17.0845860 |
| F | 14.5197600 | 19.0143430 | 18.8226070 |
| F | 14.3707420 | 18.7087780 | 16.6493410 |
| F | 15.7870540 | 12.6986580 | 16.3526310 |
| F | 16.4582040 | 14.5204140 | 15.3348830 |



|   |            |            |            |
|---|------------|------------|------------|
| F | 10.2300990 | 11.4410140 | 24.0044700 |
| F | 12.2094420 | 10.8228210 | 24.7034980 |
| F | 13.4097540 | 9.0832890  | 18.7221270 |
| F | 11.2206990 | 9.1162270  | 18.7753530 |
| F | 19.2795410 | 14.6464560 | 20.1321440 |
| F | 17.6747590 | 13.2801470 | 26.0185400 |
| F | 15.6575560 | 12.4751020 | 25.7231580 |
| F | 8.7892130  | 15.4871970 | 22.1248380 |
| F | 8.8045270  | 17.6600490 | 22.4053920 |
| F | 14.6314510 | 18.9917220 | 23.3965110 |
| F | 12.7619150 | 19.5415670 | 24.4061350 |
| K | 16.2622420 | 18.0315780 | 21.0791180 |
| H | 19.1001080 | 21.5733250 | 23.4058790 |
| H | 16.7923930 | 21.5808690 | 24.3093890 |
| H | 16.4042420 | 19.3566970 | 25.7910610 |
| H | 16.7161500 | 17.1600490 | 26.8911840 |
| H | 18.6115610 | 15.6863240 | 26.2238420 |
| H | 20.1926410 | 16.4205950 | 24.4426750 |
| H | 19.8810820 | 18.6017070 | 23.3227730 |
| H | 19.5751330 | 19.4923310 | 20.8891490 |
| H | 19.2974340 | 18.7840030 | 19.2808320 |
| H | 21.2750520 | 20.3040080 | 19.2321220 |
| H | 19.9762600 | 20.9340340 | 18.1837300 |
| H | 20.2834430 | 21.6706250 | 19.7818230 |
| H | 16.6371460 | 22.5032820 | 19.5224050 |
| H | 15.5991510 | 21.1489290 | 19.9939860 |
| H | 14.0953660 | 21.3521950 | 21.8455630 |
| H | 13.1993030 | 22.6345730 | 23.7701190 |
| H | 14.3413800 | 24.7236540 | 24.5218890 |
| H | 16.3773680 | 25.5195880 | 23.3187250 |
| H | 17.2674970 | 24.2374210 | 21.3902460 |
| H | 13.4188280 | 12.3507970 | 19.0210370 |
| H | 11.3347910 | 9.3362270  | 21.2753240 |
| H | 14.6539410 | 16.2687330 | 23.0993100 |
| H | 10.9026970 | 18.3867250 | 23.3435010 |
| H | 18.8917020 | 13.8544690 | 23.7918630 |
| H | 14.6702600 | 13.0234200 | 23.6100910 |
| H | 13.2265180 | 16.7755270 | 19.9283560 |
| H | 15.3913230 | 16.5271560 | 16.2115270 |
| H | 16.6045890 | 15.0741680 | 20.3608610 |
| H | 15.4139060 | 13.2004840 | 18.9438910 |
| H | 11.2051600 | 14.7704170 | 21.0132780 |
| H | 12.5618550 | 12.9887720 | 23.1916500 |
| H | 18.4184050 | 21.7937150 | 21.0279930 |

Catalyst\_ts\_2

124

|   |            |            |            |
|---|------------|------------|------------|
| C | 0.8674800  | -3.7194710 | -2.2416680 |
| C | 0.5206650  | -3.2639330 | -0.9560900 |
| C | 0.3131150  | -4.2615510 | 0.0138830  |
| C | 0.4840830  | -5.6235220 | -0.2627600 |
| C | 0.8437390  | -6.0512230 | -1.5386500 |
| C | 1.0228250  | -5.0794400 | -2.5279960 |
| B | 0.3606630  | -1.6736550 | -0.5400720 |
| C | 1.7340320  | -1.1682900 | 0.2310820  |
| C | 2.3328870  | -1.9242720 | 1.2636240  |
| C | 3.4341980  | -1.4612840 | 1.9873540  |
| C | 4.0146330  | -0.2187350 | 1.7043940  |
| C | 3.4586630  | 0.5353330  | 0.6747480  |
| C | 2.3372750  | 0.0729350  | -0.0341860 |
| C | 3.9774700  | -2.2605000 | 3.1462170  |
| F | 5.3380120  | -2.2106700 | 3.2127050  |
| C | 4.0113300  | 1.8855020  | 0.3123930  |
| F | 3.0509310  | 2.8720160  | 0.5155200  |
| C | 0.2366660  | -6.6129770 | 0.8435380  |
| F | 0.5576150  | -7.8895060 | 0.5005070  |
| C | 1.4307980  | -5.5311520 | -3.9047820 |
| F | 1.2630810  | -4.5678020 | -4.8504990 |
| C | -0.9145080 | -1.6012650 | 0.4939240  |
| C | -2.1972580 | -1.9840430 | 0.0446110  |
| C | -3.3224820 | -1.9276940 | 0.8695660  |
| C | -3.2228470 | -1.4998060 | 2.1987010  |
| C | -1.9598770 | -1.1606890 | 2.6762620  |
| C | -0.8337120 | -1.2226650 | 1.8398810  |
| C | -1.7593960 | -0.6829510 | 4.0867420  |
| F | -2.8865680 | -0.6800490 | 4.8284780  |
| C | -4.6497290 | -2.3763350 | 0.3111230  |
| F | -4.8612770 | -1.8873640 | -0.9462530 |
| F | -1.2752970 | 0.6201480  | 4.0955680  |
| F | -0.8248390 | -1.4173900 | 4.7542570  |
| C | 0.1076230  | -0.7159510 | -1.8506430 |
| C | -1.0623360 | 0.0286110  | -2.0820340 |
| C | -1.2298300 | 0.8234120  | -3.2244930 |
| C | -0.2161410 | 0.9371060  | -4.1755580 |
| C | 0.9684780  | 0.2331720  | -3.9536180 |
| C | 1.1225810  | -0.5708920 | -2.8199290 |
| C | -2.5170920 | 1.5890530  | -3.3874630 |
| F | -3.6080150 | 0.8234110  | -3.1193020 |
| C | 2.1230320  | 0.3469510  | -4.9127680 |
| F | 3.2113970  | 0.9352820  | -4.3240030 |
| F | -4.7216070 | -3.7386590 | 0.2132180  |

|    |            |            |            |
|----|------------|------------|------------|
| F  | -5.7038920 | -1.9798440 | 1.0749340  |
| F  | -2.5791440 | 2.6620530  | -2.5304840 |
| F  | -2.6760160 | 2.0933540  | -4.6438420 |
| F  | 2.5450640  | -0.8776580 | -5.3519260 |
| F  | 1.8252820  | 1.0832050  | -6.0167050 |
| F  | 5.0902900  | 2.2446190  | 1.0408710  |
| F  | 4.3491970  | 1.9745490  | -1.0023450 |
| F  | 3.5126380  | -1.7702540 | 4.3405730  |
| F  | 3.6223650  | -3.5695260 | 3.0955280  |
| F  | -1.0764760 | -6.6253090 | 1.2315900  |
| F  | 0.9606950  | -6.3083620 | 1.9649880  |
| F  | 2.7527590  | -5.8959120 | -3.9484190 |
| F  | 0.7217690  | -6.6241870 | -4.3187680 |
| K  | 0.4851690  | 1.7689790  | 1.9864730  |
| O  | -0.5614860 | 4.2650590  | 1.7767450  |
| Si | -0.0526570 | 5.1345760  | 3.0966660  |
| C  | 1.1818290  | 4.0350990  | 4.0443240  |
| C  | 0.7245450  | 3.1077900  | 5.0046140  |
| C  | 1.5727020  | 2.1204120  | 5.5210790  |
| C  | 2.9013490  | 2.0423170  | 5.0860880  |
| C  | 3.3845540  | 2.9709510  | 4.1560780  |
| C  | 2.5319920  | 3.9560360  | 3.6429260  |
| Si | -2.3745800 | 3.8404290  | 1.1161160  |
| C  | -4.0872660 | 3.3229470  | 0.3023840  |
| C  | -4.4666020 | 1.9721360  | 0.2174450  |
| C  | -5.6895370 | 1.5821570  | -0.3412240 |
| C  | -6.5680820 | 2.5502260  | -0.8400430 |
| C  | -6.2133100 | 3.9029130  | -0.7725520 |
| C  | -4.9861090 | 4.2754760  | -0.2099050 |
| C  | 0.0917660  | 5.3258370  | -0.9721490 |
| O  | 0.9887320  | 5.9982870  | -0.3726850 |
| C  | 0.7709090  | 7.4713220  | -0.1912020 |
| C  | 1.4130530  | 8.2007060  | -1.3442830 |
| C  | 0.3759780  | 3.9560440  | -1.4232050 |
| C  | 0.7928820  | 4.1989350  | -2.8783720 |
| C  | -0.1735020 | 4.4934520  | -3.8539680 |
| C  | 0.2163710  | 4.7008330  | -5.1789000 |
| C  | 1.5681140  | 4.6302400  | -5.5298730 |
| C  | 2.5336260  | 4.3593840  | -4.5530070 |
| C  | 2.1519360  | 4.1620320  | -3.2255000 |
| H  | 0.6736500  | 6.3964850  | 2.6948780  |
| H  | -1.1839390 | 5.4965980  | 4.0264710  |
| H  | -0.3146270 | 3.1434370  | 5.3443870  |
| H  | 1.1943780  | 1.4058910  | 6.2551200  |
| H  | 3.5595070  | 1.2627620  | 5.4751570  |
| H  | 4.4237780  | 2.9222920  | 3.8237330  |

|   |            |            |            |
|---|------------|------------|------------|
| H | 2.9225510  | 4.6624870  | 2.9048380  |
| H | -0.3128860 | 7.6316720  | -0.1168440 |
| H | 1.2493450  | 7.6763890  | 0.7714620  |
| H | 1.3013690  | 9.2804250  | -1.1693350 |
| H | 2.4847420  | 7.9720260  | -1.4133360 |
| H | 0.9239600  | 7.9555850  | -2.2977330 |
| H | 1.1983990  | 3.5196070  | -0.8473520 |
| H | -0.5271060 | 3.3364290  | -1.3643350 |
| H | -1.2306130 | 4.5316690  | -3.5859300 |
| H | -0.5386440 | 4.9124900  | -5.9378810 |
| H | 1.8713330  | 4.7843690  | -6.5667630 |
| H | 3.5876240  | 4.2939000  | -4.8271150 |
| H | 2.9056810  | 3.9473120  | -2.4650420 |
| H | 1.0033990  | -3.0048780 | -3.0533250 |
| H | 0.9677000  | -7.1108170 | -1.7613160 |
| H | 0.1477740  | -1.0189110 | 2.2790890  |
| H | -4.1019730 | -1.4432320 | 2.8389720  |
| H | 4.8805270  | 0.1391850  | 2.2609900  |
| H | 1.9312730  | -2.9085170 | 1.5101850  |
| H | -1.8813460 | -0.0068870 | -1.3610230 |
| H | -0.3418190 | 1.5571950  | -5.0612780 |
| H | 1.9389340  | 0.6988220  | -0.8372500 |
| H | 2.0761820  | -1.0866380 | -2.6782570 |
| H | -2.3151810 | -2.3414040 | -0.9811530 |
| H | -0.0109660 | -3.9772240 | 1.0179300  |
| H | -0.8350730 | 5.8302380  | -1.2745210 |
| H | -1.7716560 | 2.4682030  | 0.8073120  |
| H | -2.1811960 | 5.0281690  | 0.1718910  |
| H | -2.9040870 | 4.1113560  | 2.5087390  |
| H | -4.7203640 | 5.3387160  | -0.1797170 |
| H | -3.7817620 | 1.1975740  | 0.5832720  |
| H | -6.8909860 | 4.6651730  | -1.1666790 |
| H | -5.9535120 | 0.5239270  | -0.4038160 |
| H | -7.5201580 | 2.2517710  | -1.2850250 |

Pdt\_1

29

|    |            |            |            |
|----|------------|------------|------------|
| C  | -0.4052270 | -0.2171270 | 0.1628120  |
| C  | -0.5750450 | -0.5457450 | 1.5207630  |
| C  | 0.5297410  | -0.4134240 | 2.3858130  |
| C  | 1.7640930  | 0.0358990  | 1.9082890  |
| C  | 1.9170140  | 0.3537490  | 0.5530650  |
| C  | 0.8316160  | 0.2261510  | -0.3197940 |
| Si | -2.2372760 | -1.1606340 | 2.1630350  |
| H  | -3.2382670 | -1.1021190 | 1.0418050  |

|    |            |            |            |
|----|------------|------------|------------|
| H  | -2.1233640 | -2.5612930 | 2.6888520  |
| H  | 0.4278870  | -0.6581120 | 3.4467290  |
| H  | 2.6098440  | 0.1359520  | 2.5919620  |
| H  | 2.8821250  | 0.7020830  | 0.1789350  |
| H  | 0.9468620  | 0.4759300  | -1.3767770 |
| H  | -1.2474750 | -0.3042820 | -0.5291010 |
| O  | -2.7496140 | -0.2109990 | 3.4550160  |
| Si | -3.9307580 | 0.9560020  | 3.7398920  |
| C  | -5.3668850 | 0.2196140  | 4.7124600  |
| H  | -4.4487020 | 1.4779150  | 2.4279940  |
| H  | -3.2700650 | 2.0426360  | 4.5342180  |
| C  | -6.5812680 | -0.1011060 | 4.0760850  |
| C  | -7.6393620 | -0.6697730 | 4.7931820  |
| C  | -7.4970950 | -0.9282720 | 6.1605710  |
| C  | -6.2973850 | -0.6146020 | 6.8100240  |
| C  | -5.2435550 | -0.0426780 | 6.0914430  |
| H  | -6.7069030 | 0.0964900  | 3.0077810  |
| H  | -8.5754920 | -0.9106080 | 4.2848040  |
| H  | -8.3221560 | -1.3719190 | 6.7219060  |
| H  | -6.1852470 | -0.8123870 | 7.8782220  |
| H  | -4.3142350 | 0.2012750  | 6.6139910  |

Pdt\_2

25

|   |            |            |            |
|---|------------|------------|------------|
| C | -0.1055580 | -0.2850570 | -1.9216580 |
| C | -0.3792320 | 0.2750270  | -0.6617410 |
| C | 0.7091600  | 0.7011780  | 0.1186690  |
| C | 2.0228160  | 0.6124810  | -0.3651820 |
| C | 2.2726960  | 0.1001060  | -1.6430590 |
| C | 1.1996050  | -0.3644230 | -2.4156730 |
| C | -1.8232020 | 0.4269670  | -0.2301070 |
| C | -2.0792870 | 0.5094800  | 1.2735050  |
| O | -3.4946370 | 0.6101380  | 1.4834840  |
| C | -3.8750780 | 1.4142470  | 2.6124290  |
| C | -5.2998090 | 1.0620120  | 3.0092180  |
| H | -2.4160490 | -0.4006250 | -0.6531430 |
| H | 0.5455010  | 1.1106370  | 1.1170580  |
| H | 2.8572910  | 0.9208400  | 0.2717310  |
| H | 3.2946900  | 0.0402140  | -2.0257440 |
| H | 1.3815500  | -0.8252050 | -3.3906430 |
| H | -0.9374750 | -0.6625450 | -2.5224920 |
| H | -3.1830760 | 1.2338850  | 3.4548570  |
| H | -3.7999600 | 2.4863440  | 2.3446910  |
| H | -5.6315490 | 1.7047530  | 3.8406820  |
| H | -5.9947090 | 1.2109610  | 2.1674030  |

|   |            |            |            |
|---|------------|------------|------------|
| H | -5.3540360 | 0.0117950  | 3.3347130  |
| H | -1.5633790 | 1.3796810  | 1.7137330  |
| H | -2.2191870 | 1.3471790  | -0.6932990 |
| H | -1.7010680 | -0.3954070 | 1.7852610  |

Without Catalyst Int\_1

39

|    |            |            |            |
|----|------------|------------|------------|
| O  | 0.2894540  | 0.5731040  | -0.5706740 |
| Si | -0.0501800 | -0.3218910 | 0.8371430  |
| H  | 0.2369090  | -1.7813770 | 0.6624630  |
| H  | 0.9078860  | 0.2608790  | 1.8342160  |
| C  | -1.7966780 | -0.0179530 | 1.5029380  |
| C  | -1.9693170 | 0.2021280  | 2.8832850  |
| C  | -3.2420340 | 0.4058840  | 3.4283510  |
| C  | -4.3669600 | 0.4039630  | 2.5967720  |
| C  | -4.2131730 | 0.1968440  | 1.2209970  |
| C  | -2.9404480 | -0.0146880 | 0.6820150  |
| H  | -1.0993220 | 0.2224200  | 3.5460230  |
| H  | -3.3549390 | 0.5741790  | 4.5017060  |
| H  | -5.3607730 | 0.5682130  | 3.0188940  |
| H  | -5.0878230 | 0.1994360  | 0.5665690  |
| H  | -2.8300660 | -0.1776880 | -0.3914680 |
| C  | -0.0589730 | 0.1592660  | -1.8708680 |
| C  | 1.2078300  | -0.1391420 | -2.6997980 |
| O  | -0.9040480 | -0.9814950 | -1.7451020 |
| H  | -0.6233220 | 0.9813390  | -2.3562880 |
| C  | -1.7642810 | -1.2250830 | -2.8716600 |
| C  | -2.5753890 | -2.4723760 | -2.5825490 |
| H  | -2.4193550 | -0.3471370 | -3.0320840 |
| H  | -1.1609150 | -1.3632000 | -3.7869950 |
| H  | -3.2490000 | -2.6846620 | -3.4249030 |
| H  | -1.9137360 | -3.3381350 | -2.4378460 |
| H  | -3.1833710 | -2.3454070 | -1.6755470 |
| H  | 0.8875790  | -0.3964940 | -3.7216680 |
| H  | 1.7755490  | 0.8008900  | -2.7668060 |
| C  | 2.0538170  | -1.2378390 | -2.1130810 |
| C  | 3.0711090  | -0.9452180 | -1.1900090 |
| C  | 3.8178890  | -1.9682390 | -0.5968670 |
| C  | 3.5610980  | -3.3041440 | -0.9232630 |
| C  | 2.5542180  | -3.6080750 | -1.8465700 |
| C  | 1.8082350  | -2.5826730 | -2.4339040 |
| H  | 3.2738060  | 0.0968250  | -0.9314930 |
| H  | 4.6043320  | -1.7207810 | 0.1196600  |
| H  | 4.1453480  | -4.1044810 | -0.4642920 |
| H  | 2.3502850  | -4.6481810 | -2.1105000 |

H 1.0210150 -2.8275190 -3.1509360

Without Catalyst ts\_1

39

|    |            |            |            |
|----|------------|------------|------------|
| C  | 18.4712360 | 20.7184000 | 18.1040660 |
| C  | 18.5859740 | 20.1767090 | 19.3899230 |
| C  | 18.3870820 | 20.9744220 | 20.5316490 |
| C  | 18.0534900 | 22.3293980 | 20.3467070 |
| C  | 17.9381390 | 22.8761810 | 19.0655460 |
| C  | 18.1482080 | 22.0696240 | 17.9401960 |
| Si | 18.6092260 | 20.2491550 | 22.2688990 |
| O  | 16.8850020 | 19.2764290 | 22.6104040 |
| C  | 16.2918230 | 20.2808260 | 23.1695740 |
| O  | 15.3384080 | 20.8389020 | 22.4224990 |
| C  | 14.5727570 | 22.0089830 | 22.8736170 |
| C  | 13.2827670 | 21.6062550 | 23.5590410 |
| C  | 16.2319940 | 20.3982770 | 24.6892590 |
| C  | 17.5386750 | 20.1081990 | 25.3810140 |
| C  | 18.2926490 | 21.1624180 | 25.9194670 |
| C  | 19.5226150 | 20.9165710 | 26.5339650 |
| C  | 20.0119270 | 19.6088020 | 26.6222850 |
| C  | 19.2635460 | 18.5506190 | 26.0963440 |
| C  | 18.0327660 | 18.7980920 | 25.4810140 |
| H  | 19.8222020 | 20.8954610 | 22.9481550 |
| H  | 17.8798260 | 22.9663230 | 21.2189510 |
| H  | 19.1599090 | 18.8431430 | 22.0838390 |
| H  | 17.6420420 | 21.3449530 | 23.0036650 |
| H  | 18.8355830 | 19.1182640 | 19.5047400 |
| H  | 18.6312290 | 20.0846960 | 17.2287800 |
| H  | 18.0565830 | 22.4938450 | 16.9378480 |
| H  | 17.6829760 | 23.9314190 | 18.9427140 |
| H  | 12.6917500 | 22.5111250 | 23.7631040 |
| H  | 13.4611300 | 21.0944060 | 24.5142730 |
| H  | 12.6889630 | 20.9476390 | 22.9105710 |
| H  | 15.8544360 | 21.3826340 | 24.9903560 |
| H  | 15.4682250 | 19.6527990 | 24.9787560 |
| H  | 17.9160860 | 22.1855720 | 25.8450180 |
| H  | 20.1012630 | 21.7472890 | 26.9428120 |
| H  | 20.9740580 | 19.4149750 | 27.1007200 |
| H  | 19.6376980 | 17.5272820 | 26.1663760 |
| H  | 17.4537800 | 17.9710950 | 25.0658230 |
| H  | 15.2156020 | 22.6388690 | 23.5039910 |
| H  | 14.3730720 | 22.5502780 | 21.9406910 |

Without Catalyst ts\_2

54

|    |            |            |            |
|----|------------|------------|------------|
| C  | -1.4546900 | 2.9370130  | -1.6651760 |
| C  | -1.3707200 | 3.3870330  | -0.3382530 |
| C  | -1.1025750 | 4.7409340  | -0.0790420 |
| C  | -0.9437740 | 5.6401150  | -1.1359130 |
| C  | -1.0330130 | 5.1882700  | -2.4571290 |
| C  | -1.2964330 | 3.8384990  | -2.7198420 |
| C  | -1.4303870 | 2.3917310  | 0.8211690  |
| C  | 0.0044230  | 2.2365670  | 1.1161330  |
| O  | 0.5079110  | 2.8098520  | 2.1444370  |
| C  | 1.9997120  | 2.7878020  | 2.2928720  |
| C  | 2.3471880  | 3.5675820  | 3.5335270  |
| O  | 0.5817680  | -0.3445500 | 0.6803970  |
| Si | 1.7930970  | -0.5445720 | -0.4311070 |
| C  | 1.3092890  | -1.5987850 | -1.9315630 |
| C  | 0.6432050  | -1.0322090 | -3.0356630 |
| C  | 0.2334510  | -1.8214050 | -4.1162100 |
| C  | 0.4817780  | -3.1987340 | -4.1089300 |
| C  | 1.1461170  | -3.7802340 | -3.0227660 |
| C  | 1.5582680  | -2.9847190 | -1.9493080 |
| Si | 0.2240860  | -0.9402710 | 2.5002270  |
| C  | -0.6521020 | -2.5680200 | 1.9446930  |
| C  | -0.9528370 | -2.8795870 | 0.6047520  |
| C  | -1.5728790 | -4.0844200 | 0.2530330  |
| C  | -1.9157690 | -5.0137800 | 1.2408270  |
| C  | -1.6407220 | -4.7223240 | 2.5817380  |
| C  | -1.0206260 | -3.5146480 | 2.9223110  |
| H  | -0.5818550 | 0.3528720  | 2.5793620  |
| H  | -0.0509540 | -1.2338060 | 4.0287840  |
| H  | -1.8416880 | 1.4298360  | 0.4891590  |
| H  | -1.9878700 | 2.7683280  | 1.6875890  |
| H  | 2.4092670  | 3.2325850  | 1.3766000  |
| H  | 2.2807280  | 1.7263970  | 2.3551070  |
| H  | 1.9497450  | 3.0848890  | 4.4362770  |
| H  | 1.9692220  | 4.5973670  | 3.4776790  |
| H  | 3.4423760  | 3.6116820  | 3.6205850  |
| H  | 3.0460540  | -1.1401150 | 0.1669730  |
| H  | 0.4426600  | 0.0431230  | -3.0593640 |
| H  | 2.1304730  | 0.8370650  | -0.9690900 |
| H  | 2.0720830  | -3.4547240 | -1.1058440 |
| H  | 1.3423840  | -4.8550480 | -3.0118020 |
| H  | 0.1597280  | -3.8179980 | -4.9491160 |
| H  | -0.2756620 | -1.3633040 | -4.9666370 |
| H  | -1.6546920 | 1.8822550  | -1.8683900 |
| H  | -1.3705330 | 3.4856980  | -3.7500290 |



|   |            |            |            |
|---|------------|------------|------------|
| H | -0.8922630 | 5.8877970  | -3.2832820 |
| H | -0.7356700 | 6.6908710  | -0.9267870 |
| H | -1.0170770 | 5.0895470  | 0.9531920  |
| H | -0.6887630 | -2.1677980 | -0.1764990 |
| H | -1.7815620 | -4.2993760 | -0.7982880 |
| H | -2.3956520 | -5.9568980 | 0.9689280  |
| H | -1.9108020 | -5.4365470 | 3.3639850  |
| H | -0.8189820 | -3.2944040 | 3.9744510  |
| H | 1.7342050  | -0.9253370 | 2.7150880  |
| H | 0.6673790  | 1.7943310  | 0.3688150  |
